1

2 **Novel roles for *BicD* in pronuclear fusion and meiosis II progression**  
3 **via localization of the CHC/TACC/Msps complex to MII spindles**

4

5 **Paula Vazquez-Pianzola<sup>1\*</sup>, Dirk Beuchle<sup>1</sup>, Gabriela Saro<sup>1</sup>, Greco Hernández<sup>2</sup>, Giovanna**  
6 **Maldonado<sup>2</sup>, Dominique Brunßen<sup>1</sup>, Peter Meister<sup>1</sup> and Beat Suter<sup>1\*</sup>.**

7

8 <sup>1</sup> Institute of Cell Biology, University of Bern, 3012 Berne, Switzerland.

9 <sup>2</sup> Laboratory of Translation and Cancer, Unit of Biomedical Research on Cancer, Instituto  
10 Nacional de Cancerología (INCan), Mexico City, Mexico.

11

12

13

14 \* Authors for correspondence: ([beat.suter@izb.unibe.ch](mailto:beat.suter@izb.unibe.ch), [paula.vazquez@izb.unibe.ch](mailto:paula.vazquez@izb.unibe.ch))

15

16 keywords: *Drosophila* meiosis, mitosis, spindle assembly, clathrin, Bicaudal-D, BicD,  
17 TACC, CH-TOG, microtubule transport, deGradFP.

18 short title: Novel role for *BicD* in meiotic spindle assembly

19

20

## 21 ABSTRACT

22 Vertebrate Clathrin heavy chain (Chc) plays a moonlighting function during mitosis. Chc  
23 forms a complex with TACC3 (Transforming Acidic Coiled Coil 3) and ch-TOG (colonic  
24 hepatic tumor overexpressed gene) at the spindle microtubules, forming inter microtubule  
25 bridges that stabilize the K-fibers. Since *Drosophila* Chc is a cargo of the dynein adaptor  
26 Bicaudal-D (BicD), we investigated whether BicD regulates Clathrin function at the spindle.  
27 We found that BicD localizes, like Chc, to centrosomes and spindles during mitosis and  
28 meiosis II, and that Chc interacts with *Drosophila* TACC (D-TACC). Using deGradFP to  
29 reduce the activity of BicD in mature eggs and very young embryos, we uncovered a novel  
30 function of BicD in meiosis II. The affected meiosis II products underwent abnormal rounds  
31 of additional replications and failed to carry out pronuclear fusion. Pointing to a mechanism,  
32 we found that the localization of Clathrin/D-TACC/Minispindles (Msps, homolog of ch-  
33 TOG) to the meiosis II spindles was impaired upon BicD knockdown. Furthermore, the  
34 meiotic products showed abnormal staining for PH3 and reduced recruitment of spindle  
35 assembly checkpoint (SAC) components. Altogether, our results support the notion that BicD  
36 performs a key activity in assembling the meiotic spindle apparatus. This function of BicD  
37 seems conserved in evolution because *C. elegans* embryos with reduced activities of these  
38 genes developed comparable phenotypes.

39

## 40 INTRODUCTION

41 Meiosis and mitosis are cell division mechanisms essential for the life and reproduction of  
42 eukaryotes. The spindle apparatus is the primary structure involved in the segregation of  
43 chromosomes during these processes. Consequently, aberrant spindle assembly during  
44 meiosis frequently leads to chromosome segregation problems and aneuploidy, which is the  
45 primary cause of infertility, pregnancy loss and mental congenital defects in humans.  
46 Additionally, mitotic errors leading to aneuploidy during early embryogenesis are mainly  
47 lethal. When such errors occur later in life, they lead to premature aging and tumorigenesis  
48 (Levine and Holland, 2018). The spindle apparatus comprises three classes of microtubules  
49 (MTs): astral MTs extending from the centrioles towards the cell cortex, interpolar MTs  
50 connecting the spindle poles (centrosomes), and kinetochore MTs. Kinetochore MTs bundle  
51 together into K-fibers (kinetochore fibers) connecting the spindle poles with the kinetochores  
52 in the centromere region of the chromosomes. They are most directly responsible for  
53 chromosome segregation.

54 Structurally, K-fibers are cross-linked MTs with electron-dense inter-MT bridges  
55 composed of motor proteins or non-motor microtubule-associated proteins (MAPs). Among  
56 these, clathrin was shown to be part of the mitotic spindles in mammalian and *Xenopus* cells

57 (Fu et al., 2010; Royle et al., 2005). This observation was surprising, as clathrin was best  
58 known for its central role in receptor-mediated endocytosis. Clathrin is composed of three  
59 Clathrin heavy chains (Chc) and three Clathrin light chains (Clc) shaped as a trimer scaffold  
60 protein (called triskelion) (Brody, 2012). On K-MTs, Clathrin was shown to play a non-  
61 canonical or moonlighting activity by stabilizing the spindle microtubules during mitosis  
62 (Royle, 2012). This function depends on clathrin trimerization and its interaction with Aurora  
63 A-phosphorylated Transforming Acidic Coiled-Coil protein 3 (TACC3) and the protein  
64 product of the colonic hepatic Tumor Overexpressed Gene (ch-TOG) (Booth et al., 2011; Fu  
65 et al., 2010; Lin et al., 2010; Royle and Lagnado, 2006; Royle et al., 2005). This  
66 heterotrimeric complex is recruited to the spindle microtubules and required to form inter  
67 microtubule bridges between K-fibers. The complex thereby stabilizes these fibers and  
68 promotes chromosome congression (Booth et al., 2011; Royle et al., 2005). This function  
69 explains why the lack of Chc results in cells with persistent activation of the spindle  
70 checkpoint (Royle et al., 2005).

71 The TACC3/Chc/ch-TOG complex also plays a role during meiosis. Clathrin was  
72 first reported to localize to the second metaphase spindle in unfertilized mouse eggs (Maro et  
73 al., 1985). ch-TOG and Chc localize to the meiosis I (MI) spindle in mouse oocytes (Lu et al.,  
74 2017). More recently, Aurora A-phosphorylated TACC3 together with one of the mammalian  
75 homologs of Chc (CHC17) were shown to control the formation of a new liquid-like spindle  
76 domain (LISD). These promote the assembly of acentrosomal mammalian oocyte spindles,  
77 and their disruption leads to severe spindle defects (So et al., 2019). In *Drosophila*, homologs  
78 of TACC (D-TACC) and ch-TOG (Mini spindles, Msps), are also enriched at the anastral  
79 poles of the MI spindles in stage 14 oocytes (Cullen and Ohkura, 2001).

80 We and others have found that Chc binds *Drosophila* Bicaudal-D (BicD) (Li et al.,  
81 2010; Vazquez-Pianzola et al., 2014). This interaction facilitates Chc transport, which is  
82 required for vesicle recycling at the neuromuscular junction, and for the assembly of the pole  
83 plasm during oogenesis. Encoded by a single gene, the *Drosophila* BicD protein is part of a  
84 family of evolutionarily conserved dynein adaptor proteins responsible for the transport of  
85 different cargoes along microtubules (Vazquez-Pianzola and Suter, 2012; Vazquez-Pianzola  
86 et al. 2016). The founding member of this protein family, *Drosophila* BicD, was identified as  
87 a protein essential during oogenesis and embryo development through its role in the  
88 intracellular transport of mRNAs which control polarity and cell fate (Bullock and Ish-  
89 Horowicz, 2001; Suter and Steward, 1991; Suter et al., 1989; Wharton and Struhl, 1989). This  
90 process is mediated by its binding to the RNA-binding protein Egalitarian (Egl) (Dienstbier et  
91 al., 2009; Mach and Lehmann, 1997). However, since then, BicD orthologs have been shown  
92 to control a diverse group of microtubule transport processes through binding to different

93 cargoes or adaptor proteins (Hoogenraad and Akhmanova, 2016; Vazquez-Pianzola and  
94 Suter, 2012).

95         Because BicD was shown to form complexes with both Chc and Dynein, both of  
96 which perform essential activities during mitosis, we set out to investigate possible *BicD*  
97 functions in spindle assembly during cell division processes. The syncytial *Drosophila*  
98 embryo's fast and synchronous mitotic divisions provide a unique system to study the  
99 function of genes involved in cell cycle regulation. Thus, using fly embryos, we found that  
100 BicD localized, like Chc, to the mitotic spindles and centrosomes and that the interaction  
101 between Chc and TACC is conserved in *Drosophila*. Additionally, using a degradFP system,  
102 to reduce the levels of BicD::GFP after egg activation, we found that BicD plays an essential  
103 role during embryogenesis where it is needed for normal progression of meiosis II and  
104 pronuclear fusion. We found that BicD is needed to correctly localize D-TACC, Clc and  
105 Msps to the meiotic II spindles. It is also required for the normal metaphase arrest of polar  
106 bodies after meiosis II completion. Consequently, spindle assembly components (SAC) were  
107 not localized to meiotic products in embryos with reduced *BicD* activity, nor was chromatin  
108 phosphorylated on histone H3. This suggests that BicD, through its role in localizing the  
109 Clathrin/D-TACC/Msps complex, is needed to stabilize the meiotic II spindle K-fibers and  
110 required for the normal function of the meiosis II checkpoint. We further report that the  
111 function of these genes in pronuclear fusion is conserved all the way to the distant nematodes.  
112 *C. elegans tac-1* and *Chc* serve similar roles in the embryo as *Drosophila tacc* and *BicD*.

113

## 114 **RESULTS**

### 115 **BicD and its cargo Clathrin localize to centrosomes and mitotic spindles during** 116 **embryogenesis**

117 Completion of female meiosis and the first mitotic cycles depend on the correct spindles  
118 formation in the developing embryo. Maternally expressed genes are involved in this process  
119 because the first zygotic transcription starts only in the 10<sup>th</sup> division cycle in the young  
120 embryo (De Renzis et al., 2007; Edgar and Schubiger, 1986). Maternal genes are also  
121 necessary for oocyte differentiation and gamete formation. Accordingly, inactivation of these  
122 genes leads either to maternal effect lethality or female sterility. Indeed, *BicD* loss-of-function  
123 mutants are female sterile because they do not produce oocytes (Ran et al., 1994). This is an  
124 obstacle for studying the role of *BicD* in the maternally controlled early mitotic divisions of  
125 the embryo. Our laboratory has developed the *BicD<sup>mom</sup>* females, a method to overcome *BicD*  
126 mutant female sterility, and analyze the protein's function in late oogenesis (Swan and Suter,  
127 1996). Using this strategy, we observed that most of the embryos laid by *BicD<sup>mom</sup>* females do  
128 not develop and arrest very early during embryogenesis (Supplementary Fig. S1A). This



129 suggests that *BicD* is also essential downstream of oocyte differentiation to complete meiosis  
130 and or progression through the early mitotic divisions.

131 To further understand whether *BicD* functions during mitosis, we analyzed its  
132 localization in methanol-fixed embryos using immunofluorescence. Methanol fixation  
133 dissolves the cytosolic pool of BicD, making insoluble pools of the protein more apparent.  
134 Surprisingly, BicD was detected on the centrosomes where it colocalized with centrosomin  
135 (Cnn), as well as on mitotic spindles (Fig. 1A). To exclude off-target recognition by the BicD  
136 antibody, we additionally analyzed embryos expressing BicD::GFP by immunofluorescence  
137 after staining them with anti-GFP. Both staining patterns were highly similar (Fig. 1B).

138 We previously reported that BicD interacts with the *Chc* messenger RNA and the *Chc*  
139 protein, and that it transports them inside the oocyte during oogenesis (Vazquez-Pianzola et  
140 al., 2014). Since *Chc* performs a moonlighting function at the mitotic spindles in vertebrates,  
141 we analyzed the expression of the *Chc* protein in *Drosophila* embryos using differently  
142 tagged *Chc* fusions that are functional (Vazquez-Pianzola et al., 2014). *Chc* was enriched  
143 apically in blastoderm embryos (Fig. 1C, *Chc*::V5 and Supplementary Fig. S1B, *Myc*::*Chc*).  
144 We could detect two different, apically enriched, signals: a diffuse one, resembling BicD  
145 distribution, and a more robust enrichment in one or sometimes two dots per cell that  
146 corresponded to the centrosomes as confirmed by their colocalization with the centrosomal  
147 marker Cnn (Fig. 1C, Supplementary Fig. S1B-C). Both immunostaining of *Chc* fusion  
148 proteins (Fig. 1C, *Chc*::V5) and live imaging of embryos expressing fluorescent *Chc* (Fig. 1D  
149 and Supplementary Fig. S1D) revealed a dynamic localization of *Chc* during the cell cycle.  
150 *Chc* was distributed in a dotted pattern in the cytoplasm during the early syncytial divisions  
151 and enriched at the centrosomes and pericentrosomal regions during the entire cell cycle.  
152 During mitosis, *Chc* becomes associated also with the astral microtubules and the mitotic  
153 spindles (Fig. 1D, Supplementary Fig. S1D). *Chc* was also observed enriched during  
154 cellularization near the plasma membrane between the nuclei, probably marking the sites  
155 where endocytic vesicles start to form (Fig. 1C) (Sokac and Wieschaus, 2008). A similar  
156 localization pattern was observed for the *Drosophila* Clathrin light chain (*Clc*) during  
157 embryogenesis (Supplementary Fig. 1E).

158 We conclude that BicD and *Chc* associate with both the mitotic spindles and the  
159 centrosomes during mitosis. Thus, the *Chc*/*Clc* complex's localization to the mitotic apparatus  
160 appears to be conserved between *Drosophila* and mammalian cells (Royle et al., 2005).  
161 Interestingly, mammalian BicD1 and BicD2 have been shown to be present at the  
162 centrosomes in mammalian cells as well (Fumoto et al., 2006). Therefore, our data suggest  
163 that *BicD* might play a yet unidentified, but evolutionary conserved role at the mitotic spindle.

164

165 **deGradFP knockdown of BicD::GFP reveals a novel, essential role for BicD during**  
166 **early embryogenesis**

167 Although *BicD<sup>mom</sup>* flies lay embryos with mitotic defects, the numbers with which these  
168 progenies survive are too small for phenotypic analyses. Thus, we designed a strategy to  
169 knock down directly the BicD protein in early embryos using the deGradFP technique  
170 (degrade Green Fluorescent Protein), a method to target fusion proteins with GFP for  
171 destruction or inactivation (Caussinus et al., 2011). For this, we took advantage of the  
172 functional genomic *BicD::GFP* construct (Paré and Suter, 2000) and constructed a new  
173 version of the deGradFP that is specifically active during embryogenesis but not oogenesis.  
174 We cloned the NSlmb-vhhGFP4 sequence (that comprises the F-box domain contained in the  
175 N-terminal region of the *Drosophila* supernumerary limbs (Slmb) protein fused to the GFP-  
176 binding nanobody VhhGFP4 sequence) described by Caussinus *et al.* (2013) under the  
177 *hunchback* (*hb*) minimal maternal promoter containing the 5'-UTR leader of the maternal 3.2  
178 Kb *hb* transcript and combined it with the *bcd* 3'-UTR (Fig. 2A) following the strategy used  
179 by Schulz and Tautz who used this to induce an artificial Hb gradient in embryos (Schulz and  
180 Tautz, 1995).

181 The *hunchback* promoter is transcribed during late oogenesis, and the mRNA will be  
182 loaded into eggs and embryos. The *bcd* 3' UTR promotes mRNA localization to the anterior  
183 pole of the oocyte and egg, and it will foster translation upon egg-laying only (Berleth et al.,  
184 1988; Driever and Nüsslein-Volhard, 1988; Sallés et al., 1994). The deGradFP construct  
185 should therefore be expressed in the early embryos but not during oogenesis. We will refer to  
186 it as *hb-deGradFP* (Fig. 2A). We corroborated the enrichment of the *deGradFP* mRNA in the  
187 embryo's anterior region from egg laying until before cellularization (Fig. 2B). This  
188 indicated that the cloned 3'-UTR of *bcd* was sufficient to direct anterior mRNA localization.  
189 However, immunostaining experiments to detect *deGradFP* expression using an anti-Lambda  
190 IgG antibody revealed that the Vhh-GFP was distributed in the entire embryo and did not  
191 form an A-P gradient (Fig. 2C). It thus appears that the deGradFP is stable and that it can  
192 diffuse or is streamed to the rest of the embryo. Even though our plan to use the embryo's  
193 posterior half as an internal control did not materialize, *deGradFP* was expressed in very  
194 early embryos. We further used it to knock down the BicD::GFP protein in young embryos to  
195 study *BicD*'s role during the very early nuclear divisions and spindle assembly.

196 Two copies of a *BicD::GFP* construct rescued the sterility phenotype and the  
197 embryonic development arrest of *BicD* loss-of-function mutant females (*BicD::GFP*, *BicD<sup>null</sup>*  
198 homozygous females) (Fig. 2D-E). However, when these females expressed 2 copies of the  
199 *hb-deGradFP* construct (*BicD::GFP*, *BicD<sup>null</sup>* ; *hb-deGradFP* homozygous females), 75% of  
200 their progeny failed to develop to late embryonic stages and did not hatch into larvae,

201 showing arrest in the very early meiotic and/or mitotic divisions as observed in embryos laid  
202 by *BicD<sup>mom</sup>* females (Fig. 2D-E, Supplementary Fig. S1A). In the following, we will refer to  
203 these mothers and their progeny as *BicD<sup>hb-deGradFP</sup>*. Embryos laid by females that expressed  
204 two copies of the *hb-deGradFP*, but also a wild-type *BicD<sup>+</sup>* (*BicD::GFP*, *BicD<sup>null</sup>* / + (CyO);  
205 *hb-deGradFP*), did not show development problems, indicating that high levels of *hb-*  
206 *deGradFP* expression are not deleterious for development on their own (Fig. 2D-E). *BicD<sup>hb-</sup>*  
207 *deGradFP* females displayed normal ovaries, and their BicD::GFP protein levels were not  
208 noticeably reduced in the ovary as assayed by immunofluorescence and Western blotting (Fig.  
209 2F-H). These results confirmed that the *hb-deGradFP* construct is not active during  
210 oogenesis. In contrast, in young *BicD<sup>hb-deGradFP</sup>* embryos, the BicD::GFP signal was clearly  
211 reduced in the entire embryo (Fig. 2G), and BicD::GFP protein levels were downregulated by  
212 50% (Fig. 2I). The fact that only a 50% reduction in the levels of BicD::GFP protein  
213 produces already visible phenotypes may be due to different reasons. One possibility is that  
214 the deGradFP might bind BicD::GFP, functionally inactivating the protein before sending it to  
215 degradation. On the other side, a BicD::GFP fraction may be already inactive and  
216 accumulates in the cell in a way that cannot get attacked by the deGradFP.

217 Measuring the expression of the *hb-deGradFP* construct by Western blotting revealed  
218 that it was indeed much higher expressed in early embryos, although low levels of expression  
219 were also seen in ovaries (Fig. 2H, I). This expression was also observed in ovaries dissected  
220 in Robbs medium, a hypotonic medium that is normally used to avoid oocyte activation  
221 (Supplementary Fig. 2A). Although we cannot rule out that some old egg chambers are  
222 activated during dissection due to physical activation, it is also possible that the sequences in  
223 the *bcd* 3'-UTR are not sufficient to fully control translation in the context of the maternal *hb*  
224 promoter and its 5'-UTR. Stage 14 (S14) oocytes are normally arrested in Metaphase I of  
225 meiosis I, till the oocyte becomes activated by its passage through the oviduct. Because  
226 *BicD<sup>hb-deGradFP</sup>* embryos arrest very early during development, we also wanted to test whether  
227 oogenesis expression of the *hb-deGradFP* construct might have affected meiosis by a  
228 potentially small reduction of *BicD* activity (Supplementary Fig. S2B-C). However, *BicD<sup>hb-</sup>*  
229 *deGradFP* S14 oocytes showed no evident problems in spindle formation or chromosome  
230 alignment in meiotic metaphase I (Supplementary Fig. S2B-C). These data suggest that the  
231 early embryonic arrest we observed in *BicD<sup>hb-deGradFP</sup>* individuals is not due to earlier meiotic  
232 defects during late oogenesis.

233  
234  
235  
236

237 ***BicD* is required for the cell cycle arrest of the male and the female meiotic products,**  
238 **and for pronuclear fusion**

239 Reduced *BicD* levels in young embryos led to an early arrest of development (Fig. 3),  
240 pointing to an essential function for *BicD* at this developmental stage. To learn more about  
241 this function, we collected 30-40 min old, fully viable control embryos and *BicD*<sup>hb-deGradFP</sup>  
242 embryos and analysed them for developmental defects (Fig. 3A). Twenty-five minutes after  
243 the eggs were laid, control embryos finished the 2<sup>nd</sup> mitotic division and contained at least  
244 four zygotic nuclei. At this early stage, normal zygotic nuclei (that are formed after the fusion  
245 subsequent division of the female and male pronuclei) reside in the interior of the embryo  
246 and, the three remaining female meiotic polar body products (mostly, but not always, fused  
247 into one rosette shaped nucleus) stay at the embryonic surface. Indeed, most embryos laid by  
248 control mothers (*BicD*::GFP, *BicD*<sup>null</sup> or *BicD*::GFP, *BicD*<sup>null</sup> / + (CyO); *hb-deGradFP*)  
249 developed normally, displaying more than four zygotic nuclei with normally looking mitotic  
250 spindles (Fig. 3A-B). However, embryos laid by *BicD*<sup>hb-deGradFP</sup> mothers arrested mostly in  
251 early development showing spindle defects (Fig. 3A, C). They mainly displayed centrally  
252 located dividing nuclei with spindle-like structures that appeared abnormal. Around 25% of  
253 these embryos were classified as “arrested with centrosomes” because they were positive for  
254 Cnn staining (Fig. 3A, an example in Fig 3Ca). These embryos contained at least one spindle  
255 displaying clear and sometimes fragmented staining for the centrosomal marker centrosomin  
256 (Cnn) at the spindle poles. Additionally, they frequently also displayed free centrosomes,  
257 positive for Cnn and associated with  $\alpha$ -tubulin, but not with DNA (example in Fig. 3Ca1).  
258 Another 35% of the *BicD*<sup>hb-deGradFP</sup> embryos possessed one or more internal acentrosomal  
259 spindle and all these spindles were negative for Cnn staining and were classified as “arrested,  
260 acentrosomal” (Fig. 3A, Cb).

261 Since centrosomes are inherited from the father, embryos arrested in early  
262 development, but displaying at least one Cnn positive spindle or free Cnn positive signals, are  
263 expected to have developed from fertilized eggs that either underwent aberrant meiosis or  
264 were arrested in the very first mitotic divisions. By contrast, embryos that arrested  
265 development without displaying Cnn signal may represent unfertilized eggs that underwent  
266 aberrant meiosis. To unambiguously discriminate between fertilized and unfertilized embryos,  
267 we additionally either monitored the presence of the sperm tail or the X and Y chromosomes.  
268 Consistently, eggs containing at least one spindle with centrosomes and or acentrosomal like  
269 spindles plus free centrosomes were mostly marked by the presence of the sperm tail  
270 (Supplementary Fig. S3A-B). In contrast, embryos displaying “acentrosomal”-like spindles  
271 and no free centrosomes rarely displayed any of these sperm tail markers, indicating that they  
272 more likely represent unfertilized eggs with aberrant meiotic products (Supplementary Fig.

273 S3A-B). *BicD*<sup>hb-deGradFP</sup> mothers are weak and easily stick to the food. This defect likely  
274 affected their mating behavior and might be the reason for the presence of unfertilized eggs  
275 laid by these females.

276 The second approach to discriminate between fertilized and unfertilized eggs was  
277 based on detecting the presence of the X and Y chromosomes by DNA *in situ* hybridization.  
278 Male embryos (marked by the presence of the Y) developed only from fertilized eggs. Male  
279 embryos from control mothers showed one dot-like signal for the X chromosome and one  
280 signal for the Y in each zygotic nucleus, and these nuclei were located in the interior of the  
281 embryo. The three polar bodies, formed after the two meiotic divisions, normally fused into a  
282 single polar body that was marked by the presence of the 3 X chromosomes (Fig. 3D). In  
283 contrast, arrested male embryos laid by fertilized *BicD*<sup>hb-deGradFP</sup> females had one internal  
284 spindle marked only by the presence of the Y chromosome and no X chromosome signal,  
285 indicating that no pronuclear fusion had occurred and that a spindle still formed from the  
286 paternal pronucleus (Fig. 3E). The male pronucleus seemed to have undergone one additional  
287 round of replication since metaphase nuclei containing two dots of the Y chromosome signal  
288 can be observed in such embryos (Fig. 3E2). They also contained one or several acentrosomal  
289 nuclei marked frequently by the presence of several dots of X chromosomal staining,  
290 suggesting that the polar bodies did not arrest in metaphase II as they normally do but  
291 underwent several cycles of DNA replication instead (example in Fig. 3E1). These results  
292 show that *BicD* is required for the female and male pronucleus' cell cycle arrest and for  
293 pronuclear fusion.

294

### 295 ***BicD* is needed for replication arrest in polar bodies and for their rosette formation**

296 To test for an essential function of *BicD* during the final phase of the meiotic divisions, we  
297 crossed *BicD*<sup>hb-deGradFP</sup> and control females to sterile XO males. This cross caused the females  
298 to lay unfertilized eggs. (Fig. 4). In wild-type unfertilized eggs, egg activation is triggered by  
299 passage through the oviduct, and this causes the eggs to complete meiosis II. In collections of  
300 0-1h old unfertilized control eggs, we observed from 1 to 4 rosette-like nuclei. These are  
301 intermediate stages of the four meiotic products' fusion process, which ultimately fused to  
302 form a single, rosette-shaped nucleus. Their presence indicates that the egg completed meiosis  
303 II. These rosette-shaped nuclei were also marked by the presence of a total number of 4 dots  
304 of X-chromosomal signal per egg, which arise from each of the four meiotic products (Fig.  
305 4A, examples in Fig. 4B). In contrast, *BicD*<sup>hb-deGradFP</sup> unfertilized eggs contained one to  
306 several nuclei forming spindle like structures, mostly with the appearance of multipolar  
307 spindles. Additionally, their DNA did not create a rosette structure that would be typical for a  
308 metaphase arrested state. Instead, these nuclei displayed partially decondensed chromatin and

309 they were irregularly shaped and lacked the  $\alpha$ -tubulin staining ring that surrounds the DNA  
310 rosette in control eggs (Fig. 4A,C). Furthermore, the X-chromosomal probe produced more  
311 than the normal four signal dots per egg, in both eggs containing only one nucleus (Fig. 4C-c)  
312 and in eggs containing several nuclei and spindles (Fig. 4C-c'). We observed eggs with more  
313 than four meiotic nuclei (like in Fig. 4Cc'), indicating that *BicD*<sup>hb-deGradFP</sup> eggs show over-  
314 replication of the meiotic products. The probe used for the DNA *in situ* experiments  
315 recognizes a repetitive region on the X-Chromosome present along 3 to 3.5 Mb. The fact that  
316 this probe detected more than four signals in each *BicD*<sup>hb-deGradFP</sup> egg, and that these signals  
317 showed different brightness and sizes might also suggest that the DNA has become  
318 fragmented and or more decondensed and that it did not arrest in a metaphase-like state as in  
319 the normal rosette structures. This replication, decondensation and or fragmentation of the  
320 meiotic DNA was not restricted to the sex chromosomes because we observed analogously  
321 additional signals when using a probe for the 2<sup>nd</sup> chromosome (Supplementary Fig. S4). All  
322 together, these results indicate that BicD is required for both the cell cycle arrest and the  
323 formation of the typical rosette-like structures of the polar bodies.

324

### 325 **Role of BicD in SAC and metaphase arrest of female meiotic products**

326 After meiosis II is completed, *Drosophila* polar bodies remain arrested in a metaphase-like  
327 state. Thus, we analyzed if the meiotic products in *BicD*<sup>hb-deGradFP</sup> unfertilized eggs were  
328 properly arrested in metaphase by monitoring the presence of the mitotic marker Phospho-  
329 Histone 3 (PH3). In wild-type unfertilized eggs, the four meiotic products, which fused into a  
330 single rosette, showed strong PH3 staining along the entire chromosomes, indicating that they  
331 were arrested in a metaphase-like state (Fig. 4Da-Ea). In contrast, in *BicD*<sup>hb-deGradFP</sup> eggs  
332 showing one rosette-like structure, the PH3 staining was not localized along the entire  
333 chromosomes but only enriched at the pericentromeric region (Fig. 4 Db-Eb) instead.  
334 Moreover, compared to control eggs, rosette-like structures in *BicD*<sup>hb-deGradFP</sup> eggs showed an  
335 increased number of CID-positive dots suggesting that female meiotic products underwent  
336 extra rounds of DNA replication (compare Fig. 4Da with 4Db).

337 Rosette-like structures in *BicD*<sup>hb-deGradFP</sup> eggs did also not form the typical tubulin ring  
338 surrounding the chromosomes observed in wild-type eggs, and interestingly, DNA extended  
339 beyond this tubulin ring, and this DNA was negative for PH3 staining (Fig. 4Ea, b, c). In the  
340 normal situation, Histone H3 phosphorylation starts in pericentromeric heterochromatin  
341 regions at the onset of mitosis and then spreads along the entire length of chromosomal arms,  
342 reaching its maximal abundance during metaphase. This is then followed by a rapid decrease  
343 upon transition to anaphase (Sawicka and Seiser, 2012). Thus, PH3 staining confined to the  
344 pericentromeric region in *BicD*<sup>hb-deGradFP</sup> polar bodies suggests that these nuclei are not



345 properly arrested or are released from metaphase arrest. Furthermore, *BicD*<sup>hb-deGradFP</sup> eggs  
346 possessing several meiotic products (Fig. 4Ec,c'), showed that not all of these nuclei were  
347 positive for PH3 staining (Fig. 4Ec2-3,c') further strengthening the idea that these nuclei are  
348 over-replicating due to a failure to arrest in metaphase.

349 The metaphase arrest of polar bodies has been shown to depend on the activation of  
350 the spindle assembly checkpoint (SAC) pathway (Défachelles et al., 2015; Fischer et al.,  
351 2004; Pérez-Mongiovi et al., 2005). We, therefore focused on analyzing the localization of  
352 two well-conserved orthologs of the SAC pathway, BubR1, and Mad2 (Fig. 5). These proteins  
353 associate with unattached kinetochores and in the case of BubR1, also to kinetochores lacking  
354 tension. By inhibiting the anaphase-promoting complex (APC/C) they are essential to  
355 maintain the metaphase arrest. BubR1 was clearly present at polar body kinetochores in the  
356 wild type (100%, n=23) and in the control *BicD*::GFP rescued eggs (93%, n=27) (Fig. 5Aa).  
357 However, in 43% of the *BicD*<sup>hb-deGradFP</sup> eggs, the meiotic products failed to recruit BubR1 to  
358 the kinetochores (n=35). The absence of BubR1 from the polar body kinetochores was  
359 observed in eggs where polar bodies were fused into a single rosette (Fig. 5Ab) and in eggs  
360 showing many additional meiotic products (Fig. 5Ad, d'). The rest of the *BicD*<sup>hb-deGradFP</sup> eggs  
361 showed either normal BubR1 recruitment (40%) or only a weak signal for kinetochore BubR1  
362 (17%, Fig. 5Ac). These data indicate that the failure to activate or maintain the metaphase  
363 arrest of polar bodies in the absence of *BicD* is probably due to a failure to recruit the SAC  
364 components to the kinetochores or maintain their association. The fact that half of the polar  
365 bodies still recruited SAC components might also suggest that these nuclei are cycling in and  
366 out of the metaphase arrest, duplicating their chromosomes. Similar results were obtained for  
367 Mad2, where 69 % of the *BicD*<sup>hb-deGradFP</sup> eggs analyzed did not show recruitment of Mad2 to  
368 the polar bodies (n=48; Fig. 5B). Altogether, these results suggest that in *BicD*<sup>hb-deGradFP</sup> eggs,  
369 the meiotic II products do not correctly arrest in metaphase due to a failure to activate or  
370 maintain the SAC.

371

### 372 **Chc is enriched at the meiotic spindle**

373 Since embryos with reduced levels of *BicD* showed meiotic defects after release from MII  
374 arrest, we asked whether *BicD* and its interactor *Chc*, which we found previously to localize  
375 to mitotic spindles, are also present at the meiosis II spindle. Indeed, *Chc*::mCherry clearly  
376 localized to the meiotic spindle (Fig. 6A). *BicD* and the *BicD*::GFP, were also present around  
377 the meiotic spindle. However, compared to the signal intensities in the cytoplasm, no  
378 enrichment could be observed, even though a specific *BicD* signal was observed in the  
379 meiotic spindle region (Fig. 6B).

380



## 381 **D-TACC, Msps and Clc localization to the tandem meiotic spindles depends on BicD**

382 The analysis of Chc distribution turned out difficult due to the lack of useful antibodies for  
383 immunostaining. Localization of tagged proteins was also irreproducible due to the high  
384 cytoplasmic staining and side effects of tagged Chc proteins overexpression (Fig. 9F-G).  
385 However, mammalian Chc forms a complex with the two proteins TACC3 (transforming  
386 acidic coiled-coil containing protein 3) and ch-TOG (colonic and hepatic tumor  
387 overexpressed gene) at the mitotic spindles. The presence of these proteins at the spindle is  
388 interdependent and is needed for stabilizing the kinetochore fibres by forming inter MT-  
389 bridges that are essential for normal progression through mitosis in vertebrate cell (Royle,  
390 2012; Royle et al., 2005). We then decided to follow the localization of the *Drosophila*  
391 homologs of TACC3 (called D-TACC) and ch-TOG (called Msps (Mini spindles)) at the  
392 meiotic spindles. To pinpoint the first meiotic defects, we focused on the very early stages of  
393 meiosis II in eggs that were just released from the MI arrest. In wild-type MII and anaphase II  
394 (AII) spindles, D-TACC and Msps were present on tandem spindles, and they were enriched  
395 at the central aster (Fig. 6C, D arrowheads). In both metaphase and anaphase, D-TACC is  
396 additionally weakly enriched at the spindles' equator, where the MT plus ends are located  
397 (Fig. 6C, arrows). On the other hand, Msps was clearly enriched along both arms of the  
398 tandem spindles but stained more strongly the minus ends at the spindle poles (Fig. 6D,  
399 arrows). In *BicD<sup>hb-deGradFP</sup>* embryos, D-TACC and Msps localization along the tandem  
400 spindles was generally clearly reduced compared to the control spindles (Fig. 6C, D).  
401 However, like in control spindles, D-TACC and Msps still showed enrichment at the central  
402 aster in *BicD<sup>hb-deGradFP</sup>* embryos (Fig. 6C, D).

403 To follow clathrin localization more directly, we stained the embryos for Clathrin  
404 light chain (Clc). In metaphase II, Clc localized to the spindle and the central aster (Fig. 6E).  
405 However, Clc showed a robust signal in the cytoplasm, too, which made spindle signal  
406 detection more challenging. Due to the meiotic spindle's variable position, and the depth of  
407 the sample, it was not possible to analyze Clc localization at the different regions of the  
408 meiotic spindles just by analyzing the Z-stack maximal confocal projection images. The high  
409 cytoplasmic signal in the first planes masked the localization at the spindle in the deeper  
410 planes. However, applying a bleach correction to the Clc signal in each Z-frame (see  
411 Methods), allowed us to detect the miss-localization of Clc on the tandem spindles of *BicD<sup>hb-</sup>*  
412 *deGradFP* eggs. Similar to the localization of D-TACC and Msps, Clc showed an unusual, strong  
413 accumulation at the central aster compared to the levels observed along the spindle (Fig. 6E,  
414 E'). These results suggest that BicD is needed to properly localize D-TACC and Msps on the  
415 meiotic II spindles, most probably through its effect on localizing or transporting Clathrin  
416 along microtubules.

417 **Evidence for mutually exclusive complexes of BicD/Chc and D-TACC/Chc**

418 BicD and Chc proteins form a complex and have been shown to interact directly in  
419 *Drosophila* (Li et al., 2010; Vazquez-Pianzola et al., 2014). In mammals, Chc interacts  
420 directly with TACC3, and the interaction depends on the phosphorylation of Ser<sup>552</sup> of TACC3  
421 by Aurora A (Fu et al., 2010; Lin et al., 2010). However, it is not known whether the  
422 interaction between D-TACC and Chc is conserved in *Drosophila*. We, therefore, tested the  
423 interaction in a yeast 2-Hybrid (Y2H) assay and by immunoprecipitation experiments (Fig.  
424 7A-B). Indeed, full-length *Drosophila* Chc interacts with D-TACC in both assays.

425 In the mammalian system, the minimal region of Chc22 that interacts with  
426 mammalian TACC3 was identified as amino acids 331-542 (Lin et al., 2010). However, the  
427 corresponding region of *Drosophila* Chc (aa 329-542) did not show an interaction with D-  
428 TACC in our assays (Fig. 7A). The same Chc fragment was also unable to bind BicD  
429 (Supplementary Fig. S5A). However, a longer fragment of *Drosophila* Chc that contains  
430 additional residues at the C-term (aa 329-803) interacted with D-TACC almost as strongly as  
431 the full-length protein (Fig. 7A). Interestingly, this fragment was shown previously to contain  
432 the minimal region needed to bind *Drosophila* BicD (Li et al., 2010) (Supplementary Figure  
433 S5B). The same region of Chc interacted in our assays with the BicD CTD (C-terminal  
434 domain), a truncated version of BicD that normally interacts stronger with its cargoes because  
435 it does not contain the BicD fold back domain (Supplementary Fig. S5B) (Li et al., 2010).  
436 Since the sequences required for the binding of *Drosophila* Chc to D-TACC and to BicD are  
437 overlapping, Chc/BicD and Chc/D-TACC might only exist as mutually exclusive protein  
438 complexes. However, because Chc normally acts as a trimer, higher-order complexes of the  
439 three Chc molecules could theoretically contain BicD or D-TACC, or both. Surprisingly, the  
440 interaction of Chc with D-TACC was not abolished when the conserved Ser residue targeted  
441 by the Aurora A kinase was mutated to Alanine (Ser<sup>863</sup> in D-TACC, corresponds to Ser<sup>552</sup> of  
442 the human protein, Fig. 7A, Supplementary Fig. S5C). Nevertheless, the phosphomimetic  
443 mutation Ser<sup>863</sup> > Asp<sup>863</sup> D-TACC increased its interaction with full-length Chc  
444 (Supplementary Fig. S5C). These results suggest that phosphorylation of Ser<sup>863</sup> may not be a  
445 prerequisite for the interaction of full-length D-TACC with Chc at least in the Y2H system.  
446 Still, it could enhance the interaction during mitosis and meiosis when the kinase is active,  
447 suggesting a significant and conserved role for the D-TACC/Chc complex and D-TACC  
448 phosphorylation during evolution.

449 The interaction of D-TACC with full-length Chc was even observed under very  
450 stringent Y2H conditions (medium -L, -W, -H, -a; Supplementary Figure S5C). In contrast,  
451 the interaction between Chc and BicD was only visible under less stringent conditions  
452 (medium -L, -W, -H +3 mM 3AT; Supplementary Fig. S5A, (Cagney et al., 2000)),

453 suggesting that Chc interacts stronger with D-TACC than with BicD in this system. This is  
454 also supported by the immunoprecipitation experiments using embryo extracts. Using extracts  
455 expressing a Myc::Chc fusion protein, Myc::Chc was observed at low levels in BicD IPs. In  
456 contrast, the presence of BicD was not detected in the reverse IPs (with anti-Myc antibodies)  
457 as previously reported (Fig. 7B) (Vazquez-Pianzola et al., 2014). This is conceivable due to  
458 their weak interaction or because the Myc tag interferes with the binding sites. In contrast, D-  
459 TACC was strongly pulled down with anti-Myc antibodies from extracts containing the  
460 Myc::Chc fusion protein. On the other hand, no interaction was observed between D-TACC  
461 and BicD either by IP or using the Y2H system (Fig. 7B and Supplementary Fig. S5D).

462

### 463 **D-TACC is required, like BicD, for pronuclear fusion and cell cycle arrest of the male** 464 **pronucleus**

465 Mothers expressing the mutant *d-tacc* allele *d-tacc<sup>1</sup>* are sterile. They lay eggs with reduced D-  
466 TACC protein levels, and the embryos arrest development early on (Gergely et al., 2000). The  
467 analysis of the 70% of the embryos that completely failed to develop suggested that they were  
468 arrested in the first mitotic divisions. We performed DNA *in situ* hybridization experiments to  
469 test for the X and Y-chromosomes' presence in these mutant embryos. Whereas wild-type  
470 male embryos showed signals for both chromosomes in each of their zygotic nuclei (Fig. 8A),  
471 most of the male embryos laid by *d-tacc<sup>1</sup>/ Df(3R)110* females had one internal nucleus  
472 strongly marked with two dots corresponding to the Y-chromosome and no X-chromosomal  
473 signal (Fig. 8B, upper panel, arrow) suggesting that the male pronucleus has undergone an  
474 additional S-phase. X-chromosome signals strongly marked the remaining embryonic nuclei.  
475 Even though they showed an additional, unspecific weak signal for the Y-chromosome that is  
476 also observed in the wild-type embryos (see figure legend), this pattern seems to represent  
477 polar bodies fused into two nuclei with a normal amount of four dots of X. A smaller fraction  
478 of male embryos displayed many Hoechst-positive nuclei-like structures marked only by the  
479 presence of the Y-chromosome (Fig. 8B, lower panel). No X-chromosome signal was evident  
480 in them. These embryos also contained polar bodies fused into one to four rosette-like nuclei  
481 marked by the presence of X-chromosome signals. These data show that in embryos with  
482 reduced TACC activity levels (Fig. 8), pronuclear fusion is compromised, and the paternal  
483 DNA undergoes additional rounds of replication as we observed in *BicD<sup>hb-deGradFP</sup>* embryos  
484 (Fig. 3D-E). However, unlike what we observed in *BicD<sup>hb-deGradFP</sup>* eggs (Fig. 3D-E), in *d-*  
485 *tacc<sup>1</sup>/ Df(3R)110* embryos, we did not detect additional female meiotic products and the  
486 female-derived nuclei always displayed 4 X-chromosomal signals in total, indicating that the  
487 female meiotic products did not undergo an extra round of replication (Fig. 8B). Altogether,

488 these data show that in very early development, BicD and D-TACC are involved in common  
489 pathways that regulate pronuclear fusion and metaphase arrest of the male pronucleus.

490

491 ***BicD* is needed for correct bipolar spindly assembly and centrosome integrity in**  
492 ***Drosophila* tissue culture cells**

493 Because embryos with reduced levels of BicD were arrested before zygotic divisions, we  
494 were unable to analyze BicD and Chc roles during embryonic mitosis. Thus, we decided to  
495 study the role of BicD in mitosis in *Drosophila* tissue culture cells. Efficient depletion of  
496 BicD, Chc and Clc in S2 cells was observed four days after RNAi treatment (Fig. 9A).  
497 Depleting either BicD, Chc, or Clc caused an increase of cells containing more than two  
498 centrosomes or fragmented centrosomes compared to cells treated with a control RNAi  
499 against GFP (Fig. 9B). An increase of cells showing multipolar spindles was also observed  
500 upon RNAi treatment against these mRNAs (Fig. 9B). Examples of the phenotypes observed  
501 are depicted in Fig. 9C. The observed increase in mitotic phenotypes was similar to the rates  
502 observed in human cells (Foraker et al., 2012). The fact that knockdown of *BicD*, *Chc*, and  
503 *Clc* showed similar mitotic defects suggests that these interacting proteins are needed for the  
504 same steps during mitosis.

505 Double KD of *Chc* and *Clc* neither enhanced nor rescued the defects observed upon  
506 single KDs (Fig. 9D-E, compare with Fig. 9B). This result is consistent with the fact that  
507 single KDs of either *Clc* or *Chc*, reduced the levels of both proteins as observed by WB (Fig.  
508 9A and Supplementary Fig. S6). On the other hand, double knockdown of either *BicD* and  
509 *Chc* or *BicD* and *Clc* did not enhance the mitotic defects observed upon single knockdowns  
510 but partially rescued them (compare Fig. 9D-E with Fig. 9B). These results are consistent  
511 with the hypothesis that reducing the levels of *Chc* or *Clc* may partially rescue the phenotypes  
512 observed upon *BicD* KD since less Clathrin will become mislocalized on the spindle.

513

514 ***In vivo* importance of proper BicD/Clathrin ratio**

515 The *in vitro* experiments suggested that the cellular balance between BicD and Clathrin might  
516 be necessary during mitosis. We tested this *in vivo* by overexpressing *Chc* in embryos with  
517 slightly reduced functional BicD and found that this indeed enhanced the phenotype (Fig. 9F-  
518 G). Homozygous null females were rescued with two copies of the BicD::GFP transgene and  
519 expressing only one copy of the *hb-deGradFP* construct (*BicD::GFP*, *BicD<sup>null</sup>* ; *hb-*  
520 *deGradFP-bcd 3'UTR/+*) laid embryos that developed normally and hatched into larvae (Fig.  
521 9F-G). However, when these females also expressed a copy of a *Chc* transgene under the  
522 control of the strong maternal tubulin promoter, 80% of their progeny failed to hatch as larvae  
523 and, instead, arrested in early development (Fig. 9F-G). Overexpression of this *Chc* construct

524 alone did not produce visible phenotypes in embryos, suggesting that high levels of Chc in a  
525 background that does not allow correct localization of Chc along MTs, is responsible for the  
526 phenotype.

527

### 528 **Requirements for meiosis and pronuclear fusion for *C. elegans bicd-1*, *chc-1* and *tac-1***

529 Our results indicate that pronuclear fusion requires *BicD* and *tacc* in *Drosophila*. These  
530 proteins might have a direct role in pronuclear fusion or, alternatively, be required for  
531 previous steps of oocyte formation, as BicD is necessary for normal completion of meiosis II.

532 To find out whether BicD and the components of the Clathrin/TACC/ch-TOG complex play a  
533 conserved role in meiosis and pronuclear fusion, we turned to *C. elegans*, which, besides,  
534 allowed us to study these processes in real-time (Laband et al., 2018).

535 In a normally developing zygote, the female pronucleus lies in the anterior part of the  
536 embryo while the male pronucleus and its two associated centrioles define the posterior pole  
537 (Fig. 10A). Because the female pronucleus moves faster towards the posterior pole than the  
538 male pronucleus moves in the opposite direction, the two nuclei meet in the embryo's  
539 posterior half. After centration and rotation, both nuclei move anteriorly, and the first mitotic  
540 spindle forms around the center of the zygote along the A-P axis. This process is readily  
541 visible in strains expressing histone H2B::mCherry and  $\alpha$ -tubulin::GFP. Almost all embryos  
542 that were grown on either regular food (6/6) or control RNAi food supplied with empty vector  
543 (14/15) showed the expected progression from meiosis to the formation of the first mitotic  
544 spindle. (Fig. 10A).

545 Next, we followed pronuclear fusion in knock-out mutants and or RNAi knock-  
546 downs of the homologs of *tacc*, *Chc* and *BicD* (*tac-1*, *chc-1*, and *bicd-1*, respectively)  
547 (Kamath and Ahringer, 2003; Laband et al., 2018). Knock-down of *tac-1* led to both meiosis  
548 and pronuclear fusion defects (Fig. 10B-C), as previously described using DIC microscopy  
549 (Bellanger et al., 2007). Two out of five *tac-1(RNAi)* embryos showed abnormal meiosis with  
550 delayed polar body extrusion and no pronuclear fusion. The male pronucleus formed a spindle  
551 on its own at the posterior pole, and both pronuclei met at the posterior pole forming a  
552 common spindle without pronuclear fusion (Fig. 10B). In the other embryos, meiosis  
553 appeared normal, yet female pronuclear migration was defective, and pronuclei similarly did  
554 not fuse (2/5 embryos analyzed). In these embryos, the male pronucleus formed a spindle at  
555 the posterior pole, while the female pronucleus never migrated to the posterior (Fig. 10C).  
556 Together, this suggests a conserved role for the *tacc* homolog *tac-1* in pronuclear fusion (Fig  
557 10B-C).

558 Most homozygote *chc-1(tm2866)* null mutant progeny did not hatch (6/10). The  
559 animals that hatched arrested development at various stages. It is possible that these managed

560 to survive to hatch with a maternal contribution from their balanced mother. Laid embryos  
561 displayed an abnormally elongated shape. Similarly, animals fed with *chc-1* dsRNA food  
562 looked sick and carried few progenies in the uterus. In the few living *chc-1* (RNAi) embryos,  
563 we observed arrested meiotic metaphases with a single meiotic spindle (2/6 embryos; Fig.  
564 10F) and lack of pronuclear fusion with delayed migration and lack of centration of the  
565 female pronucleus (2/6 embryos; Fig. 10D). Additionally, one embryo showed a recapture of  
566 the polar body by the mitotic spindle followed by its nuclear fusion to the anterior blastomere  
567 of the 2-cell stage (Fig. 10G). The remaining embryo showed normal development. Together,  
568 this highlights the importance of *C. elegans chc-1* for oogenesis and development, as  
569 observed in *Drosophila Chc* (Vazquez-Pianzola et al., 2014).

570 Finally, we tested the phenotype of the *C. elegans BicD* homolog. 8 out of 10 *bicd-*  
571 *1(tm3421)* homozygous embryos did not hatch. This is consistent with *bicd-1* being an  
572 essential gene like *chc-1*. Moreover, 20% of hatched animals died at the adult stage without  
573 progeny, suggesting again that the maternal contribution rescued their embryonic  
574 development. Feeding animals with dsRNA directed against *bicd-1* led to delayed pronuclear  
575 migration of the female pronucleus in a fraction of the embryos (3/10; Fig. 10E) and, although  
576 both pronuclei ultimately met at the posterior, they neither fused nor moved towards the  
577 center of the embryo, a phenotype similar to the one observed in *chc-1(RNAi)* animals  
578 (compare Fig. 10D and E). The fact that meiosis and or pronuclear migration and fusion are  
579 compromised when *tac-1*, *chc-1* and *bicd-1* function is compromised in *C. elegans* and  
580 *Drosophila* embryos, suggest an evolutionarily conserved role for the three proteins for  
581 meiosis and pronuclear fusion.

582

## 583 **DISCUSSION**

### 584 **A conserved role of Chc in spindle assembly in lower eukaryotes**

585 Vertebrate Chc has an essential function during mitosis as part of the Chc/Tacc/ch-Tog  
586 complex. However, while Chc is conserved across eukaryotes, reports of its role at the mitotic  
587 spindle have been limited to vertebrates (human, rat, mouse, and *Xenopus*) and plants (Fu et  
588 al., 2010; Lin et al., 2010; Royle et al., 2005; Tahara et al., 2007; Yamauchi et al., 2008).  
589 Here, we found that *Drosophila* Chc is present at mitotic and meiotic spindles, and that  
590 depletion of Chc in *Drosophila* cells leads to aberrant mitosis. We also found that *Drosophila*  
591 Chc interacts directly with D-TACC and that knocking down *tac-1* and *Chc-1* homologs in *C.*  
592 *elegans* leads to meiotic and early mitotic phenotypes. Our observations show that these  
593 proteins have a conserved function at invertebrate spindles and that they probably act as part  
594 of a conserved complex.

595



596 **A useful strategy to study the effect of lethal or female sterile mutations in early**  
597 **embryogenesis reveals novel requirements for *BicD* in meiosis**

598 We also found that BicD, another partner of Chc, is also present at the mitotic spindles and  
599 that cells depleted of BicD also showed mitotic phenotypes. Since *BicD*<sup>null</sup> mutants rarely  
600 survive and are sterile, we set up a strategy based on the deGDradFP technique to assess its  
601 role during early embryonic divisions. The deGDradFP construct was expressed under the  
602 control of a maternal *hunchback* promoter and with *bcd* 3'-UTR sequences that prevent  
603 translation of the GFP nanobody mRNA until egg activation. Using this strategy, we  
604 discovered that *BicD* plays an essential role during early embryogenesis, where it is essential  
605 for meiosis II progression. Combined with the CRIPSP-Cas9 strategy first to produce  
606 functional GFP tagged versions of the proteins of interest, the construct designed in this paper  
607 could be useful to study the role of other female-sterile and lethal mutations during very early  
608 development (Nag et al., 2018).

609

610 ***BicD* is involved in correct meiosis II spindle assembly and pronuclear fusion**

611 Embryos with reduced levels of BicD arrest development displaying aberrant meiotic  
612 products and no pronuclear fusion. Furthermore, localization of the Chc partners, D-TACC,  
613 Msp, and Clc to the meiotic II spindle was compromised in embryos with reduced BicD  
614 levels. Thus, we discover a novel role for Chc and probably the Chc/D-TACC/Msp complex  
615 in forming the female *Drosophila* meiotic spindle. Knocking down in *C. elegans* embryos  
616 *tac-1* and *Chc-1* also led to meiosis problems, indicating a conserved role for this complex for  
617 the correct assembly of the female meiotic spindle. Our results also revealed an essential and  
618 conserved role for *Drosophila* D-TACC and *BicD* and *C. elegans* *chc-1*, *tac-1* and *bicd-1* for  
619 pronuclear fusion. This function might either be required indirectly, through its role in  
620 meiosis, and or the complex might play a more direct role in pronuclear migration, which is  
621 known to depend on Dynein and MTs in bovine, primate, and *C. elegans* embryos (Gönczy et  
622 al., 1999; Payne et al., 2003).

623

624 **Connecting *BicD* to the SAC pathway**

625 In higher animal cells, all kinetochores start mitosis unattached, and the checkpoint signal is  
626 constitutively present due to the recruitment of the SAC pathway components to kinetochores  
627 that are unattached or are under insufficient tension. The SAC complex is present until the  
628 checkpoint is satisfied, at which time it is shut off, and cells enter anaphase. One mechanism  
629 that triggers the checkpoint's silencing is the movement of several checkpoint proteins from  
630 kinetochores along microtubules to the spindle poles in a dynein-dependent manner. In human



631 cells, depletion or chemical inhibition of Chc and the use of Aurora A inhibitors prevent the  
632 TACC/Clathrin complex from binding to the mitotic spindles. This affects K-fiber formation  
633 and leads to defective chromosome congression to the metaphase plate. As a consequence, the  
634 SAC becomes persistently activated (Rieder and Maiato, 2004; Royle et al., 2005).  
635 Impairment of MT motors, such as dynein, as well as interference with MT dynamics,  
636 persistently activates the SAC, too (Rieder and Maiato, 2004). The proteins involved in this  
637 process are highly conserved from yeast to humans, and although less robust, the SAC control  
638 has also been found to be active during meiosis (Marston and Wassmann, 2017).

639 Interestingly, in *Drosophila* mutants for several conserved orthologs of the SAC  
640 pathway (*Rod*, *mps1* and *BubR1*), polar bodies cannot remain in their SAC-dependent  
641 metaphase-like state and decondense their chromatin (Défachelles et al., 2015; Fischer et al.,  
642 2004; Pérez-Mongiovi et al., 2005). Furthermore, polar bodies have been shown to cycle in  
643 and out of M-phase, replicating their chromosomes. Two mechanisms could explain the  
644 replication and or decondensation of polar bodies observed in *BicD*<sup>hb-deGradFP</sup> embryos.  
645 Although we do not have any experimental evidence, BicD could be needed to recruit the  
646 SAC components to kinetochores directly. Alternatively, dynein motors have been shown to  
647 physically transport SAC components away from kinetochores along microtubules (Basto et  
648 al., 2004; Howell et al., 2001; Wojcik et al., 2001). Because normal BicD binds dynein, we  
649 expect that, if BicD acts as a link to transport SAC components, in the absence of BicD  
650 function, their movement away from the kinetochores would be affected, causing the SAC to  
651 remain persistently activated. However, based on our finding that BicD is needed to localize  
652 the TACC/Msps complex to the meiotic II spindles, we favor the hypothesis that in the  
653 absence of BicD, the stability of the K-fibers is compromised, and this leads to persistent  
654 activation of the SAC pathway.

655 Persistent activation of the SAC might lead to metaphase arrest, preventing anaphase  
656 onset and delay meiosis (D-Meiosis). However, at least during mitosis, this delay is known to  
657 be rarely permanent. Most cells that cannot satisfy the SAC, ultimately escape D-mitosis and  
658 enter G1 as tetraploid cells by a mechanism that is poorly understood (Rieder and Maiato,  
659 2004). Similarly, mechanisms defining these cells' subsequent fate that will either die or  
660 continue replicating are not well known (Rieder and Maiato, 2004). Thus, we suggest that in  
661 embryos with reduced *BicD* function, meiotic II kinetochore microtubule attachment might be  
662 compromised, and the SAC pathway constantly activated, thus delaying meiosis. However, at  
663 one point, they might escape the metaphase II arrest and enter into cycling in and out of M-  
664 phase, replicating their chromosomes and de-condensing their chromatin. The fact that  
665 meiotic products in *BicD*<sup>hb-deGradFP</sup> embryos show either no or only pericentromeric PH3  
666 staining and that polar body nuclei are replicating, support the notion that these nuclei are on  
667 an in-out metaphase arrest phase. This is also supported by the finding that in around half of

668 the *BicD*<sup>hb-deGradFP</sup> embryos the meiotic products failed to stain for the SAC components  
669 BubR1 and Mad2. That delaying of mitosis due to a persistently activated SAC might occur  
670 also in mitotic embryos with reduced BicD levels is supported by the observation that in the  
671 few *BicD*<sup>hb-deGradFP</sup> embryos that go through the first mitotic divisions, most (70%) were found  
672 to be in metaphase compared to the 20-30% control embryos that were in metaphase  
673 (Supplementary Fig. S7).

674 BicD also interacts with Polo (Mirouse et al., 2006), a kinase that supports SAC  
675 activation during mitosis by phosphorylating the key components of the pathway, Mps1  
676 and PLK1, in different species (Conde et al., 2013; Espeut et al., 2015; Ikeda and Tanaka,  
677 2017; Schubert et al., 2015). Interestingly, *Drosophila* embryos derived from *polo*<sup>l</sup> mutant  
678 mothers show abnormal meiosis II spindle assembly with compromised pronuclear fusion,  
679 similar to what we observed in *BicD*<sup>hb-deGradFP</sup> embryos (Riparbelli et al., 2000). However,  
680 although *polo*<sup>l</sup> polar bodies arrested in metaphase, like those in *BicD*<sup>hb-deGradFP</sup> eggs, they  
681 underwent many more rounds of division cycles populating the embryo surface in *polo*<sup>l</sup>  
682 mutants. We did not observe a BicD enrichment at kinetochores, suggesting that it might not  
683 play a direct role in Polo recruitment and SAC activation at the kinetochores. However,  
684 another intriguing hypothesis is that BicD may play a role in removing Polo from the  
685 kinetochores to allow anaphase onset. Whether the disruption of the Polo-BicD interaction  
686 contributes to some of the phenotypes we observed upon the BicD KD requires further  
687 investigation and goes beyond the scope of this study.

688 Mitotic proteins that activate or inhibit the SAC, such as aurora A kinase and kinesin  
689 spindle protein (KSP; also known as EG5), respectively, have been targets for developing  
690 chemotherapy drugs (Jackson et al., 2007). Following activation or inhibition of the SAC  
691 pathway, these drugs reduce tumor volume *in vitro* either by triggering cell death or inhibiting  
692 tumor growth (Jackson et al., 2007; Rieder and Maiato, 2004). Recently, the small molecule  
693 pitstop 2 that binds to the Chc terminal domain (TD) has been shown to induce mitotic  
694 phenotypes consistent with clathrin inhibition. In addition, it displayed a specific anti-  
695 proliferative and cytotoxic activity in dividing cancer cells, but not towards dividing non-  
696 cancer cells (Kleist et al., 2011; Smith et al., 2013). However, pitstop 2 also inhibited clathrin-  
697 mediated endocytosis, suggesting that it could have secondary effects in clinical trials, and it  
698 was not as potent as the inhibitor of Aurora A, MLN8237, at inducing aberrant mitotic  
699 phenotypes, inhibiting cell proliferation, and inducing cell death (Kleist et al., 2011). Pitstop 2  
700 is not expected to affect the binding of Chc to TACC, because this interaction is mediated by  
701 the Ankle domain of Chc. Thus, it will be interesting to know whether the generation of novel  
702 analogs that target the Ankle domain of Chc, which binds to both BicD and TACC, will act as  
703 a more potent anticancer drug.

704

705 **Model for a role of BicD at the meiotic spindle**

706 TACC and Msps orthologs are MT plus end-tracking proteins (Gutiérrez-Caballero et al.,  
707 2015; Lucaj et al., 2015; Nwagbara et al., 2014; Rutherford et al., 2016). In addition to  
708 phosphorylation of Ser<sup>552</sup> of TACC3 by Aurora B, *Drosophila* D-TACC is phosphorylated by  
709 Aurora A at Ser863. This phosphorylation allows D-TACC to interact directly with the minus  
710 ends of the MTs and to further recruit Msps to stabilize the MT minus ends (Barros et al.,  
711 2005; Lee et al., 2001). D-TACC interaction with the MT minus ends does not depend on Chc  
712 (Gutiérrez-Caballero et al., 2015). The direct association of the TACC/Msps complex with the  
713 minus end of MTs could explain why localization of clathrin, TACC, Msps is less affected in  
714 the central aster of the meiotic II spindles where both MT plus and minus end-proteins are  
715 enriched (Riparbelli and Callaini, 2005). Based in this and our findings, we also hypothesize  
716 that during assembly of the meiosis II spindle, D-TACC binds directly to the MT plus ends  
717 and becomes stabilized along the spindle by its interaction with Chc.

718 BicD, on the other hand, can also recruit Chc to the microtubules through its  
719 association with dynein, moving Chc towards the microtubule minus ends. In the absence of  
720 BicD, Chc cannot be recruited or moved in a minus end direction along the spindle. Thus, a  
721 D-TACC/Clathrin/Msps complex cannot be stabilized along the spindle or be dynamically  
722 active at the spindle, and its localization along the spindle becomes compromised. Although  
723 we did not find evidence for the ternary complex TACC/Chc/BicD, it is still possible that the  
724 three proteins are part of a larger complex because Chc normally acts as a trimer with Clc  
725 (triskelion). In this complex, each Chc might interact with either BicD or D-TACC. A mixed  
726 complex could be formed, and BicD might be essential for the movement of Chc and  
727 TACC/Chc along the spindle via the interaction of BicD/Chc in the same trimer. Since the  
728 interaction between D-TACC and Chc is stronger than the interaction between BicD and Chc,  
729 as our two-hybrid system data suggest, then, once near the spindle, formation of the complex  
730 between D-TACC and Chc at the spindle could be favoured, and the complex could stabilize  
731 the K-fibres. This could explain the fact embryos laid by mothers overexpressing Chc in a  
732 background where BicD is reduced down to levels that do not produce visible phenotypes on  
733 their own (one copy of the deGRadFP construct with two copies of BicD::GFP) are also  
734 arrested in early development. Limited BicD activity in these embryos might be insufficient  
735 to transport the high levels of Chc or the Chc/TACC complex efficiently to the minus ends of  
736 the MTs and to stabilize the complex along the meiotic spindle. This model can also explain  
737 the effects we observed in *Drosophila* cells. In this case, double knockdown of *Chc* and *BicD*  
738 produced fewer mitotic defects than the single knockdown of the same proteins. Reducing  
739 both proteins' levels simultaneously could favor the movement of the complex since less Chc  
740 will be available for binding TACC and become un-localized.

741 To conclude, we found that the lack of BicD affects recruitment of the Clathrin/ D-  
742 TACC/ Msps complex to the spindle. This phenomenon might result in a loss of K-fibre  
743 tension that impairs normal SAC inactivation. Consequently, the meiotic products then would  
744 enter a continuous abnormal cycle of SAC activation and metaphase arrest, followed by a  
745 SAC deactivation and cell cycle progression, replicating their chromosomes. This model  
746 would explain the concomitant meiotic arrest phenotype, associated with abnormal replication  
747 of the meiotic products and early developmental arrest that we observed in *BicD*<sup>hb-deGradFP</sup>  
748 embryos. Thus, our results show that *BicD* performs a key activity in assembling of the  
749 meiotic spindle control apparatus.

750

## 751 MATERIALS AND METHODS

### 752 *Drosophila* stocks

753 *P{mata4-GAL-VP16}*, *Nos-Gal4:Vp16* ; *UAS-Clc::GFP*, *Histone::RFP* ; *C(1;Y)*, *y<sup>w</sup>: y<sup>/0</sup>*  
754 and *C(1)RM*, *y<sup>v</sup>/0* stocks were obtained from the Bloomington *Drosophila* Stock Center.  
755 Flies containing the genome rescue transgenes *pCHC3+* (Bazin et al., 1993) and *4C-CHC*  
756 (Kasprovicz et al., 2008), were kindly provided by C. Bazinet and P. Verstreken,  
757 respectively. *d-tacc<sup>1</sup>* and *Df 3R(110)*, covering the *tacc* locus, were provided by J. Raff  
758 (Gergely et al., 2000). *UAS-Chc::eGFP* and *UAS-Chc::mcherry* flies (Li et al., 2010) were  
759 provided by S. Bullock. Transgenic flies *pUASP-Chc-V5-K10-AttB*, and *pUASP-myc-chc-*  
760 *K10-AttB* were described previously (Vazquez-Pianzola et al., 2014). *Df(2L)Exel7068*  
761 (Exelixis) was used as *BicD* deficiency (*BicD*<sup>Df</sup>). The *BicD*<sup>null</sup> allele, *BicD*<sup>r5</sup>, *Bic-D<sup>mom</sup>*, and  
762 *BicD::GFP* were described (Paré and Suter, 2000; Ran et al., 1994; Swan and Suter, 1996;  
763 Vazquez-Pianzola et al., 2014). *White (w)* flies were used as controls.

764 For the production of unfertilized egg, virgin *w* females were crossed to *C(1;Y)<sup>1</sup>, y<sup>1</sup>w:*  
765 *y<sup>+</sup>/0* males to generate XO males that are phenotypically normal but sterile. XO males were  
766 then crossed to virgin females of the desired phenotype. Eggs laid by these females were not  
767 fertilized.

768

### 769 DNA constructs and generation of transgenic flies

770 Generation of the flies expressing the *hb-deGradFP* construct was as follows. The *Nslmb-*  
771 *vhhGFP4* sequence was PCR-amplified with specific primers bearing *BamHI* and *KpnI* sites  
772 using the plasmid pUAS-Nslmb-vhhGFP4 as template (Caussin et al., 2011). Primer  
773 sequences were the following ones. Nano GFP sense-BamHI  
774 (GGATCCATGATGAAAATGGAGACTGACAAAAT)  
775 and Nano GFP anti-Kpn (GGTACCTTAGCTGGAGACGGTGACCTGGGTG). PCR

776 products were subcloned into the same sites of the pCaSper-AttB vector to create the plasmid  
777 pCasper-AttB-Nslmb-vhhGFP4 (or pw+GFP nanobody). A 1.5 Kbp fragment of the *bicoid*  
778 3'-UTR genomic region (Berleth et al., 1988) was amplified from a genomic library using  
779 specific primers containing KpnI and NotI restrictions sites. Primers were: bcd 3'UTR sense-  
780 Kpn I (GGTACCACGCGTAGAAAGTTAGGTCTAGTCC) and bcd 3'UTR anti-Not I  
781 (GCGGCCGCGCTAGTGCTGCCTGTACAGTGTCT). The insert was cloned by T-end  
782 ligation into the pCR2.1 TOPO vector and later subcloned into the KpnI/ NotI sites of  
783 pCasper-AttB-Nslmb-vhhGFP4 to generate the pCasper-AttB-Nslmb-vhhGFP4-bcd 3'-UTR  
784 construct (or pw+ GFP nanobody-bcd 3'-UTR). The minimal maternal *hunchback* (*hb*)  
785 promoter region together with the 5'-UTR leader of the maternal 3.2 Kb *hb* transcript were  
786 amplified using as template the Lac8.0 construct already described (Margolis et al., 1994) and  
787 kindly provided by Jim Posakony. Primers for this amplification contained flanking BglII and  
788 BamHI sites and were the following ones. Hb-pr-sense-BglII  
789 (AGATCTTCCGGATCAGCGGCGCTGATCCTGC), and Hb-pr-Anti-BamHI  
790 (GGATCCCTTGGCGGCTCTAGACGGCTTGCGGACAGTCCAAGTGCAATTC). Inserts  
791 were further cloned into the *BamHI* of Nslmb-vhhGFP4-bcd 3'-UTR to generate Hb-Nslmb-  
792 vhhGFP4-bcd 3'UTR (or pw+ Hb-GFP nanobody-bcd3'UTR). This final plasmid was  
793 injected into embryos containing the ZH-attP-14/3R-86F landing platform to generate flies  
794 expressing the *hb-deGradFP* construct.

795 The *Don Juan (Dj)::mCherry* construct to produce transgenic flies was generated as  
796 follows. mCherry region was PCR-amplified with primers containing BamHI and HindII sites  
797 using pC4-SqhP-mCherry plasmid as template (a gift from Romain Levayer). The reverse  
798 primer added a GS-rich region to use as a linker and the stop codon was removed. The  
799 amplified fragment was further subcloned into the BamHI/HindIII sites of the plasmid  
800 *pw+SNattB* (Koch et al., 2009) to generate the plasmid *pw+attB-mCherry*. The genomic  
801 region containing the minimal promoter, the 5'-UTR and the ORF of *Dj* gene was-PCR  
802 amplified from genomic fly DNA using primers containing EcoRI and BamHI sites, and  
803 cloned into the same sites of *pw+attB-mCherry* to generate the final construct *pw+attB - Don*  
804 *Juan (Dj)::mCherry*. This construct was further injected into flies containing the ZH-attP-52 /  
805 3L-64A landing platform for transgenesis.

806

### 807 **Hatching rate determination and embryo development**

808 Hatching rates were scored as follows. Virgin females of the desired genotype were crossed to  
809 control *white* males. Females were allowed to lay eggs on agar plates for several hours or  
810 overnight. Around 100-200 embryos were marked in the plate and further developed for 48 h  
811 at 25°C. After 48 h, embryos that did not hatch were counted. For scoring embryo

812 development, 2- to 5-h-old embryos were collected. Embryos were then fixed and stained to  
813 detect both  $\alpha$ -tubulin and DNA to score the development stage.

814

#### 815 **Western blots**

816 Preparation of ovaries for Western blots was as follows. Seven pairs of ovaries were collected  
817 in 20  $\mu$ l of SDS-sample buffer, boiled for 2 min., vortexed for 15 sec., boiled for another 8  
818 min. Finally, they were loaded onto an SDS –PAGE. Western blots were performed using  
819 mouse monoclonal anti-BicD antibodies (a mixture of 1B11 and 4C2, 1:10 dilution, (Suter  
820 and Steward, 1991), mouse anti- $\alpha$ -tubulin (1:2,000 dilution of the cell culture’s supernatant,  
821 Developmental Studies Hybridoma Bank (DSHB)), rabbit anti-mammalian Chc (1:500  
822 dilution, (Hirst et al., 2009)), rabbit anti-GFP (1:3,000 dilution, Immunokontakt), rabbit anti-  
823 Clc (1:3,000, (Heerssen et al., 2008)), mouse monoclonal anti-Myc 9E10 (1:5 cell culture  
824 supernatant, DSHB), and rabbit anti D-TACC (1:10,000 dilution, (Kao and Megraw, 2009)).  
825 Primary antibodies were detected using horseradish peroxidase-conjugated secondary  
826 antibodies (GE Healthcare). To detect the hb-deGRadFP construct expression, anti-llama  
827 IgG-heavy and light chain antibody (1:500 dilution, Bethyl) was used, and developed using  
828 anti-goat IgG (H+L)-HRP conjugated antibodies (1:500 dilution, Invitrogen).

829

#### 830 **Immunoprecipitations (IPs)**

831 IPs were done essentially as previously described (Vazquez-Pianzola et al., 2011). 30  $\mu$ l of  
832 protein-G Sepharose beads (Amersham) and 1 ml of embryo extracts were used per IP.  
833 Extracts were prepared from 0-20 h old embryos expressing a Chc::Myc fusion protein under  
834 a maternal Tubulin promoter. As a negative control, extracts were also prepared from wild-  
835 type embryos (OreR). For each IP, 1 ml of cell culture supernatant of monoclonal anti-BicD  
836 1B11, anti-BicD 4C2, or anti-Myc 9E10 antibodies were bound to the beads. To IP TACC, a  
837 solution containing 2  $\mu$ l of the polyclonal anti-TACC UT316 antibody (Kao and Megraw,  
838 2009) diluted in 1 ml of PBS was used to bind to the protein-G beads. Beads were  
839 resuspended in 30  $\mu$ l of sample buffer, and 7 to 15  $\mu$ l per well was analyzed by Western blot.

840

#### 841 **Immunostainings**

842 Immunostainings of embryos were done using the following primary antibodies: mouse anti-  
843 BicD (a mix of 1B11 and 4C2, 1:10 dilution), mouse anti-Myc 9E10 (dilution 1:5, DSHB),  
844 mouse anti-Flag (1:200, Sigma), mouse anti-V5 (1:200, Invitrogen), rabbit anti-Cnn (1:500  
845 (Heuer et al., 1995)), rabbit anti Clc (1:500 (Heerssen et al., 2008)), mouse monoclonal anti-  
846  $\alpha$ -tubulin DM1A (1:500, Sigma), rabbit anti  $\alpha$ -tubulin (1:500, Abcam), rabbit anti-GFP



847 (1:300, previously preabsorbed on embryos, Immunokontakt), rabbit anti D-TACC UT316  
848 (1:1,000 (Kao and Megraw, 2009)), rabbit anti D-TACC (1:500 (Gergely et al., 2000)), rabbit  
849 anti-Msps (1:500 (Cullen et al., 1999)), mouse anti-Flag (1:200, Sigma, F3165) , rabbit anti  
850 CID (1:400 (Buster et al., 2013)), rabbit anti p-Histone H3 (S10) (1:200, Cell Signalling),  
851 mouse anti p-Histone H3 (1:200, Cell Signalling), rabbit anti BubR1 (1:2,000 (Logarinho et  
852 al., 2004)), and rabbit anti Mad2 (1/1,000 (Logarinho et al., 2004)). To detect the hb-  
853 deGRadFP construct, anti-llama IgG-heavy and light chain (1:500 dilution, Bethyl) was  
854 developed anti-goat Alexa Fluor 680 (H+L) (Ivotrogen).

855 Secondary antibodies used were Cy3-conjugated goat anti-mouse, DyLight 647-  
856 conjugated goat anti-mouse or anti-rabbit antibodies (Jackson ImmunoResearch), A488-  
857 conjugated goat anti-rabbit (Molecular Probes), Oregon Green 488 conjugated goat anti-  
858 mouse (Molecular Probes), donkey anti-mouse AF488 (Molecular Probes), AF568 conjugated  
859 donkey anti-mouse, and AF488 conjugated donkey anti-rabbit A488 (Molecular Probes).  
860 Nuclei were visualized by staining DNA with 2.5 µg/ml Hoechst 33258 (Molecular Probes)  
861 for 40 minutes during the final wash or incubated overnight when early meiosis in embryos  
862 was analyzed. Control immunostainings using only secondary antibodies were performed to  
863 detect unspecific binding of the secondary antibodies. For co-localization studies, control  
864 samples using only one of the primary antibodies and both secondary antibodies were  
865 performed to detect bleed through to the other channel. When detecting tagged proteins,  
866 samples of wild-type specimens were used as a control for unspecific binding of the anti-tag  
867 antibody. Embryos were either fixed with 4% paraformaldehyde (PFA) or with methanol, as  
868 indicated. Methanol fixation was mainly used to preserve the cytoskeleton structure and or  
869 reduce the cytoplasmic levels in BicD staining. Methanol fixation was done as previously  
870 described (Kellogg et al., 1988). When antigens were not well preserved in methanol fixations  
871 (for example, this was observed for the Chc fusion proteins), fixation with 4%  
872 paraformaldehyde (PFA) was used. To detect endogenous BicD::GFP in ovaries, ovaries were  
873 fixed with 4% PFA. For preserving the endogenous Clc::GFP signal, embryos were hand-  
874 devitelinized and fixed in a mixture of Heptane saturated with PFA for 15 min. For  
875 preserving the Dj:mcherry and Chc::mCherry signal, the embryos were fixed with MetOH.  
876 Stage 14 oocytes for immunostainings were prepared as previously described (Radford and  
877 McKim, 2016).

878 Images were analyzed with a Leica TCS-SP8 confocal microscope. Most of the  
879 pictures represent z-stack maximal intensity projections along the frames. To detect the  
880 presence of Clc along the tandem meiosis spindles, Z-stack images were processed to correct  
881 for depth and bleaching in Image J. All stacks were processed the same way. First, a crop area  
882 corresponding to the spindle of the same size was cropped in each image. Channels were then  
883 split and subjected to corrections separately. Each channel was smooth with a median filter



884 radius of 1 to decrease the noise. The channel corresponding to the Clc staining had the most  
885 robust signal intensity loss through the sample's depth. This channel was subject to bleach  
886 correction with a simple ratio fit to compensate for intensity attenuation in the image's  
887 deeper stacks. Channels corresponding to  $\alpha$ -tubulin and DNA staining did not lose so much  
888 intensity with the sample's depth. They were subjected to an attenuation correction using an  
889 ImageJ plugin already described (Biot et al., 2008). After intensity correction, the final image  
890 was created by merging the channels previously subjected to maximal intensity Z-stack  
891 projection.

892

### 893 ***In situ* hybridization**

894 For mRNA *in situ* hybridizations, RNA probes were prepared and *in situ* hybridization  
895 experiments were performed as previously described (Vazquez-Pianzola et al., 2017). To  
896 detect deGradFP mRNA, a region of the deGradFP gene was first amplified by PCR with  
897 primers containing T3 and T7 promoter sequences, and the plasmid pUAS-Nslmb-vhhGFP4  
898 as a template (Caussinus et al., 2011). Primer sequences were the following ones. The sense  
899 primer containing the T3 promoter was:

900 GGGGGGAATTAACCCTCACTAAAGGGAGAATGGATCAAGTCCAACCTGGTGGAGT

901 and the antisense primer containing the T7 promoter was:

902 GGGGGGTAATACGACTCACTATAGGGAGATTAGCTGGAGACGGTGACCTGGGTG.

903 Antisense and sense probes were generated using T7 and T3 RNA polymerase, respectively.

904 A sense probe was used to detect unspecific background.

905 DNA *in situ* to *Drosophila* chromosomes was done mainly according to (Dernburg, 2000).

906 DNA oligos hybridizing to repetitive regions of the Y (AATAC)<sub>6</sub> and the 2<sup>nd</sup> chromosome  
907 (AACAC)<sub>7</sub> were ordered modified with Cy3 and Cy5 fluorophores at their 5' end,  
908 respectively, from Microsynth. The sequences were already described (Dernburg, 2000). The

909 sequence used to detect the X chromosome by hybridizing to TTT- TCC-AAA-TTT-CGG-

910 TCA-TCA-AAT-AAT-CAT recognizes the 359-bp satellite block on the *D. melanogaster* X

911 chromosome as well as minor variants on Chromosome 3 was described by (Ferree and  
912 Barbash, 2009). A 5' end Cy5 fluorophore-labeled probe was used. Embryos were fixed with

913 methanol for DNA *in situ* hybridizations. Probes were used at a final concentration of 5 ng/ $\mu$ l

914 in hybridization buffer. The blocking buffer used (before adding the first antibody for

915 detection of the desired proteins) was: 2x SSC, 0.5% BSA (molecular grade BSA from

916 Biolabs or Acetylated BSA from Ambion), and Tween-20 at 0.1%. Donkey fluorescent-

917 conjugated secondary antibodies were used as described in the immunofluorescence

918 experiments.

919

920 **RNAi in S2 cells**

921 DNA fragments of BicD, Chc, and Clc, corresponding to the amplicons DRSC02006,  
922 DRSC20229, and DRSC42517 (<https://www.flyrnai.org>), were PCR amplified with sense and  
923 antisense primers containing T7 promoter sequences. LD43101 and GM02293 (BDGP  
924 resources) constructs containing *chc* and *Clc* cDNAs, respectively, and pBS-Bic-D plasmids  
925 were used as templates for the PCR. RNA was synthesized using 2 µg of PCR DNA template  
926 with the RNAMaxx™ high Yield transcription kit (Stratagene) following the manufacturer's  
927 instructions. Transcription reactions were further subjected to DNase treatment and  
928 purification using the RNeasy Kit (Quiagen). 1x10<sup>6</sup> S2 cells resuspended in 1ml of  
929 *Drosophila* Schneider's serum free medium containing 2 mM Glutamine were seeded into  
930 each well of a 6-well plate. 15 µg of the corresponding dsRNA was added to each well and  
931 incubated for 1 hour at RT. After that, 3 ml of Schneider medium containing 10% FCS and  
932 50 µg ml<sup>-1</sup> penicillin/streptomycin (complete medium) was added to each well. After one day,  
933 cells were resuspended and 1 ml of the resuspended cells was seeded into each well of a fresh  
934 6-well plate. Finally, 0.5 ml of complete medium was added to each plate. 3-4 days after  
935 adding of dsRNA, cells were subjected to western blot or immunostaining. For  
936 immunostainings, the cells were resuspended and seeded on concavalin A-treated slides. Cells  
937 were allowed to settle shortly, then fixed with cold Methanol and subjected to  
938 immunostaining with the corresponding antibodies. For Western blots, the cells were washed  
939 once with cold 1x PBS, pelleted and resuspended in Hypotonic Buffer (10mM Hepes Ph 7.4,  
940 10mM KAc, 1.5 mM MgAc, 2.5 mM DTT, 1% NP-40 plus protease inhibitors). Cells were  
941 incubated on ice for 15 min, vortexed for 10 seconds and centrifuge at 10.000 xg for 5  
942 minutes at 4°C. 1 to 3 µl of the supernatant was used to measure protein concentration using  
943 the Bio-Rad Protein assay solution. 5 µg of protein extract was loaded per well.

944

945 **Yeast two hybrid experiments**

946 Two hybrid plasmids containing the *Drosophila Egl* (Egl; CG4051) full-length (pEgl-AD and  
947 pEgl-BD), *BicD* full-length (pBicD-AD and pBicD-BD) and the *BicD* carboxy-terminal  
948 domain (CTD; amino acids 535–782) (pBicD(535–782)-BD and pBicD (535–782)-AD) were  
949 previously described (Rashpa et al., 2017). *D-TACC* (CG9765) full-length; and *Chc*  
950 (CG9012) full-length, a fragment containing amino acids 329-803, and another one bearing  
951 amino acids 329–542 were cloned into the pOAD and or pOBD2 vectors (Cagney et al.,  
952 2000) in-frame either with the activator domain (AD) or the DNA-binding domain (BD)  
953 sequence of GAL4, respectively, to create the “prey” plasmids, pD-TACC-AD, pChc-AD,  
954 pChc (329–803)-AD, and pChc(329–542)-AD, as well as the “bait” plasmids pChc-BD, pChc  
955 (329–803)-BD and pChc (329–542)-BD. To produce the constructs D-TACC-Ala and D-

956 TACC-Asp, D-TACC Ser863 was mutated to an alanine and aspartic acid codon,  
957 respectively, by site directed mutagenesis. Changes were verified by sequencing. Interactions  
958 between “bait” and “prey” proteins were detected following a yeast interaction-mating  
959 method using the strains PJ69-4a and PJ69-4alpha (Cagney et al., 2000). Diploid cells  
960 containing both bait and prey plasmids were grown in selective media –(Trp, Leu), spotted as  
961 serial dilutions on the auxotrophic medium –(Leu, Trp) and shown as growth control. Protein  
962 interactions were detected in serial dilutions by growing the diploid cells on the auxotrophic  
963 media –(Leu, Trp, adenine) or –(Leu, Trp, His) supplemented with the indicated amounts of  
964 3-amino-1,2,4-triazole (3AT). Growth was scored after 4-5 days of growth at 30°C.

965

### 966 ***C. elegans* strains, RNAi and imaging**

967 N2, JDU233 (*H2B::mCherry*; *α-tubulin::GFP*), VJ512, *chc-1(tm2866)III/hT2[bli-4(e937) let-*  
968 *?(q782) qIs48](I;III)*. Feeding of RNAi was performed on NGM plates containing 1mM  
969 IPTG and carbenicillin using clones from the Ahringer RNAi library (Kamath et al., Nature  
970 2003). For non-lethal phenotypes, the progeny was imaged after 60 hours of feeding of gravid  
971 adults at 20°C. For lethal phenotypes, L3/L4 larvae were transferred onto RNAi plates and  
972 incubated for 12 h at room temperature to obtain gravid adults. The empty vector L4440 was  
973 used as a control. Embryo dissections were performed as previously described (Bellanger et  
974 al., 2007), and embryos were imaged immediately on an agar pad using an AxioVision (Zeiss)  
975 microscope with an 100x NA 1.4 oil objective with a GFP and an mCherry filter set. One  
976 plane was acquired every 10 seconds using Visiview, and images were processed using  
977 ImageJ and Photoshop.

978 .

### 979 **ACKNOWLEDGEMENTS**

980 We thank S.L Bullock, C. Bazinet, J. Hirst, J. Raff, T.L. Melgraw, H. Ohkura, G.C. Rogers,  
981 C.E. Sunkel, Markus Affolter, Emmanuel Caussinus, the Bloomington *Drosophila* Stock  
982 Center and the Developmental Studies Hybridoma Bank for antibodies, constructs and fly  
983 stocks. We thank FlyBase for the *Drosophila* genomic resources. We thank Andrew Swan for  
984 scientific advice on how to study female meiosis. This work was supported by the Swiss  
985 National Science Foundation and the Canton of Bern to B.S and an Equal Opportunity grant  
986 from the Phil.-Nat. faculty to P.V.P.

987

988 **Competing interests.** The authors declare no competing financial interests.

989

990 **Author contributions.** P.V.P., D. B., G.S., G. H., G. M. and D. H performed experiments.

991 P.V.P., G. S., P.M. and G.H. analyzed data. P.V. P. and B.S. conceived the studies. G.S. and

992 P. M. contributed on writing the results of the *C. elegans* experiments. P.V.P and B.S. wrote  
993 the manuscript.

994

## 995 REFERENCES

996 **Barros, T. P., Kinoshita, K., Hyman, A. A. and Raff, J. W.** (2005). Aurora A activates D-  
997 TACC-Msps complexes exclusively at centrosomes to stabilize centrosomal  
998 microtubules. *J Cell Biol* **170**, 1039–1046.

999 **Basto, R., Scaerou, F., Mische, S., Wojcik, E., Lefebvre, C., Gomes, R., Hays, T. and**  
1000 **Karess, R.** (2004). In vivo dynamics of the rough deal checkpoint protein during  
1001 *Drosophila* mitosis. *Curr. Biol.* **14**, 56–61.

1002 **Bazinet, C., Katzen, A. L., Morgan, M., Mahowald, A. P. and Lemmon, S. K.** (1993). The  
1003 *Drosophila* clathrin heavy chain gene: clathrin function is essential in a multicellular  
1004 organism. *Genetics* **134**, 1119–1134.

1005 **Bellanger, J.-M., Carter, J. C., Phillips, J. B., Canard, C., Bowerman, B. and Gönczy, P.**  
1006 (2007). ZYG-9, TAC-1 and ZYG-8 together ensure correct microtubule function  
1007 throughout the cell cycle of *C. elegans* embryos. *Journal of Cell Science* **120**, 2963–  
1008 2973.

1009 **Berleth, T., Burri, M., Thoma, G., Bopp, D., Richstein, S., Frigerio, G., Noll, M. and**  
1010 **Nüsslein-Volhard, C.** (1988). The role of localization of *bicoid* RNA in organizing the  
1011 anterior pattern of the *Drosophila* embryo. *EMBO J.* **7**, 1749–1756.

1012 **Biot E, Crowell E, Höfte H, Maurin Y, Vernhettes S & Andrey P.** (2008). A new filter for  
1013 spot extraction in *N*-dimensional biological imaging. In *Fifth IEEE International*  
1014 *Symposium on Biomedical Imaging (ISBI'08): From Nano to Macro*, pp. 975-978.

1015

1016 **Booth, D. G., Hood, F. E., Prior, I. A. and Royle, S. J.** (2011). A TACC3/ch-TOG/clathrin  
1017 complex stabilises kinetochore fibres by inter-microtubule bridging. *EMBO J.* **30**, 906–  
1018 919.

1019

1020 **Brodsky, F. M.** (2012). Diversity of clathrin function: new tricks for an old protein. *Annu.*  
1021 *Rev. Cell Dev. Biol.* **28**, 309–336.

1022 **Bullock, S. L. and Ish-Horowicz, D.** (2001). Conserved signals and machinery for RNA  
1023 transport in *Drosophila* oogenesis and embryogenesis. *Nature* **414**, 611–616.

1024 **Buster, D. W., Daniel, S. G., Nguyen, H. Q., Windler, S. L., Skwarek, L. C., Peterson,**  
1025 **M., Roberts, M., Meserve, J. H., Hartl, T., Klebba, J. E., et al.** (2013). SCFSlimb  
1026 ubiquitin ligase suppresses condensin II-mediated nuclear reorganization by degrading  
1027 Cap-H2. *J Cell Biol* **201**, 49–63.

1028 **Cagney, G., Uetz, P. and Fields, S.** (2000). High-throughput screening for protein-protein  
1029 interactions using two-hybrid assay. *Meth. Enzymol.* **328**, 3–14.

1030 **Caussin, E., Kanca, O. and Affolter, M.** (2011). Fluorescent fusion protein knockout  
1031 mediated by anti-GFP nanobody. *Nature Publishing Group* **19**, 117–121.

1032 **Conde, C., Osswald, M., Barbosa, J., Moutinho-Santos, T., Pinheiro, D., Guimarães, S.,**  
1033 **Matos, I., Maiato, H. and Sunkel, C. E.** (2013). *Drosophila* Polo regulates the spindle

- 1034 assembly checkpoint through Mps1-dependent BubR1 phosphorylation. *EMBO J.* **32**,  
1035 1761–1777.
- 1036 **Cullen, C. F. and Ohkura, H.** (2001). Mps1 protein is localized to acentrosomal poles to  
1037 ensure bipolarity of *Drosophila* meiotic spindles. *Nat. Cell Biol.* **3**, 637–642.
- 1038 **Cullen, C. F., Deák, P., Glover, D. M. and Ohkura, H.** (1999). *mini spindles*: A gene  
1039 encoding a conserved microtubule-associated protein required for the integrity of the  
1040 mitotic spindle in *Drosophila*. *J Cell Biol* **146**, 1005–1018.
- 1041 **De Renzis, S., Elemento, O., Tavazoie, S. and Wieschaus, E. F.** (2007). Unmasking  
1042 activation of the zygotic genome using chromosomal deletions in the *Drosophila*  
1043 embryo. *PLoS Biol.* **5**, e117.
- 1044 **Défachelles, L., Hainline, S. G., Menant, A., Lee, L. A. and Karess, R. E.** (2015). A  
1045 maternal effect *rough deal* mutation suggests that multiple pathways regulate *Drosophila*  
1046 RZZ kinetochore recruitment. *Journal of Cell Science* **128**, 1204–1216.
- 1047 **Dernburg A. F.** (2000) *In Situ* hybridization to somatic chromosomes. In: *Drosophila*  
1048 *Protocols* (ed. W. Sullivan, M. Ashburner and R. S. Hawley), pp. 24–55. Cold Spring  
1049 Harbor, New York, USA: Cold Spring Harbor Laboratory Press.
- 1050
- 1051 **Dienstbier, M., Boehl, F., Li, X. and Bullock, S. L.** (2009). Egalitarian is a selective RNA-  
1052 binding protein linking mRNA localization signals to the dynein motor. *Genes Dev.* **23**,  
1053 1546–1558.
- 1054
- 1055 **Driever, W. and Nüsslein-Volhard, C.** (1988). A gradient of bicoid protein in *Drosophila*  
1056 embryos. *Cell* **54**, 83–93.
- 1057 **Edgar, B. A. and Schubiger, G.** (1986). Parameters controlling transcriptional activation  
1058 during early *Drosophila* development. *Cell* **44**, 871–877.
- 1059 **Espeut, J., Lara-Gonzalez, P., Sassine, M., Shiau, A. K., Desai, A. and Abrieu, A.** (2015).  
1060 Natural Loss of Mps1 Kinase in Nematodes Uncovers a Role for Polo-like Kinase 1 in  
1061 Spindle Checkpoint Initiation. *Cell Rep* **12**, 58–65.
- 1062 **Ferree, P. M. and Barbash, D. A.** (2009). Species-specific heterochromatin prevents mitotic  
1063 chromosome segregation to cause hybrid lethality in *Drosophila*. *PLoS Biol.* **7**,  
1064 e1000234.
- 1065 **Fischer, M. G., Heeger, S., Häcker, U. and Lehner, C. F.** (2004). The mitotic arrest in  
1066 response to hypoxia and of polar bodies during early embryogenesis requires *Drosophila*  
1067 *Mps1*. *Curr. Biol.* **14**, 2019–2024.
- 1068 **Foraker, A. B., Camus, S. M., Evans, T. M., Majeed, S. R., Chen, C.-Y., Taner, S. B.,**  
1069 **Corrêa, I. R., Doxsey, S. J. and Brodsky, F. M.** (2012). Clathrin promotes centrosome  
1070 integrity in early mitosis through stabilization of centrosomal ch-TOG. *J Cell Biol* **198**,  
1071 591–605.
- 1072 **Fu, W., Tao, W., Zheng, P., Fu, J., Bian, M., Jiang, Q., Clarke, P. R. and Zhang, C.**  
1073 (2010). Clathrin recruits phosphorylated TACC3 to spindle poles for bipolar spindle  
1074 assembly and chromosome alignment. *Journal of Cell Science* **123**, 3645–3651.
- 1075 **Fumoto, K., Hoogenraad, C. C. and Kikuchi, A.** (2006). GSK-3beta-regulated interaction  
1076 of BICD with dynein is involved in microtubule anchorage at centrosome. *EMBO J.* **25**,



- 1077 5670–5682.
- 1078 **Gergely, F., Kidd, D., Jeffers, K., Wakefield, J. G. and Raff, J. W.** (2000). D-TACC: a  
1079 novel centrosomal protein required for normal spindle function in the early *Drosophila*  
1080 embryo. *EMBO J.* **19**, 241–252.
- 1081 **Gönczy, P., Pichler, S., Kirkham, M. and Hyman, A. A.** (1999). Cytoplasmic dynein is  
1082 required for distinct aspects of MTOC positioning, including centrosome separation, in  
1083 the one cell stage *Caenorhabditis elegans* embryo. *J Cell Biol* **147**, 135–150.
- 1084 **Gutiérrez-Caballero, C., Burgess, S. G., Bayliss, R. and Royle, S. J.** (2015). TACC3-ch-  
1085 TOG track the growing tips of microtubules independently of clathrin and Aurora-A  
1086 phosphorylation. *Biol Open* **4**, 170–179.
- 1087 **Heerssen, H., Fetter, R. D. and Davis, G. W.** (2008). Clathrin dependence of synaptic-  
1088 vesicle formation at the *Drosophila* neuromuscular junction. *Curr. Biol.* **18**, 401–409.
- 1089 **Heuer, J. G., Li, K. and Kaufman, T. C.** (1995). The *Drosophila* homeotic target gene  
1090 *centrosomin (cnn)* encodes a novel centrosomal protein with leucine zippers and maps to  
1091 a genomic region required for midgut morphogenesis. *Development* **121**, 3861–3876.
- 1092 **Hirst, J., Sahlender, D. A., Choma, M., Sinka, R., Harbour, M. E., Parkinson, M. and**  
1093 **Robinson, M. S.** (2009). Spatial and functional relationship of GGAs and AP-1 in  
1094 *Drosophila* and HeLa cells. *Traffic* **10**, 1696–1710.
- 1095 **Hoogenraad, C. C. and Akhmanova, A.** (2016). Bicaudal D Family of Motor Adaptors:  
1096 Linking Dynein Motility to Cargo Binding. *Trends Cell Biol.* **26**, 327–340.
- 1097 **Howell, B. J., McEwen, B. F., Canman, J. C., Hoffman, D. B., Farrar, E. M., Rieder, C.**  
1098 **L. and Salmon, E. D.** (2001). Cytoplasmic dynein/dynactin drives kinetochore protein  
1099 transport to the spindle poles and has a role in mitotic spindle checkpoint inactivation. *J*  
1100 *Cell Biol* **155**, 1159–1172.
- 1101 **Ikeda, M. and Tanaka, K.** (2017). Plk1 bound to Bub1 contributes to spindle assembly  
1102 checkpoint activity during mitosis. *Sci Rep* **7**, 8794–15.
- 1103 **Jackson, J. R., Patrick, D. R., Dar, M. M. and Huang, P. S.** (2007). Targeted anti-mitotic  
1104 therapies: can we improve on tubulin agents? *Nat. Rev. Cancer* **7**, 107–117.
- 1105 **Kamath, R. S. and Ahringer, J.** (2003). Genome-wide RNAi screening in *Caenorhabditis*  
1106 *elegans*. *Methods* **30**, 313–321.
- 1107 **Kao, L.-R. and Megraw, T. L.** (2009). Centrocortin Cooperates with Centrosomin to  
1108 Organize *Drosophila* Embryonic Cleavage Furrows. *Curr. Biol.* **19**, 937–942.
- 1109 **Kasprowicz, J., Kuenen, S., Miskiewicz, K., Habets, R. L. P., Smits, L. and Verstreken,**  
1110 **P.** (2008). Inactivation of clathrin heavy chain inhibits synaptic recycling but allows bulk  
1111 membrane uptake. *J Cell Biol* **182**, 1007–1016.
- 1112 **Kellogg, D. R., Mitchison, T. J. and Alberts, B. M.** (1988). Behaviour of microtubules and  
1113 actin filaments in living *Drosophila* embryos. *Development* **103**, 675–686.
- 1114 **Kleist, von, L., Stahlschmidt, W., Bulut, H., Gromova, K., Puchkov, D., Robertson, M.**  
1115 **J., MacGregor, K. A., Tomilin, N., Tomlin, N., Pechstein, A., et al.** (2011). Role of the  
1116 clathrin terminal domain in regulating coated pit dynamics revealed by small molecule

- 1117 inhibition. *Cell* **146**, 471–484.
- 1118 **Koch, R., Ledermann, R., Urwyler, O., Heller, M. and Suter, B.** (2009). Systematic  
1119 functional analysis of Bicaudal-D serine phosphorylation and intragenic suppression of a  
1120 female sterile allele of *BicD*. *PLoS ONE* **4**, e4552.
- 1121 **Laband, K., Lacroix, B., Edwards, F., Canman, J. C. and Dumont, J.** (2018). Live  
1122 imaging of *C. elegans* oocytes and early embryos. *Methods Cell Biol.* **145**, 217–236.
- 1123 **Lee, M. J., Gergely, F., Jeffers, K., Peak-Chew, S. Y. and Raff, J. W.** (2001).  
1124 Msps/XMAP215 interacts with the centrosomal protein D-TACC to regulate microtubule  
1125 behaviour. *Nat. Cell Biol.* **3**, 643–649.
- 1126 **Levine, M. S. and Holland, A. J.** (2018). The impact of mitotic errors on cell proliferation  
1127 and tumorigenesis. *Genes Dev.* **32**, 620–638.
- 1128 **Li, X., Kuromi, H., Briggs, L., Green, D. B., Rocha, J. A. O. J., Sweeney, S. T. and**  
1129 **Bullock, S. L.** (2010). Bicaudal-D binds clathrin heavy chain to promote its transport and  
1130 augments synaptic vesicle recycling. *EMBO J.* **29**, 992–1006.
- 1131 **Lin, C.-H., Hu, C.-K. and Shih, H.-M.** (2010). Clathrin heavy chain mediates TACC3  
1132 targeting to mitotic spindles to ensure spindle stability. *J Cell Biol* **189**, 1097–1105.
- 1133 **Logarinho, E., Bousbaa, H., Dias, J. M., Lopes, C., Amorim, I., Antunes-Martins, A. and**  
1134 **Sunkel, C. E.** (2004). Different spindle checkpoint proteins monitor microtubule  
1135 attachment and tension at kinetochores in *Drosophila* cells. *Journal of Cell Science* **117**,  
1136 1757–1771.
- 1137 **Lu, A., Zhou, C.-J., Wang, D.-H., Han, Z., Kong, X.-W., Ma, Y.-Z., Yun, Z.-Z. and**  
1138 **Liang, C.-G.** (2017). Cytoskeleton-associated protein 5 and clathrin heavy chain binding  
1139 regulates spindle assembly in mouse oocytes. *Oncotarget* **8**, 17491–17503.
- 1140 **Lucaj, C. M., Evans, M. F., Nwagbara, B. U., Ebbert, P. T., Baker, C. C., Volk, J. G.,**  
1141 **Francl, A. F., Ruvolo, S. P. and Lowery, L. A.** (2015). *Xenopus* TACC1 is a  
1142 microtubule plus-end tracking protein that can regulate microtubule dynamics during  
1143 embryonic development. *Cytoskeleton (Hoboken)* **72**, 225–234.
- 1144 **Mach, J. M. and Lehmann, R.** (1997). An Egalitarian-BicaudalD complex is essential for  
1145 oocyte specification and axis determination in *Drosophila*. *Genes Dev.* **11**, 423–435.
- 1146 **Margolis, J. S., Borowsky, M., Shim, C. W. and Posakony, J. W.** (1994). A small region  
1147 surrounding the distal promoter of the *hunchback* gene directs maternal expression. *Dev.*  
1148 *Biol.* **163**, 381–388.
- 1149 **Maro, B., Johnson, M. H., Pickering, S. J. and Louvard, D.** (1985). Changes in the  
1150 distribution of membranous organelles during mouse early development. *J Embryol Exp*  
1151 *Morphol* **90**, 287–309.
- 1152 **Marston, A. L. and Wassmann, K.** (2017). Multiple Duties for Spindle Assembly  
1153 Checkpoint Kinases in Meiosis. *Front Cell Dev Biol* **5**, 109.
- 1154 **Mirouse, V., Formstecher, E. and Couderc, J. L.** (2006). Interaction between Polo and  
1155 BicD proteins links oocyte determination and meiosis control in *Drosophila*.  
1156 *Development* **133**, 4005–4013.



- 1157 **Nag, R. N., Niggli, S., Sousa-Guimarães, S., Vazquez-Pianzola, P. and Suter, B.** (2018).  
1158 *Mms19* is a mitotic gene that permits Cdk7 to be fully active as a Cdk-activating kinase.  
1159 *Development* **145**, dev156802.
- 1160 **Nwagbara, B. U., Faris, A. E., Bearce, E. A., Erdogan, B., Ebbert, P. T., Evans, M. F.,**  
1161 **Rutherford, E. L., Enzenbacher, T. B. and Lowery, L. A.** (2014). TACC3 is a  
1162 microtubule plus end-tracking protein that promotes axon elongation and also regulates  
1163 microtubule plus end dynamics in multiple embryonic cell types. *Mol. Biol. Cell* **25**,  
1164 3350–3362.
- 1165 **Paré, C. and Suter, B.** (2000). Subcellular localization of Bic-D::GFP is linked to an  
1166 asymmetric oocyte nucleus. *Journal of Cell Science* **113 ( Pt 12)**, 2119–2127.
- 1167 **Payne, C., Rawe, V., Ramalho-Santos, J., Simerly, C. and Schatten, G.** (2003).  
1168 Preferentially localized dynein and perinuclear dynactin associate with nuclear pore  
1169 complex proteins to mediate genomic union during mammalian fertilization. *Journal of*  
1170 *Cell Science* **116**, 4727–4738.
- 1171 **Pérez-Mongiovi, D., Malmanche, N., Bousbaa, H. and Sunkel, C.** (2005). Maternal  
1172 expression of the checkpoint protein BubR1 is required for synchrony of syncytial  
1173 nuclear divisions and polar body arrest in *Drosophila melanogaster*. *Development* **132**,  
1174 4509–4520.
- 1175 **Radford, S. J. and McKim, K. S.** (2016). Techniques for Imaging Prometaphase and  
1176 Metaphase of Meiosis I in Fixed *Drosophila* Oocytes. *J Vis Exp* e54666.
- 1177 **Ran, B., Bopp, R. and Suter, B.** (1994). Null alleles reveal novel requirements for *Bic-D*  
1178 during *Drosophila* oogenesis and zygotic development. *Development* **120**, 1233–1242.
- 1179 **Rashpa, R., Vazquez-Pianzola, P., Colombo, M., Hernandez, G., Beuchle, D., Berger, F.,**  
1180 **Peischl, S., Bruggmann, R. and Suter, B.** (2017). *Cbp80* is needed for the expression of  
1181 piRNA components and piRNAs. *PLoS ONE* **12**, e0181743.
- 1182 **Rieder, C. L. and Maiato, H.** (2004). Stuck in division or passing through: what happens  
1183 when cells cannot satisfy the spindle assembly checkpoint. *Dev. Cell* **7**, 637–651.
- 1184 **Riparbelli, M. G. and Callaini, G.** (2005). The meiotic spindle of the *Drosophila* oocyte: the  
1185 role of centrosomin and the central aster. *Journal of Cell Science* **118**, 2827–2836.
- 1186 **Riparbelli, M. G., Callaini, G. and Glover, D. M.** (2000). Failure of pronuclear migration  
1187 and repeated divisions of polar body nuclei associated with MTOC defects in *polo* eggs  
1188 of *Drosophila*. *Journal of Cell Science* **113 ( Pt 18)**, 3341–3350.
- 1189 **Royle, S. J.** (2012). The role of clathrin in mitotic spindle organisation. *Journal of Cell*  
1190 *Science* **125**, 19–28.
- 1191 **Royle, S. J. and Lagnado, L.** (2006). Trimerisation is important for the function of clathrin  
1192 at the mitotic spindle. *Journal of Cell Science* **119**, 4071–4078.
- 1193 **Royle, S. J., Bright, N. A. and Lagnado, L.** (2005). Clathrin is required for the function of  
1194 the mitotic spindle. *Nature* **434**, 1152–1157.
- 1195 **Rutherford, E. L., Carandang, L., Ebbert, P. T., Mills, A. N., Bowers, J. T. and Lowery,**  
1196 **L. A.** (2016). *Xenopus* TACC2 is a microtubule plus end-tracking protein that can  
1197 promote microtubule polymerization during embryonic development. *Mol. Biol. Cell* **27**,

- 1198 3013–3020.
- 1199 **Sallés, F. J., Lieberfarb, M. E., Wreden, C., Gergen, J. P. and Strickland, S.** (1994).  
1200 Coordinate initiation of *Drosophila* development by regulated polyadenylation of  
1201 maternal messenger RNAs. *Science* **266**, 1996–1999.
- 1202 **Santel, A., Winhauer, T., Blümer, N. and Renkawitz-Pohl, R.** (1997). The *Drosophila don*  
1203 *juan (dj)* gene encodes a novel sperm specific protein component characterized by an  
1204 unusual domain of a repetitive amino acid motif. *Mech. Dev.* **64**, 19–30.
- 1205 **Sawicka, A. and Seiser, C.** (2012). Histone H3 phosphorylation - a versatile chromatin  
1206 modification for different occasions. *Biochimie* **94**, 2193–2201.
- 1207 **Schubert, von, C., Cubizolles, F., Bracher, J. M., Sliedrecht, T., Kops, G. J. P. L. and**  
1208 **Nigg, E. A.** (2015). Plk1 and Mps1 Cooperatively Regulate the Spindle Assembly  
1209 Checkpoint in Human Cells. *Cell Rep* **12**, 66–78.
- 1210 **Schulz, C. and Tautz, D.** (1995). Zygotic *caudal* regulation by *hunchback* and its role in  
1211 abdominal segment formation of the *Drosophila* embryo. *Development* **121**, 1023–1028.
- 1212 **Smith, C. M., Haucke, V., McCluskey, A., Robinson, P. J. and Chircop, M.** (2013).  
1213 Inhibition of clathrin by pitstop 2 activates the spindle assembly checkpoint and induces  
1214 cell death in dividing HeLa cancer cells. *Mol. Cancer* **12**, 4–15.
- 1215 **So, C., Seres, K. B., Steyer, A. M., Mönnich, E., Clift, D., Pejkovska, A., Möbius, W. and**  
1216 **Schuh, M.** (2019). A liquid-like spindle domain promotes acentrosomal spindle  
1217 assembly in mammalian oocytes. *Science* **364**, eaat9557.
- 1218 **Sokac, A. M. and Wieschaus, E.** (2008). Local actin-dependent endocytosis is zygotically  
1219 controlled to initiate *Drosophila* cellularization. *Dev. Cell* **14**, 775–786.
- 1220 **Suter, B. and Steward, R.** (1991). Requirement for phosphorylation and localization of the  
1221 Bicaudal-D protein in *Drosophila* oocyte differentiation. *Cell* **67**, 917–926.
- 1222 **Suter, B., Romberg, L. M. and Steward, R.** (1989). *Bicaudal-D*, a *Drosophila* gene  
1223 involved in developmental asymmetry: localized transcript accumulation in ovaries and  
1224 sequence similarity to myosin heavy chain tail domains. *Genes Dev.* **3**, 1957–1968.
- 1225 **Swan, A. and Suter, B.** (1996). Role of *Bicaudal-D* in patterning the *Drosophila* egg  
1226 chamber in mid-oogenesis. *Development* **122**, 3577–3586.
- 1227 **Tahara, H., Yokota, E., Igarashi, H., Orii, H., Yao, M., Sonobe, S., Hashimoto, T.,**  
1228 **Hussey, P. J. and Shimmen, T.** (2007). Clathrin is involved in organization of mitotic  
1229 spindle and phragmoplast as well as in endocytosis in tobacco cell cultures. *Protoplasma*  
1230 **230**, 1–11.
- 1231 **Vazquez-Pianzola, P. and Suter, B.** (2012). Conservation of the RNA Transport  
1232 Machineries and Their Coupling to Translation Control across Eukaryotes. *Comp. Funct.*  
1233 *Genomics* **2012**, 287852–13.
- 1234 **Vazquez-Pianzola P., Suter B., Hernández G.** (2016) Evolution of the Molecules Coupling  
1235 mRNA Transport with Translational Control in Metazoans. In: Evolution of the Protein  
1236 Synthesis Machinery and Its Regulation (ed. G.Hernández R. Jagus), pp. 531-546. New  
1237 York, USA: Springer, Cham.  
1238

- 1239 **Vazquez-Pianzola, P., Adam, J., Haldemann, D., Hain, D., Urlaub, H. and Suter, B.**  
1240 (2014). Clathrin heavy chain plays multiple roles in polarizing the *Drosophila* oocyte  
1241 downstream of *Bic-D*. *Development* **141**, 1915–1926.
- 1242 **Vazquez-Pianzola, P., Schaller, B., Colombo, M., Beuchle, D., Neuenschwander, S.,**  
1243 **Marcil, A., Bruggmann, R. and Suter, B.** (2017). The mRNA transportome of the  
1244 BicD/Egl transport machinery. *RNA Biol* **14**, 73–89.
- 1245 **Vazquez-Pianzola, P., Urlaub, H. and Suter, B.** (2011). Pabp binds to the *osk* 3'UTR and  
1246 specifically contributes to *osk* mRNA stability and oocyte accumulation. *Dev. Biol.* **357**,  
1247 404–418.
- 1248 **Wharton, R. P. and Struhl, G.** (1989). Structure of the *Drosophila* BicaudalD protein and  
1249 its role in localizing the posterior determinant *nanos*. *Cell* **59**, 881–892.
- 1250 **Wojcik, E., Basto, R., Serr, M., Scaërou, F., Karess, R. and Hays, T.** (2001). Kinetochore  
1251 dynein: its dynamics and role in the transport of the Rough deal checkpoint protein. *Nat.*  
1252 *Cell Biol.* **3**, 1001–1007.
- 1253 **Yamauchi, T., Ishida, T., Nomura, T., Shinagawa, T., Tanaka, Y., Yonemura, S. and**  
1254 **Ishii, S.** (2008). A B-Myb complex containing clathrin and filamin is required for mitotic  
1255 spindle function. *EMBO J.* **27**, 1852–1862.
- 1256

1257

## 1258 **FIGURE LEGENDS**

1259 **Figure 1. Dynamic localization of BicD and Chc during the embryonic cell cycle with**  
1260 **enrichment at the mitotic spindles and centrosomes. (A)** Methanol fixed wild-type  
1261 embryos were stained for BicD (red) and Cnn (green). BicD colocalized with the  
1262 pericentrosomal (PCM) Cnn throughout the cell cycle. BicD it also present at the mitotic  
1263 spindles where it is clearly detected in metaphase. Scale bars represent 5  $\mu\text{m}$  **(B)** BicD::GFP  
1264 expressing embryos were stained using anti-GFP (green) and anti- $\alpha$ -tubulin (red) antibodies.  
1265 The BicD::GFP fusion protein was also detected at centrosomes and spindles. Scale bars  
1266 represent 5  $\mu\text{m}$ . **(C)** Embryos expressing a V5-tagged version of Chc were stained with anti-  
1267 V5 (red) and anti-Cnn (green) antibodies. During interphase and prophase (right panels), the  
1268 Chc::V5 fusion protein localized near the membranes that have started to invaginate and also  
1269 to the centrosomes as seen by its co-localization with Cnn. In metaphase (left panels),  
1270 Chc::V5 can be clearly detected at the mitotic spindle and the centrosomes. **(D)** Embryos  
1271 expressing a Chc::mCherry were subject to live imaging to detect the dynamic movement of  
1272 Chc during the cell cycle. Scale bar represent 10  $\mu\text{m}$ . Embryos in A-C were also stained with  
1273 Hoechst (blue) to visualize the DNA.

1274

1275

1276 **Figure 2. *hb-deGradFP* degrades BicD::GFP specifically during embryogenesis causing**  
1277 **early embryonic developmental arrest. (A)** Scheme depicting the construct expressed in  
1278 flies (not drawn to scale). **(B)** RNA *in situ* hybridization to detect the expression and  
1279 localization of the mRNA expressed from the *deGradFP* construct. A digoxigenin-labeled  
1280 probe complementary to the *VhhGFP4* region of the *deGradFP* construct was used. Due to  
1281 the presence of the *bcd* 3' UTR, the mRNA is enriched in the anterior region of the embryos  
1282 from early embryogenesis on. **(C)** Expression of the lambda anti-GFP nanobody expressed  
1283 from the *deGradFP* construct was detected by immunofluorescence using anti-lambda IgG  
1284 antibodies. The *deGradFP* construct was weakly and ubiquitously expressed in embryos from  
1285 mothers with the *deGradFP* transgene, but not in control embryos. DNA (blue) was stained  
1286 with Hoechst. Wild-type embryos were used as negative control in B and C. **(D)** Percentage  
1287 of embryos that hatched as larvae. Eggs were laid by mothers of the depicted genotypes  
1288 mated to wild-type males. **(E)** Embryos laid by the same mothers as in D were collected and  
1289 aged to obtain 2 to 5h old embryos. After fixing, they were stained with Hoechst and  $\alpha$ -  
1290 tubulin to visualize the progression of their development. The percentage of developed  
1291 embryos was determined for each maternal genotype. **(F-I)** Control females (*BicD::GFP*,  
1292 *BicD<sup>null</sup>*) and *BicD<sup>hb-deGradFP</sup>* females were used to analyze the effect of knocking down BicD  
1293 using the *hb-deGradFP* construct. After mating them with wild type males, ovaries of the  
1294 mothers and their embryos were used for IF and western blot analysis. **(F)** BicD::GFP (green)  
1295 levels, detected by visualization of endogenous GFP signal, were not affected in *BicD<sup>hb-</sup>*  
1296 *deGradFP* ovaries. Ovaries were also stained with Hoechst to visualize the DNA. Scale bars are  
1297 15  $\mu$ m. **(G)** Ubiquitously degradation of the BicD::GFP protein was detected in *BicD<sup>hb-deGradFP</sup>*  
1298 embryos by Immunofluorescence using anti-GFP antibodies (green). Embryos were also  
1299 stained with anti- $\alpha$ -tubulin antibodies (red) to analyze their development. Scale bars are 100  
1300  $\mu$ m. **(H-I)** Western blots to detect the expression of BicD::GFP and the *deGradFP* construct in  
1301 ovaries **(H)** and 0-2h old embryos **(I)** using anti-GFP and anti-lambda IgG antibodies,  
1302 respectively.  $\alpha$ -tubulin was used as loading control and increasing amounts of cytoplasmic  
1303 extracts were loaded onto the gel for each sample. Degradation of BicD::GFP fusion protein  
1304 was observed in *BicD<sup>hb-deGradFP</sup>* embryos (I), but not in ovaries of the same mothers (H). High  
1305 expression of the *deGradFP* VhhGFP nanobody was detected in *BicD<sup>hb-deGradFP</sup>* embryos by  
1306 Western blots. *deGradFP* VhhGFP was also detected at low levels in ovaries, probably due to  
1307 egg activation and release from metaphase I arrest due to physical egg activation during the  
1308 dissection (see text for details).  
1309  
1310

1311 **Figure 3. Fertilized *BicD*<sup>hb-deGradFP</sup> embryos arresting at the start of embryogenesis with**  
1312 **abnormal spindle figures and over-replicated polar bodies fail to perform pronuclear**  
1313 **fusion. (A-C)** Females of the depicted genotypes were crossed to wild type males. 20-30 min  
1314 old embryos were collected, stained with anti- $\alpha$ -tubulin antibodies to detect the spindles (red),  
1315 anti-Cnn to mark the centrosomes (green) and Hoechst to visualize the DNA (blue). Embryos  
1316 were classified as follows: normal development when they went through the 2<sup>nd</sup> mitotic  
1317 division (showing the presence of four or more zygotic nuclei inside the embryo; arrested  
1318 with centrosomes, when embryos showed one or more inner abnormal spindles with  
1319 centrosomes or free centrosomes positive for Cnn staining; arrested, acentrosomal, when the  
1320 embryos had one or more acentrosomal spindle that was negative for Cnn and did not form  
1321 the rosette-like structure that is typical for meiosis that had proceeded normally. Normal  
1322 completion of meiosis II takes place even in the absence of fertilization when egg activation is  
1323 triggered as the egg passes through the oviduct and ends with the formation of 4 polar bodies  
1324 that arrange in rosette-like structures (mainly fused into a single one) at the surface at the  
1325 embryonic surface and no internal nuclei. We found that the proportion of eggs that looked  
1326 like they have normally completed meiosis II in the absence of fertilization was similar for the  
1327 different genotypes. However, *BicD*<sup>hb-deGradFP</sup> mothers laid a higher proportion of embryos  
1328 classified as arrested with centrosomes and arrested, acentrosomal. Two independent embryo  
1329 collections (n1 and n2) were analyzed. The percentage of embryos observed with the  
1330 indicated phenotypes is depicted in the plot (A). Error bars show the SD. For *BicD::GFP*,  
1331 *BicD*<sup>null</sup>/*BicD::GFP*, *BicD*<sup>null</sup> n1=84, n2=82, for *BicD::GFP*, *BicD*<sup>null</sup>/+; *deGradFP*  
1332 /*deGradFP* n1=55, n2=70 and *BicD*<sup>hb-deGradFP</sup> n1=42, n2=63 were analyzed. Examples of the  
1333 observed phenotypes are shown in B-C. (B) Control embryo (from a *BicD::GFP*, *BicD*<sup>null</sup>  
1334 homozygous mother) going through normal zygotic divisions. (C) (a) *BicD*<sup>hb-deGradFP</sup> embryo  
1335 arrested in development and classified as “arrested with centrosomes”. Upper left panel  
1336 overview of the spindles present in the embryo (stained for  $\alpha$ -tubulin). Panels on the right  
1337 show magnified views of the corresponding spindles marked with boxes observed in this  
1338 embryo. (b) Overview of a *BicD*<sup>hb-deGradFP</sup> embryo classified as “arrested, acentrosomal” and  
1339 magnified view of the individual spindle-like structures marked with yellow boxes. Scale bars  
1340 represent 30  $\mu$ m for entire embryo pictures and 10  $\mu$ m for the magnified spindles. (D-E) DNA  
1341 *in situ* hybridization with probes detecting the presence of X (white) and Y (red)  
1342 chromosomes. Mothers of the indicated phenotype were crossed to wild-type males. Embryos  
1343 were also stained for  $\alpha$ -tubulin (green) and DNA (blue). Both embryos contain a sperm tail  
1344 (arrows). (D) Example of a male embryo in the 2<sup>nd</sup> mitotic metaphase laid by a wild-type  
1345 control mother. Both zygotic nuclei were detected by the Y probe (Y is derived from the  
1346 father) and one the X chromosomal probe (X derived from the mother). Magnified view of



1347 one of the two mitotic spindles is shown in 2. The polar bodies have fused into a single  
1348 rosette, that contains the 3 remaining X chromosomes from the mother (magnified in 1). (E)  
1349 Example of a male embryo derived from a *BicD*<sup>hb-deGradFP</sup> mother. This embryo is arrested  
1350 showing acentrosomal like spindles but containing free centrosomes (arrowheads). The  
1351 paternal pro-nucleus is in metaphase and is marked with two signals for the Y chromosome  
1352 (magnified in 2), indicating that it had undergone one round of replication. The remaining  
1353 nuclei are marked by several dots of the X-chromosome, suggesting that they are over-  
1354 replicated polar bodies (or possibly polar bodies with fragmented DNA) that did not fuse  
1355 (magnified in 1 and 3). Images are z-stack projections through the nuclei. Scales bars  
1356 represent 30  $\mu$ m in all embryo pictures and 5  $\mu$ m in the insets.

1357

1358 **Figure 4. Female meiotic products fail to arrest in metaphase and undergo extra rounds**  
1359 **of replication in unfertilized *BicD*<sup>hb-deGradFP</sup> eggs.**

1360 (A) Females of the depicted genotypes were crossed to XO males to obtain unfertilized eggs.  
1361 0-1 h old eggs were stained for  $\alpha$ -tubulin (red) and DNA (blue). They were classified as  
1362 follows: eggs that seemed to have completed meiosis normally (showing the typical up to four  
1363 rosette like structures that normally fuse into one single rosette); eggs showing a normal  
1364 metaphase I tandem spindle; eggs presenting rosette like structures (1 to 2) plus (1 to 2)  
1365 spindles (probably representing normal meiosis intermediate products); eggs with a big DNA  
1366 blob surrounded by a star of microtubules (MT); eggs containing one big spindle; eggs  
1367 containing several acentrosomal like spindles and eggs with other defects. The percentage of  
1368 eggs showing the described phenotypes was scored. Most control eggs (laid by wild type,  
1369 *BicD*::GFP, *BicD*<sup>null</sup> or *BicD*::GFP, *BicD*<sup>null</sup>/+; *hb-deGradFP* mothers) completed meiosis  
1370 normally. In contrast, *BicD*<sup>hb-deGradFP</sup> mothers laid mainly eggs with several acentrosomal  
1371 spindles and to a lesser extent eggs containing one big spindle. Error bars show the SD of  
1372 three to four independent egg collections (n1 to n4). For *Wild type* n1= 145 n2=95 n3=67, for  
1373 *BicD*::GFP, *BicD*<sup>null</sup>/*BicD*::GFP n1=92 n2=72 n3=147, for *BicD*<sup>null</sup>, *BicD*::GFP/+;  
1374 *deGradFP* /*deGradFP* n1=68 n2=46 n3= 69 n4=67, for *BicD*<sup>hb-deGradFP</sup> n1=29 n2=45 n3=32  
1375 were scored. (B-C) Eggs from the same parents as in A) were subjected to DNA *in situ*  
1376 hybridization with a probe to detect the X chromosome (white),  $\alpha$ -tubulin (red) and DNA  
1377 (Blue). (B) Most eggs in control samples (pictures are from eggs laid by *BicD*::GFP, *BicD*<sup>null</sup>  
1378 homozygous rescued females) show normal completion of meiosis. Magnified pictures of the  
1379 meiotic products for two different control embryos are shown (b, b'). In b, the polar bodies  
1380 have fused into a single rosette. In b', the two rosette like structures contain 1 and 3  
1381 chromosomes, respectively. The polar bodies in each egg contain a total of four X  
1382 chromosomes, corresponding to the four meiotic products that are produced after normal



1383 completion of meiosis II. **(C)** (c) Example of a *BicD*<sup>hb-deGradFP</sup> egg showing the presence of a  
1384 single nucleus with an abnormal rosette like structure, partially de-condensed chromosomes  
1385 and with many dotted X chromosomal signals. (c') Sows a *BicD*<sup>hb-deGradFP</sup> egg that has more  
1386 than four meiotic products. In every spindle many dotted X chromosomal signals can be seen  
1387 on the accompanying magnified pictures (1 and 2). In c'2, the female meiotic products are in  
1388 late anaphase and they have clearly undergone additional replications. Images are z-stack  
1389 projections through the eggs. Scales bars represent 5  $\mu$ m. **(D-E)** Wild type (control) and  
1390 *BicD*<sup>hb-deGradFP</sup> females were crossed to XO males to obtain unfertilized eggs. 0-1 h old eggs  
1391 were collected. **(D)** Eggs were stained for CID (green, marking centromeres), PH3 (red) and  
1392 DNA (blue). 100% (12/12 confocal images) of the single fused rosette nuclei in control eggs,  
1393 showed a strong PH3 staining along the entire chromosomes. In contrast, 90,9 % (10/11 of the  
1394 analyzed confocal pictures) of the single fused rosette-like structures in *BicD*<sup>hb-deGradFP</sup> eggs  
1395 showed a PH3 staining signal that was not localized along the entire chromosomes but was  
1396 only enriched at the pericentromeric region. 86% (6/7 confocal images) of the single fused  
1397 rosette-like nuclei in control eggs showed a normal CID staining. In contrast, 63.7 % (7/11 of  
1398 the analyzed confocal pictures) of the single rosette-like structures in *BicD*<sup>hb-deGradFP</sup> eggs  
1399 showed an increase number of CID-positive dots. **(E)** Eggs were stained for  $\alpha$ -tubulin (red), PH3  
1400 (green) and DNA (blue). Nuclei in Ec labeled 1-3 are the magnified nuclei observed in the embryo  
1401 depicted in Ec'. Images are z-stack projections through the nuclei. Scale bars represent 5  $\mu$ m, except in  
1402 Ec' where scale bar represents 10  $\mu$ m.

1403

1404 **Figure 5. SAC components BubR1 and Mad2 are not properly recruited to female**  
1405 **meiotic products in *BicD*<sup>hb-deGradFP</sup> eggs.** Control females (either wild type or rescued  
1406 *BicD::GFP*, *BicD*<sup>null</sup>) (a), and *BicD*<sup>hb-deGradFP</sup> females (b-d) were crossed to XO males to  
1407 obtain unfertilized eggs. 0-1 h old eggs were collected. Eggs were stained for  $\alpha$ -tubulin (red),  
1408 DNA (blue) and BubR1 **(A)** or Mad2 **(B)** (green signals). **(A a)** The meiotic products fused  
1409 into a single rosette in a wild-type control egg showed BubR1 staining at the kinetochores.  
1410 **(A b)** Example of *BicD*<sup>hb-deGradFP</sup> egg containing a unique rosette-like polar body showing no  
1411 signal for BubR1. **(A c)** Example of a *BicD*<sup>hb-deGradFP</sup> egg with only one polar body showing a  
1412 weak staining for BubR1. **(A d)** *BicD*<sup>hb-deGradFP</sup> egg with several meiotic products that are  
1413 negative for BubR1. **(A d')** magnified images of the indicated nuclei observed in d).  
1414 **(B a)** Shows an example of the unique polar body rosette structure observed in a control egg  
1415 (derived from a *BicD::GFP*, *BicD*<sup>null</sup>), where Mad2 is present at the polar body kinetochores.  
1416 **(B b)** Shows a *BicD*<sup>hb-deGradFP</sup> egg where the unique rosette-like polar body present shows no  
1417 signal for Mad2. **(B c)** Example of a *BicD*<sup>hb-deGradFP</sup> egg with only one polar body that shows  
1418 a weak staining for Mad2. **(B d)** *BicD*<sup>hb-deGradFP</sup> egg where the female meiotic products have

1419 replicated and are negative for Mad2 staining. Scale bars represent 5  $\mu\text{m}$ . Images are z-stack  
1420 projections through the nuclei. Scale bars represent 5  $\mu\text{m}$ .

1421

1422 **Figure 6. Localization of D-TACC, Msps and Clc at the meiosis II tandem spindles is**

1423 **affected in *BicD*<sup>hb-deGradFP</sup> eggs. (A)** 0-5 min old eggs laid by females expressing maternally a

1424 *Chc::mcherry* fusion protein were stained for  $\alpha$ -tubulin (green). *Chc::mCherry* signal (red)

1425 was directly detected to visualize the *Chc* fusion protein localization. *Chc* is clearly present

1426 along both metaphase II tandem spindles (arrows) and at the central aster (arrowhead).

1427 Scheme of the Metaphase II tandem spindle. DNA is shown in blue. Interpolar MTs are

1428 shown in green and kinetochore microtubules in gray. Minus ends (-) and plus ends (+) of

1429 MTs are marked. The central aster is drawn as a green ring with emanating MTs with

1430 antiparallel +/- directed MTs. **(B)** Wild type embryos were stained for BicD (red) and  $\alpha$ -

1431 tubulin (green). BicD was detected in the cytoplasm but neither excluded from nor enriched

1432 at the meiotic spindles. **(C-E)** 5 min collections of control (laid either by *BicD::GFP*, *BicD*<sup>null</sup>

1433 homozygous mothers in C-D or wild-type mothers in E) and *BicD*<sup>hb-deGradFP</sup> embryos were

1434 stained for  $\alpha$ -tubulin (red) and either D-TACC **(C)**, Msps **(D)** or Clc **(E)** (green). DNA is

1435 shown in blue. The pictures represent maximum projections of several frames. The spindle

1436 shown on top is the more superficial one in the embryo. The signal is stronger for this spindle

1437 and the signal on the spindle below is often masked by the cytoplasmic signal in the upper

1438 frames. For images in E, the images were subject to bleach and depth correction in Image J

1439 (see methods). Images were acquired in a way that the signal in the central aster is maximum

1440 but below saturation for all spindles. Examples of embryos in Metaphase II and Anaphase II

1441 are shown. **(C)** D-TACC is clearly enriched in the central aster (arrowhead) and along the

1442 meiotic spindles (arrows) in control embryos. In *BicD*<sup>hb-deGradFP</sup> embryos, the signal on the

1443 spindles is reduced compared to the signal intensity on the central aster. **(C')** The percentage

1444 of embryos showing a strong (+), a weak (+/-) or no (-) signal for TACC along the spindle

1445 (compared to the enrichment at the central aster) is shown for both genotypes. **(D)** Msps is

1446 localized to the central aster (arrowhead) and at the tandem spindles, where it is enriched at

1447 the minus end poles in control embryos (arrowheads). In *BicD*<sup>hb-deGradFP</sup> embryos, the signal at

1448 the spindle was reduced compared to the signal observed at the central aster. Sometimes the

1449 signal at the poles, although weak, could still be observed. **(D')** The percentage of embryos

1450 showing a strong (+) or very weak or no (-) signal for Msps along the spindle is shown for

1451 both genotypes. **(E)** Clc localization in metaphase tandem spindles. Clc is localized along the

1452 spindles and at the central aster. In embryos with reduced BicD levels, although Clc signal

1453 can still be observed along the tandem spindles, there was an unusual accumulation of Clc at

1454 the central aster. **(E')** The percentage of embryos showing a normal (+) or a reduced spindle

1455 localization compared with an unusual enrichment of Clc at the central aster (–) is shown for  
1456 both genotypes. (N) Number of embryos scored for each genotype was the sum of the  
1457 embryos imaged from two independent immunostainings experiments. Scale bars represent 5  
1458  $\mu\text{m}$ .

1459 **Figure 7. *Drosophila* Chc binds to D-TACC through the same domain it interacts with**  
1460 **BicD. (A)** Interaction tests in the yeast two-hybrid system. The full-length (FL) and two  
1461 different fragments of Chc (aminoacids 329-542 and 329-803) were fused to the DNA  
1462 binding domain (BD). Full-length D-TACC wild type (WT) and *TACC*<sup>S863A</sup> were fused to the  
1463 activator domain (AD). Empty vectors were used as negative controls. Full-length Chc and  
1464 Chc (aa 329-803; the region that interacts with BicD), interact with D-TACC. The interaction  
1465 was not affected by the *D-TACC*<sup>S863A</sup> mutation. **(B)** IP of total embryo extracts expressing a  
1466 Myc-tagged Chc fusion protein (Myc::Chc). Antibodies used for the IPs are indicated on top.  
1467 Anti-BicD antibodies (4C2 and 1B11), anti-Myc antibody and beads alone as a negative  
1468 control were used. As an additional negative control, total wild-type (wt) embryo extract was  
1469 used for pull down with anti-Myc antibodies. Western blots of the precipitated material were  
1470 tested for the presence of BicD, Clc, D-TACC and Myc::Chc. 0.15% of the cytoplasmic  
1471 extract used for each IP was loaded as input. Lower panel show a longer exposure of the  
1472 Myc::Chc signal.

1473

1474 **Figure 8. *d-tacc* is needed in the mother for pronuclear fusion and replication of**  
1475 **parental chromosomes in the embryo.** *Wild-type* embryos and embryos laid by *d-tacc*<sup>1</sup>/*Df*  
1476 *3R(110)* mothers crossed to wild-type males were subjected to DNA *in situ* hybridizations  
1477 with probes detecting the X chromosome (white) and the Y chromosome (red).  $\alpha$ -tubulin  
1478 (green) and DNA (Blue) were also stained. For each genotype, examples of male embryos are  
1479 shown. For wild type, an embryo in the first mitotic cycle (upper panel) and an embryo that  
1480 went through several mitoses (lower panel) are shown. In both embryos, the zygotic internal  
1481 nuclei contain a clear signal for the X and the Y chromosomes. The remaining polar body  
1482 (seen only in the upper embryo) contains a clear signal only for the X chromosome. Note that  
1483 a very weak, but unspecific, signal for the Y chromosome (probably due to weak cross  
1484 reactivity to the 2<sup>nd</sup> or 4<sup>th</sup> chromosome) is observed in some of the female meiotic polar  
1485 bodies in wild type and *d-tacc*<sup>1</sup> mutant embryos. In *d-tacc*<sup>1</sup>, polar bodies are marked by the  
1486 presence of the X chromosome, however zygotic internal nuclei marked only by the presence  
1487 of the Y chromosome are observed, indicating a problem in pronuclear fusion. Images are z-  
1488 stack projections through the nuclei.

1489

1490 **Figure 9. Knockdown of *BicD* in *Drosophila* tissue culture cells affects mitosis. *BicD* and**  
1491 ***Chc* genetically interact in cells and embryos.**

1492 S2 *Drosophila* cells were incubated with dsRNA against *BicD*, *Chc*, *Clc* or a combination of  
1493 them. Cells transfected with dsRNA against *GFP* were used as control. Double amount of  
1494 dsRNA against *GFP* was used (*2xGFP*) for controls of double knockdown cells. Knockdowns  
1495 were done in triplicates (1 to 3). **(A,D)** Western Blot showing the efficient knock down of the  
1496 proteins after 3 days of dsRNA treatment detected with anti-*BicD* or *Clc* antibodies.  $\alpha$ -tubulin  
1497 levels were used as loading control. Anti-*Clc* was used to detect degradation of *Chc* and *Clc*  
1498 since RNAi against one Clathrin subunit reduces the levels of both subunits. **(B, D)** The  
1499 percentage of abnormal cells, either showing more than two or fragmented centrosomes  
1500 (Cent.) (black bars) or multipolar spindles (gray bars) is depicted in the graphs for each  
1501 treatment and plotted as the difference with the corresponding dsRNA against the  
1502 corresponding *GFP* control. *Drosophila* tissue culture cells are known to display certain level  
1503 of such defects due to polyploidy. However, cells treated with *dsRNA* against *BicD*, *Chc* and  
1504 *Clc* showed an enhancement of these phenotypes. Double knock down of *BicD* and either *Chc*  
1505 or *Clc* reduced the number of abnormal mitoses. 120 to 200 cells were counted for each  
1506 individual treatment. Error bars represent SE of the difference in means between the  
1507 treatments. **(C)** Examples of the spindle phenotypes observed. Cells were stained for  $\alpha$ -  
1508 tubulin (red), Cnn (green) and DNA (blue). Normal cells are expected to have bipolar  
1509 spindles and two centrosomes (Cent.). Scale bars are 5  $\mu$ m. **(F)** Percentage of embryos that  
1510 hatched into larvae. The depicted genotypes are the ones of the mothers (crossed to *wild-type*  
1511 males) that laid the eggs. **(G)** Embryos laid by the same mothers as in A were collected and  
1512 aged 2 to 5 h. After fixing, they were stained with Hoechst and with anti  $\alpha$ -tubulin to follow  
1513 their development. The percentage of developed embryos was counted for each maternal  
1514 genotype.

1515

1516 **Figure 10. *C. elegans chc-1* and *tac-1* are required for meiosis and pronuclear fusion.**

1517 Images from fluorescent microscopy time-lapse sequences **(A-E, G)** or single confocal  
1518 pictures **(F, H)** of **(A)** control (*RNAi*), **(B-C)**, *tac-1* (*RNAi*) and **(D, F-G)** *chc-1* (*RNAi*) and  
1519 **(E)** *bicd-1* (*RNAi*) embryos expressing *H2B::mCherry* and  *$\alpha$ -tubulin::GFP*. Pictures are  
1520 oriented with anterior (A) to the left and posterior (P) to the right. Female and male pronuclei  
1521 are indicated in the first time-lapse micrograph. Time lapse pictures indicate the elapsed time  
1522 (in minutes and seconds) from the start of the movie at 00:00 with the female pronucleus still  
1523 at the anterior. **(A)** Shows a control embryo that developed normally. **(B)** Shows a *tac-1 RNAi*  
1524 embryo where polar body extrusion is delayed (arrowhead). The female pronucleus migrated  
1525 to the posterior towards the male pronucleus. Meanwhile, the male pronucleus made a

1526 spindle on its own. Although both pronuclei met at the posterior and formed a common  
1527 spindle, no fusion of pronuclear DNA is observed. **(C)** In this *tac-1 RNAi* embryo, the female  
1528 pronucleus did not migrate to the posterior and pronuclear fusion did not take place. The male  
1529 pronucleus formed its own spindle. **(D)** Shows a *chc-1 (RNAi)* embryo where the female  
1530 pronucleus migrated slowly to meet the male pronucleus at the posterior but no pronuclear  
1531 fusion was observed. **(E)** Shows a *bicd-1 (RNAi)* where the female pronucleus migrated to  
1532 meet the male pronucleus at the posterior but no pronuclear fusion was observed. **(F)** This  
1533 *chc-1 (RNAi)* embryo arrested in metaphase of meiosis. **(G)** Shows a 2 cell stage *chc-1*  
1534 *(RNAi)* embryo, with premature capture of a polar body (PB). The PB DNA fused with the  
1535 AB blastomere DNA. **(H)** Shows an example of a dying *chc-1 (RNAi)* embryo with vacuoles.  
1536 Scale bars are 10  $\mu\text{m}$ .

1537

1538 **Supplementary Figure S1. In syncytial *Drosophila* embryos Chc and Clc localize to**  
1539 **mitotic spindles and centrosomes throughout cell cycle. (A)** Embryos laid by *BicD<sup>mom</sup>*  
1540 females were fixed and subjected to immunostaining to detect  $\alpha$ -tubulin (red), Cnn (green)  
1541 and DNA (blue). Wild-type embryos were used as control. *BicD<sup>mom</sup>* embryos arrested in early  
1542 embryogenesis showing few spindles and rosette structures. Abnormal spindles with detached  
1543 and multiple centrosomes and centrosomes not associated to any DNA were observed. Scale  
1544 bars are 20  $\mu\text{m}$ . **(B)** Localization of a Myc-tagged Chc fusion protein (green) in embryos laid  
1545 by *Nanos-Gal4 > pUASP-Myc::Chc* females. Chc is enriched apically where it further  
1546 accumulates in a punctate pattern above each blastoderm nucleus (arrow). Scale bars are 30  
1547  $\mu\text{m}$ . **(C)** Embryos laid by mothers having a lethal allele of *Chc* (*Chc<sup>l</sup>*) but rescued with two  
1548 copies of a Flag-tagged Chc expressed from the 4C-CHC construct (Kasprowicz et al., 2008)  
1549 were stained to detect Chc and the pericentrosomal marker Cnn using anti-Flag antibodies  
1550 (Red) and anti-Cnn antibodies (green), respectively. DNA is shown in blue. Both proteins co-  
1551 localized at the centrosomes. A magnified region of an embryo in prophase is shown. **(D)**  
1552 Embryos from mothers expressing a Chc::eGFP fusion protein (Green) (Li et al., 2010) and  
1553 histone-RFP (red; to visualize the chromosomes) were subject to live imaging. Chc::eGFP  
1554 localized to the centrosomes and spindles throughout the cell cycle. **(E)** Embryos from  
1555 mothers expressing a Clathrin light chain (Clc) fused to GFP (Clc::GFP) under the Maternal-  
1556 Tubulin promoter were devitelinized by hand to preserve the Clc::GFP signal and subjected to  
1557 immunostaining to detect  $\alpha$ - tubulin and Cnn. A magnified picture of a region of an embryo  
1558 in metaphase and another in prophase are shown. Left panels show an overlay of the signals  
1559 for  $\alpha$ -tubulin (red), Cnn (green) and DNA (blue). Middle panels show the signal for DNA  
1560 (blue) and Clc::GFP (green). Right panels show the signal for Clc::GFP in gray. Like Chc,



1561 Clc is localized to the mitotic spindles and centrosomes throughout the cell cycle. The side  
1562 view reveals an apical enrichment as well. Scale bars represent 10  $\mu$ m in C-E.

1563

1564 **Supplementary Figure S2. Although the deGradFP protein is detected in ovaries of**  
1565 ***BicD*<sup>hb-deGradFP</sup> females, *BicD*<sup>hb-deGradFP</sup> stage 14 oocytes show apparently normal meiosis I**

1566 **spindles. (A)** Ovaries from control (homozygous *BicD*::*GFP*, *BicD*<sup>null</sup>) or *BicD*<sup>hb-deGradFP</sup>

1567 females were dissected in Robbs medium to prevent oocyte activation. They were then

1568 subjected to Western blotting using anti-Lamma IgG antibodies to detect the deGradFP fusion

1569 protein.  $\alpha$ - tubulin was used as loading control. **(B)** Stage 14 oocytes from control

1570 (homozygous *BicD*::*GFP*, *BicD*<sup>null</sup>) or *BicD*<sup>hb-deGradFP</sup> females were prepared and stained to

1571 detect  $\alpha$ -tubulin (red) and DNA (blue). Metaphase I oocyte spindles were imaged. **(C)**

1572 Spindles were classified as normal, when they showed a normal bipolar appearance or as

1573 abnormal when multipolar spindles were observed. Images are confocal z-stack projections.

1574 Scale bars are 2  $\mu$ m.

1575

1576 **Supplementary Figure S3. Arrested fertilized *BicD*<sup>hb-deGradFP</sup> eggs show abnormal**  
1577 **spindles with centrosomes whereas non-fertilized *BicD*<sup>hb-deGradFP</sup> eggs have acentrosomal**

1578 **spindles. (A-B)** Virgin *BicD*<sup>hb-deGradFP</sup> females were crossed to males that expressed a fusion

1579 protein between Don Juan (Dj) and mCherry (Dj::mCherry) under the control of the

1580 endogenous *Dj* promoter. Dj associates with sperm tails, and the fertilizing sperm tail ends up

1581 in the cytoplasm of the *Drosophila* egg (Santel et al., 1997). Embryos laid by these females

1582 were collected and stained to detect  $\alpha$ -tubulin too. mCherry fluorescence was preserved with

1583 MetOH fixation. **(A)** Dj:mCherry can be detected on the sperm tail only in young embryos

1584 (with few zygotic nuclei) . **(B)** After Dj::cherry is shed from the sperm tail during the first

1585 mitotic divisions, the presence of the sperm tail could still be followed for some time during

1586 the late syncytial divisions with  $\alpha$ -tubulin staining that detects the sperm tail also in older

1587 embryos. Images are confocal z-stack projections. Scale bars represent 25  $\mu$ m.

1588

1589 **Supplementary Figure S4. Unfertilized *BicD*<sup>hb-deGradFP</sup> eggs produce abnormal meiotic**  
1590 **products that undergo extra rounds of replication.**

1591 Control (homozygous *BicD*::*GFP*, *BicD*<sup>null</sup>) and *BicD*<sup>hb-deGradFP</sup> virgin females were crossed to

1592 XO males to collect unfertilized eggs. Eggs were subjected to DNA *in situ* hybridization with

1593 a probe that detects the presence of the 2<sup>nd</sup> chromosome (white),  $\alpha$ -tubulin (green) and DNA

1594 (Blue). **(A)** Eggs in control samples show normal completion of meiosis. Magnified pictures

1595 of the meiotic products observed in two different eggs are shown (a, a'). In a, the four meiotic

1596 products have fused into a single polar body with a rosette shape. In the egg depicted in a' the



1597 meiotic products have fused into two rosette-like structures. The polar bodies in each egg  
1598 contain in total four dots of signal for the 2<sup>nd</sup> chromosome, corresponding to the four meiotic  
1599 products that are produced after normal completion of meiosis II. **(B)** (b) Example of a  
1600 *BicD*<sup>hb-deGradFP</sup> egg showing the presence of a single big nucleus without the typical rosette-  
1601 like structure. The chromatin appears de-condensed with many signals for the 2<sup>nd</sup>  
1602 chromosome. (b') A *BicD*<sup>hb-deGradFP</sup> egg that has three meiotic products without the typical  
1603 rosette-like appearance. In all nuclei, the second chromosome probe generates many dots.  
1604 (b'') Egg with many meiotic products marked with numerous 2<sup>nd</sup> chromosome signals. Images  
1605 are confocal z-stack projections. Scale bars represent 10  $\mu$ m.

1606

1607 **Supplementary Figure S5. *Drosophila* Chc uses the same region to interact with both**  
1608 **BicD and D-TACC** in the yeast two-hybrid system **(A)**. Interaction test of full-length and  
1609 BicD C-terminal Domain (CTD) fused to the DNA activation domain (AD) with Chc full-  
1610 length (FL) and a Chc fragment comprising aminoacids 329 to 542 fused to the DNA binding  
1611 domain (BD). Full-length Egl was used as positive control for the interaction. BicD FL and  
1612 BicD CTD interact with full length Chc but not with the short fragment. **(B)** Interaction test of  
1613 the elongated Chc fragment (aminoacids 329-807) fused to the AD with BicD FL and BicD  
1614 CTD in the BD. The extended fragment can interact with the BicD CTD. **(C)** Interaction test  
1615 between Chc FL with D-TACC wild type (WT), *D-TACC*<sup>S863A</sup>, and *D-TACC*<sup>S863D</sup>. Chc  
1616 interacts with all D-TACC variants, but the interaction is stronger with *D-TACC*<sup>S863D</sup>. **(D)**  
1617 Interaction test of BicD CTD in the BD with the same versions of D-TACC used in C. No  
1618 interaction between BicD and D-TACC was observed. Egl was used as positive control to test  
1619 the interaction with BicD. Empty vectors were used as negative controls.

1620

1621 **Supplementary Figure S6. Knockdown of one Clathrin subunit reduces the levels of**  
1622 **both subunits in *Drosophila* cells in culture.** *Drosophila* S2 cells from the experiment  
1623 shown in Fig. 10 were subjected to western blot **(A)** and Immunofluorescence **(B)** to confirm  
1624 the knockdown of Chc and Clc, respectively. Briefly, the cells were incubated with dsRNA  
1625 against *BicD*, *Chc* or *Clc*. Cells transfected with dsRNA against GFP were used as controls.  
1626 **(A)** Western blot showing the efficient knock down of Chc and BicD after 3 days of dsRNA  
1627 treatment.  $\alpha$ -tubulin levels were used as loading controls. Treatment of the cells with Clc  
1628 RNAi also led to a knockdown of Chc. (Knockdown of Clc upon Chc RNAi treatment is  
1629 shown in Fig. 10) **(B)** After knockdown with the indicated RNAi, cells were subjected to  
1630 immunofluorescence to detect Clc (green),  $\alpha$ -tubulin (red) and DNA (blue). The signal for  
1631 Clc was reduced upon Chc and Clc RNAi knockdown.

1632

1633 **Supplementary Figure 7. The few *BicD*<sup>hb-deGradFP</sup> embryos that continue through the**  
1634 **syncytial mitotic divisions are enriched for embryos in metaphase.** Females of the  
1635 depicted genotypes were crossed to wild type males. 30-60 min old embryos were collected,  
1636 stained with anti  $\alpha$ -tubulin antibody to detect the spindles (red), anti-Cnn to mark the  
1637 centrosomes (green) and Hoechst to visualize the DNA (blue). The few embryo that went  
1638 through the 2<sup>nd</sup> mitotic division were counted and scored as being in:  
1639 prometaphase/metaphase (PM/M), anaphase (A), telophase (T) and interphase or prophase  
1640 (I/P). Two independent collections were classified and counted. The graph shows the average  
1641 and the SD. The n values depicted in the picture are total numbers of embryos scored.

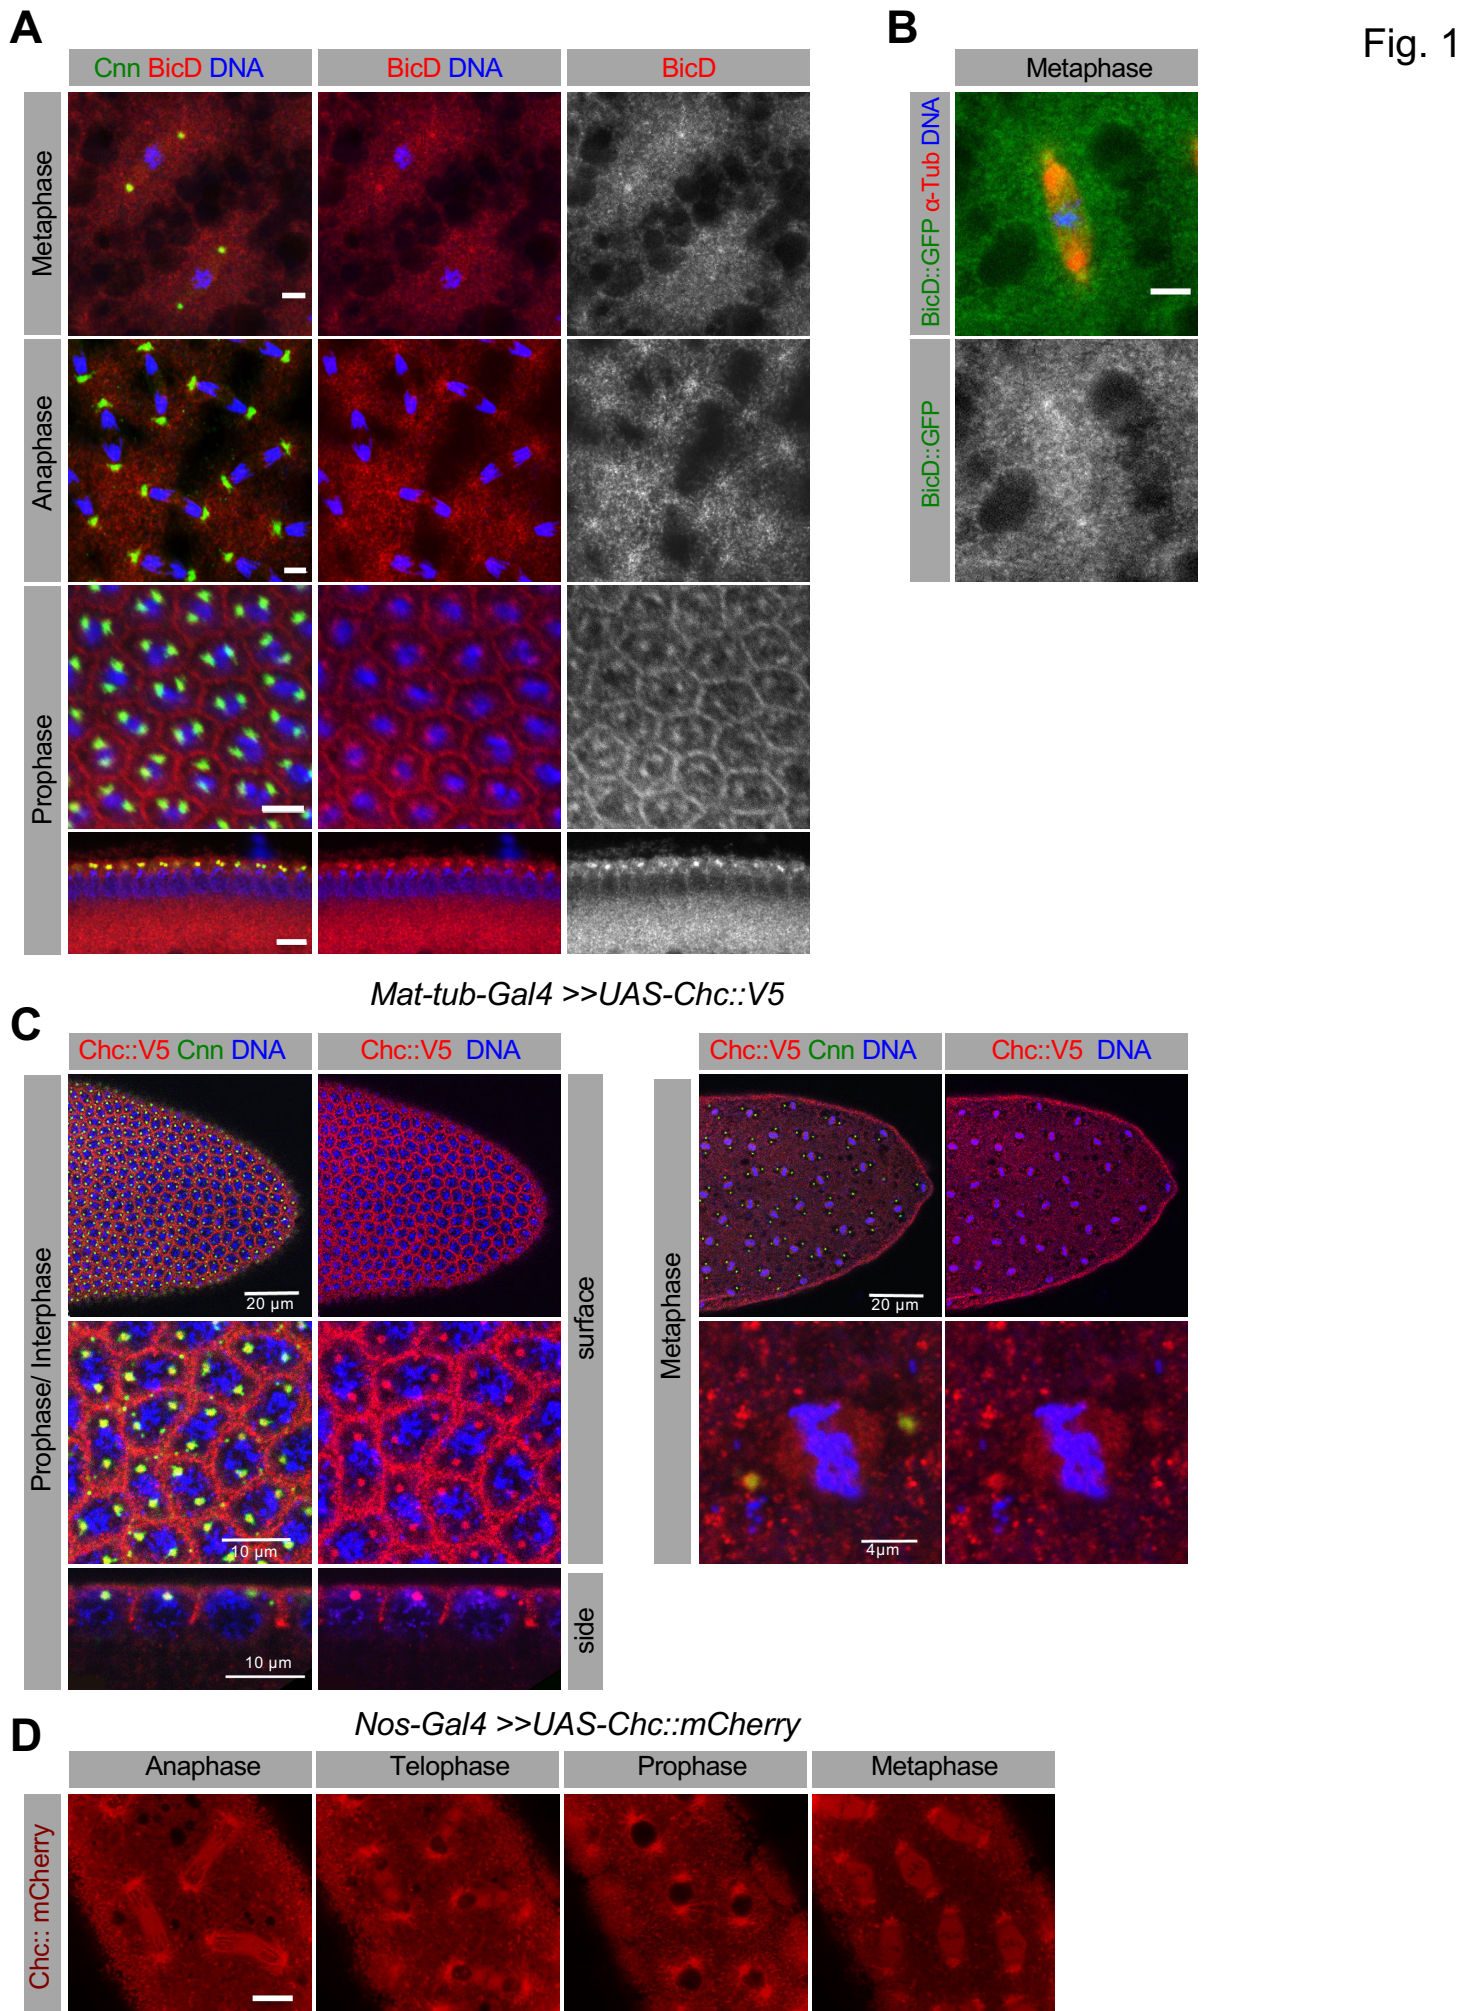



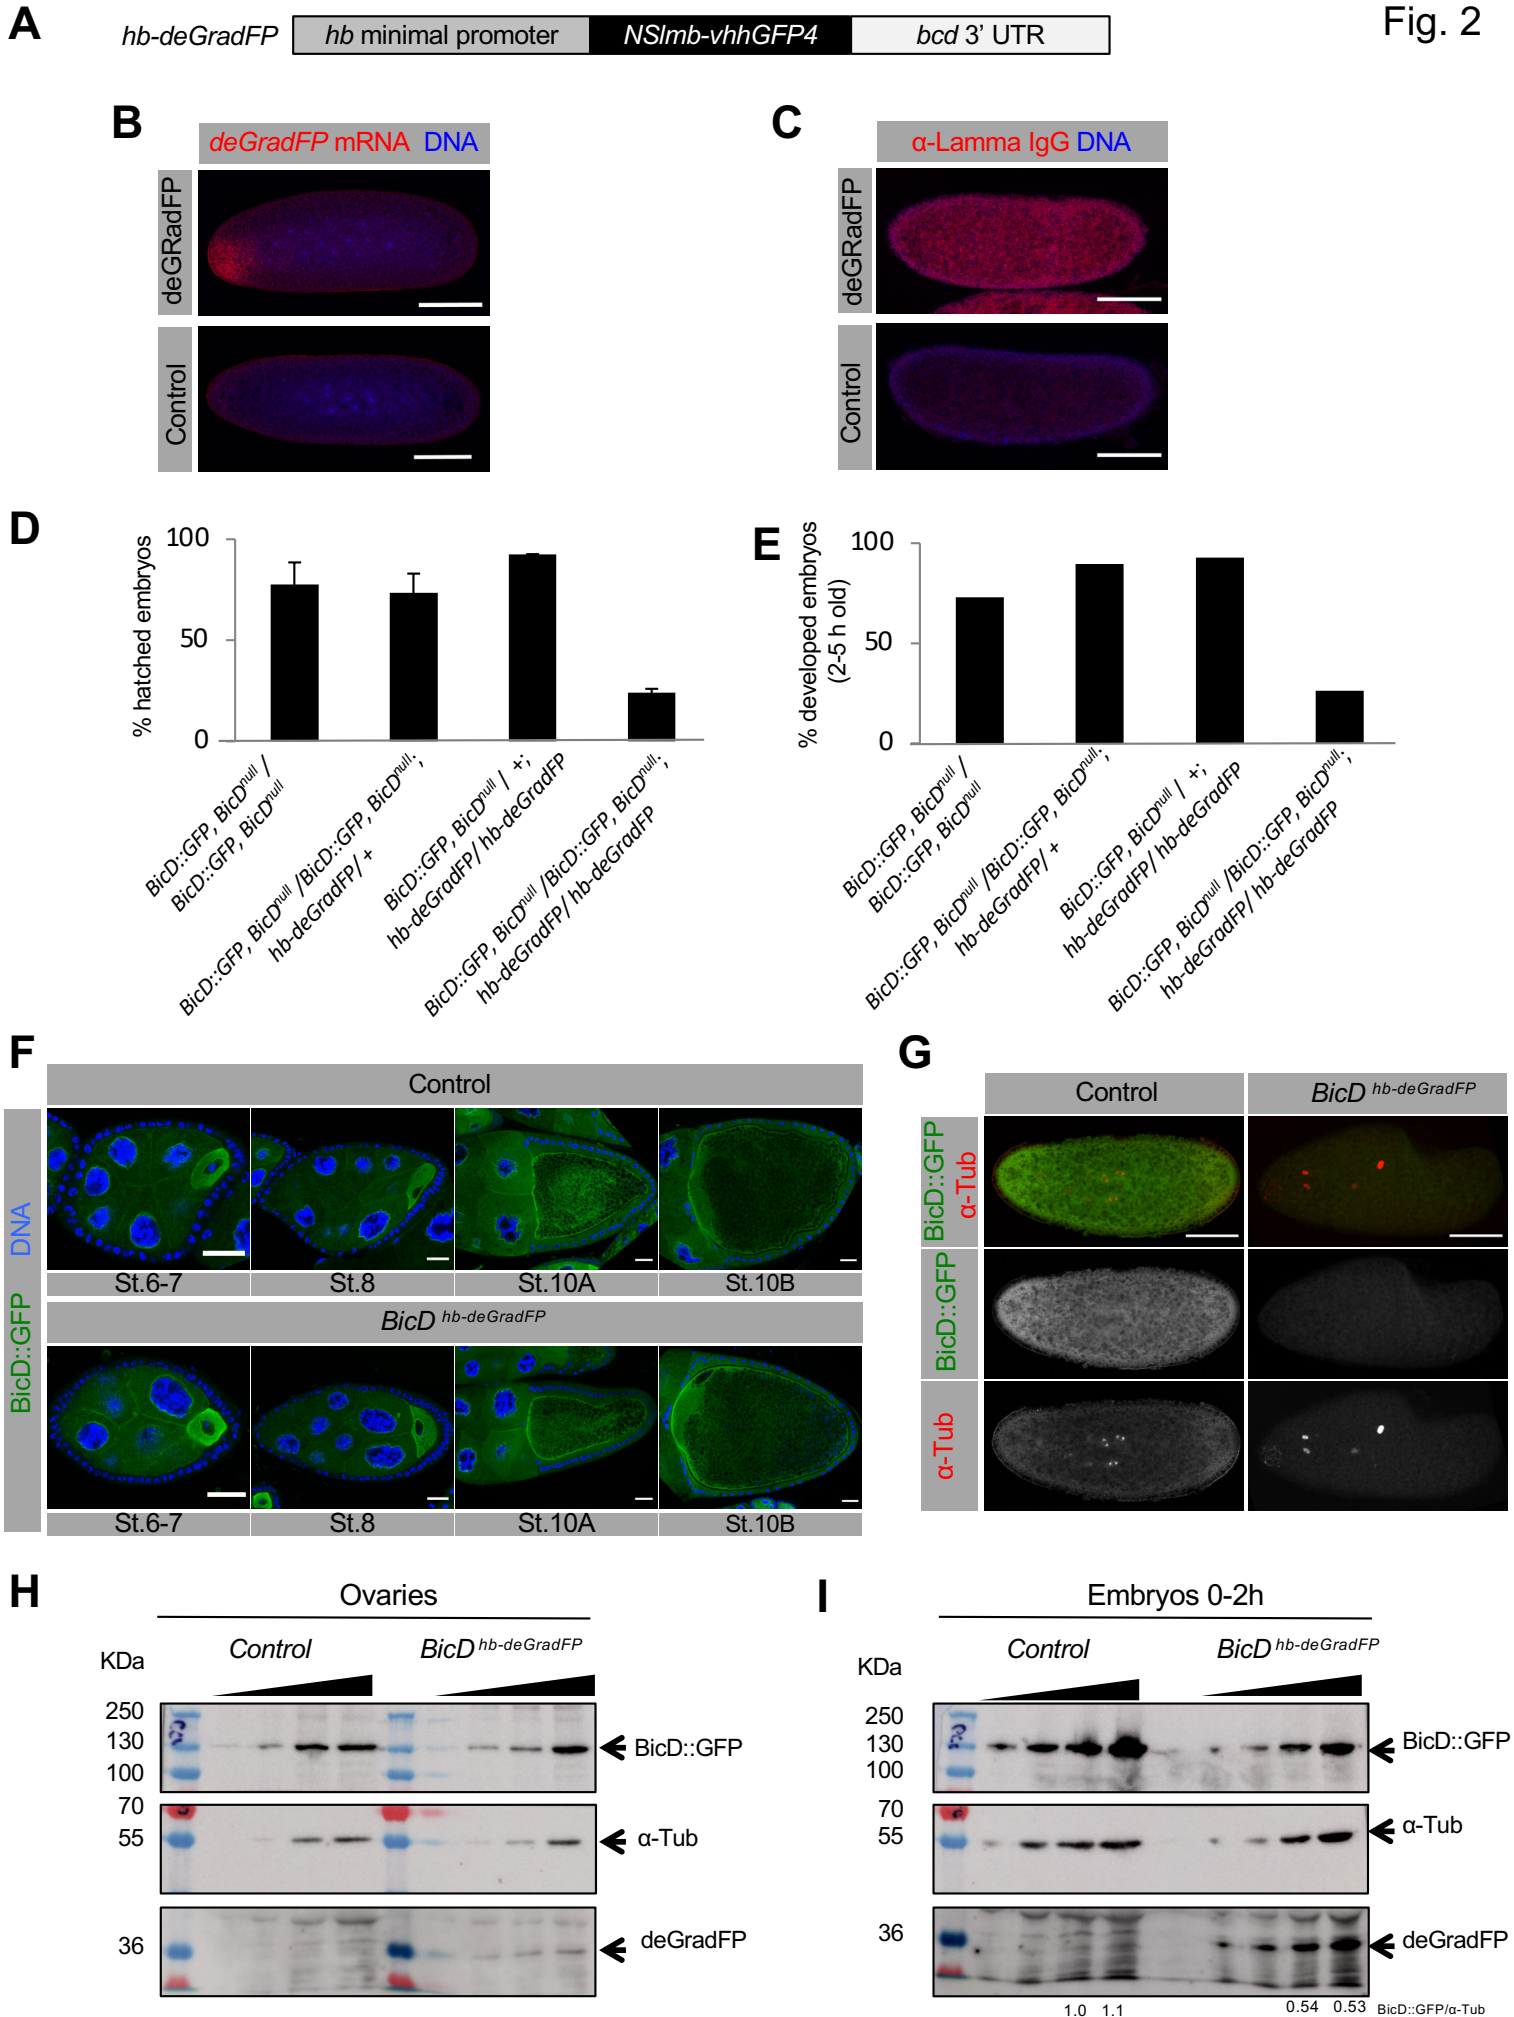

Fig. 3

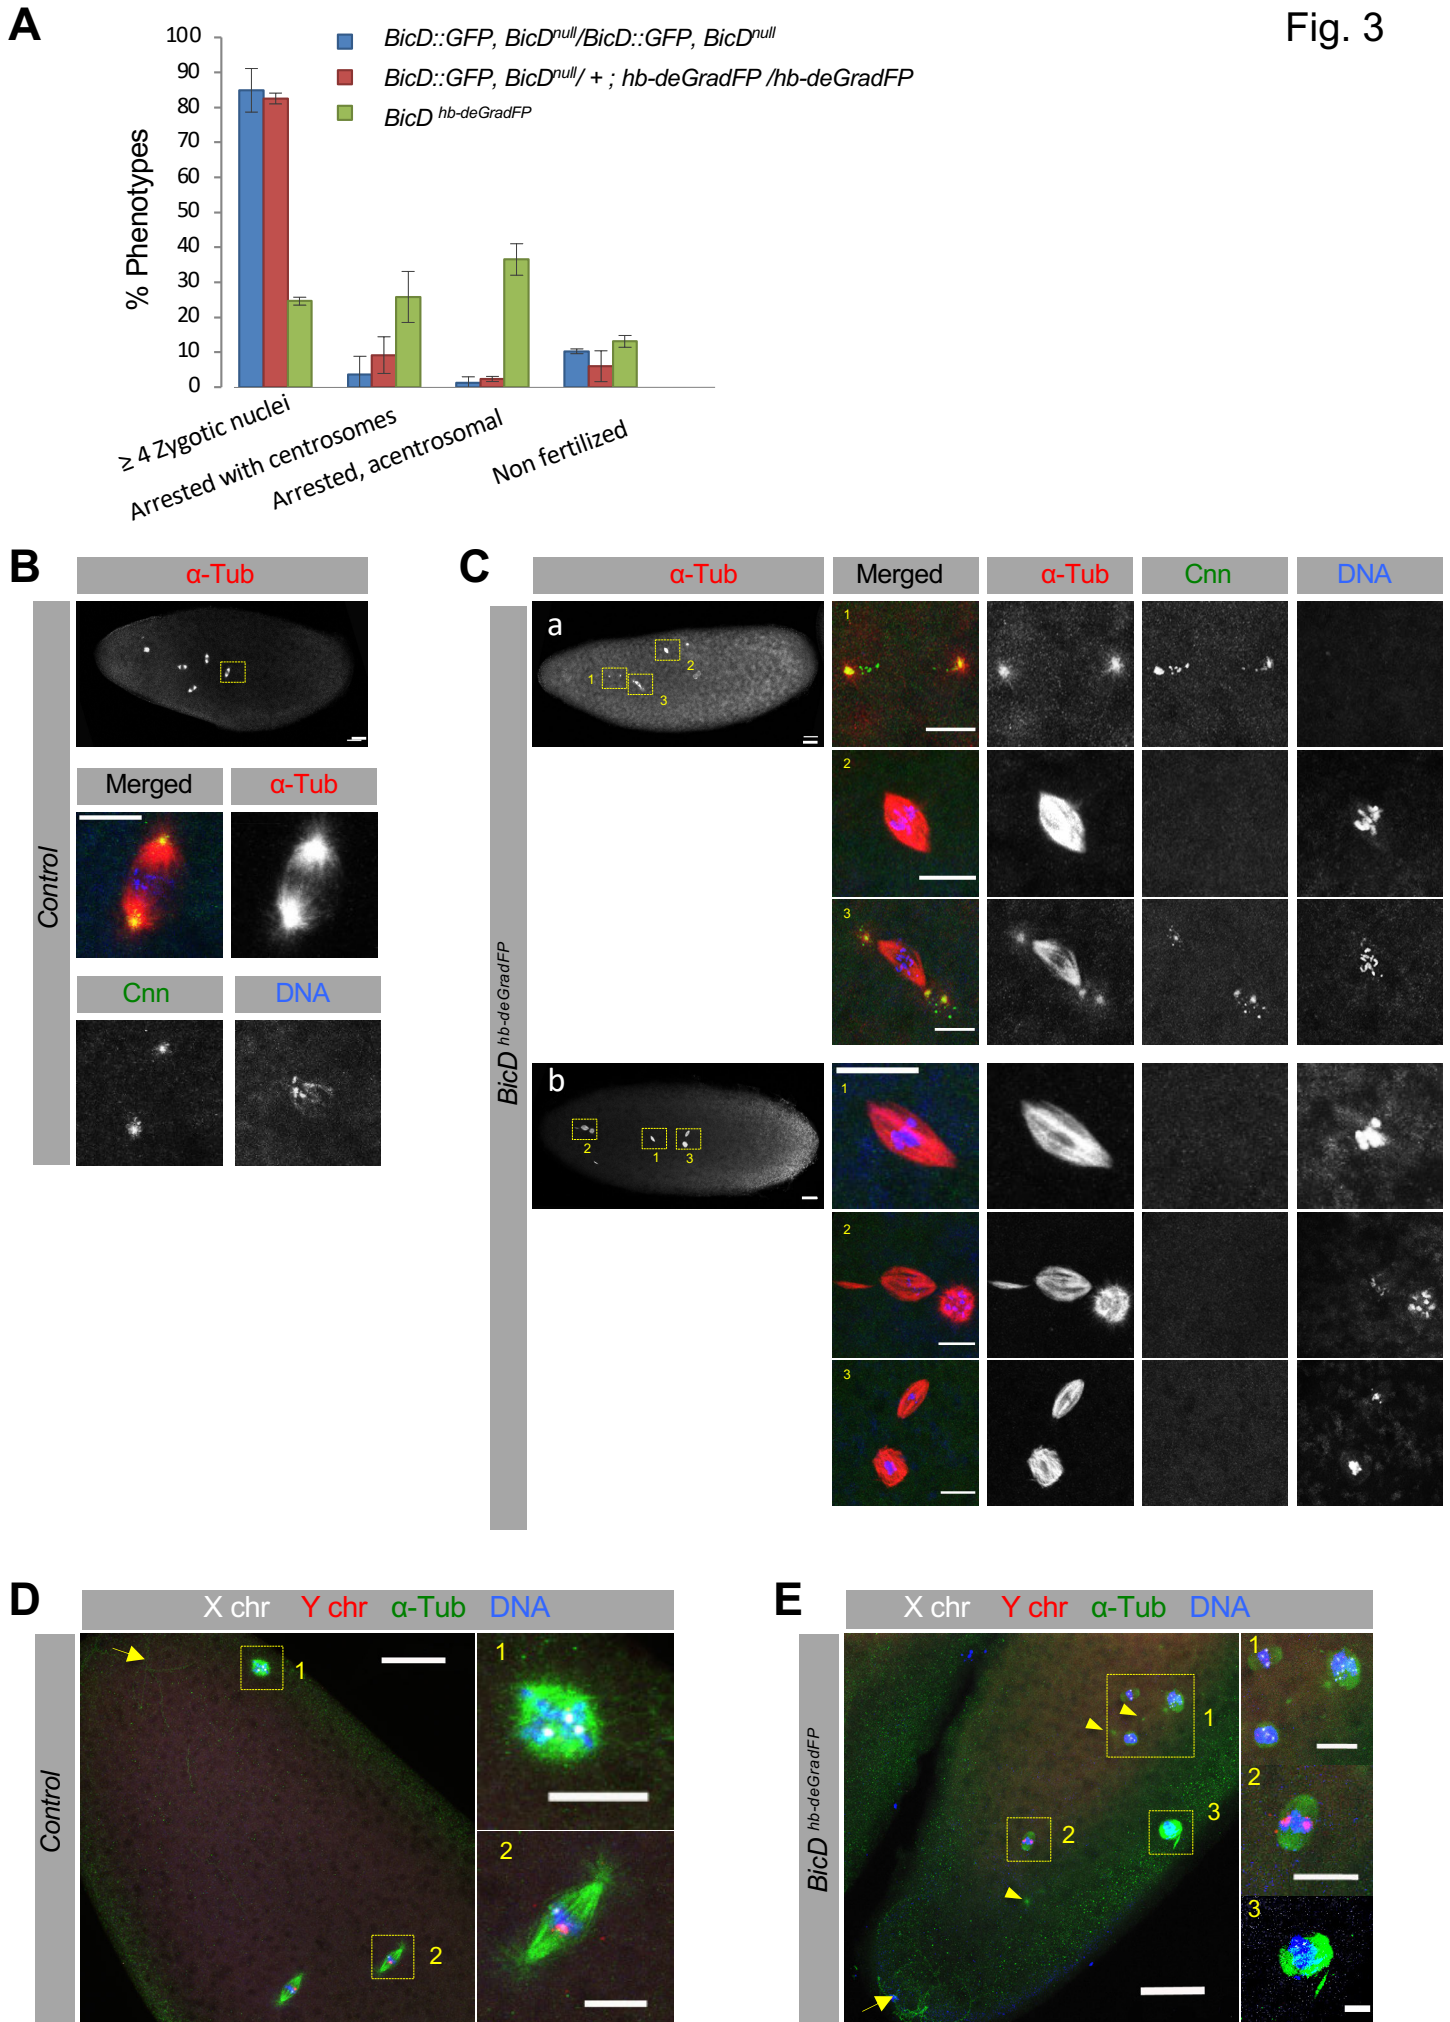



Fig. 4

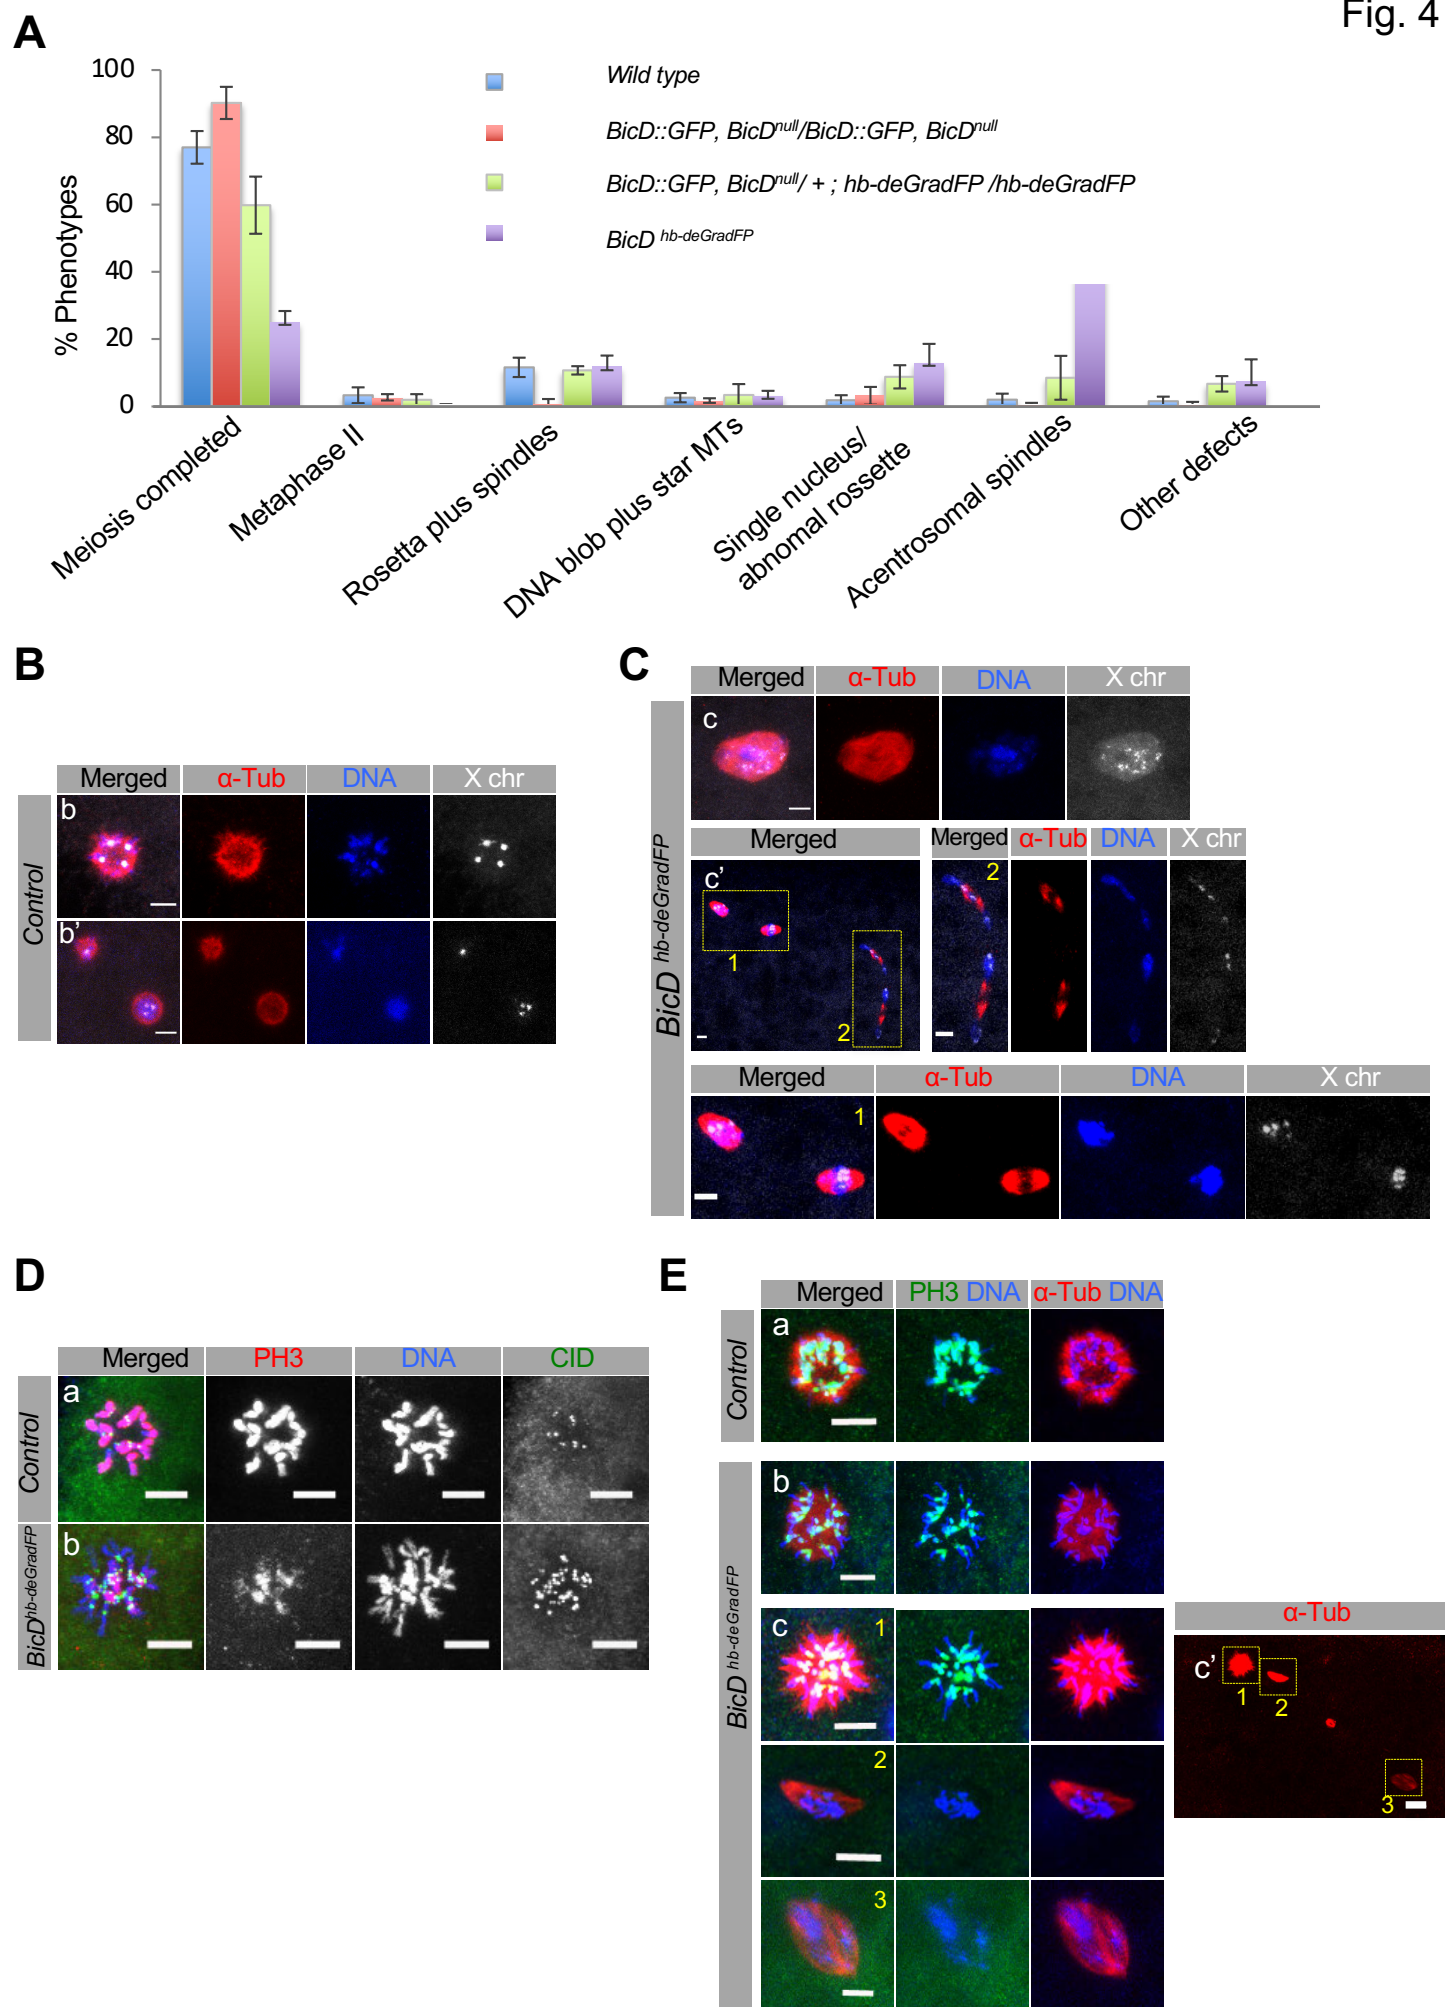



Fig. 5

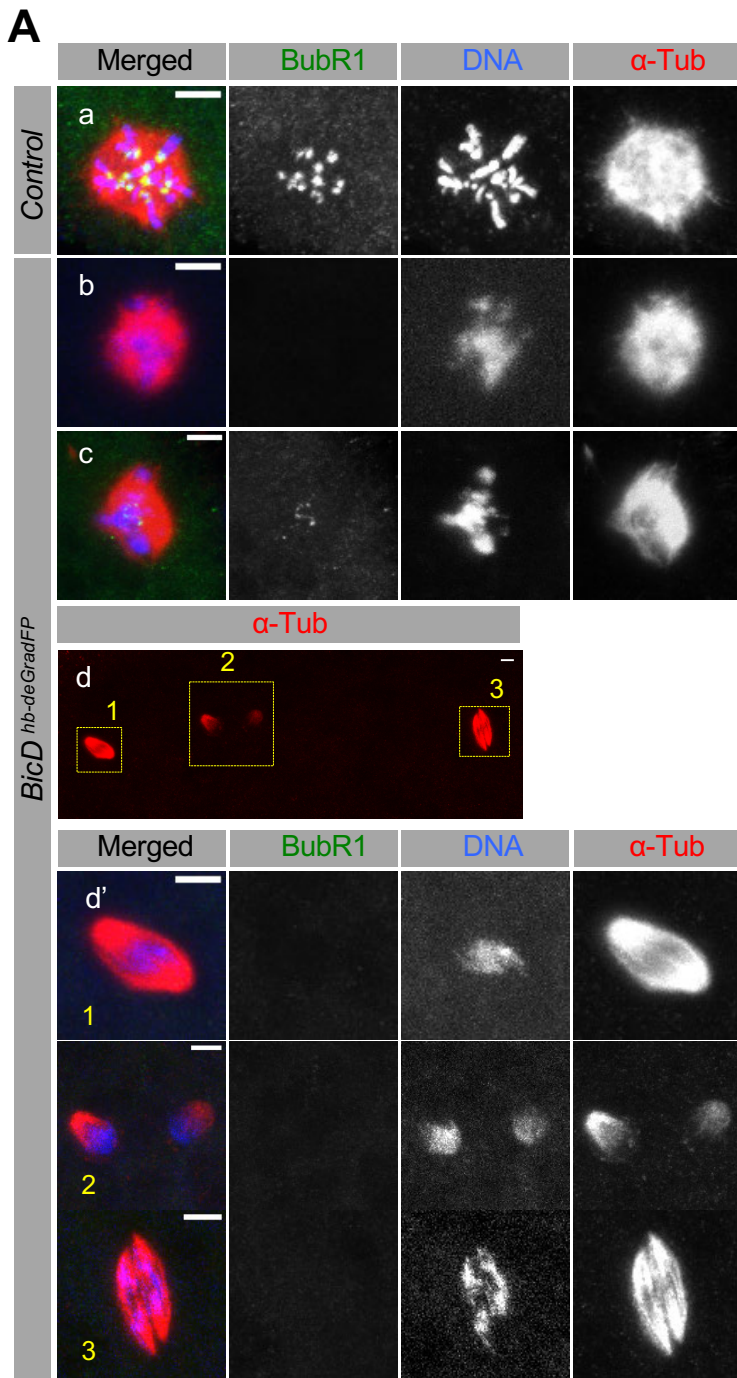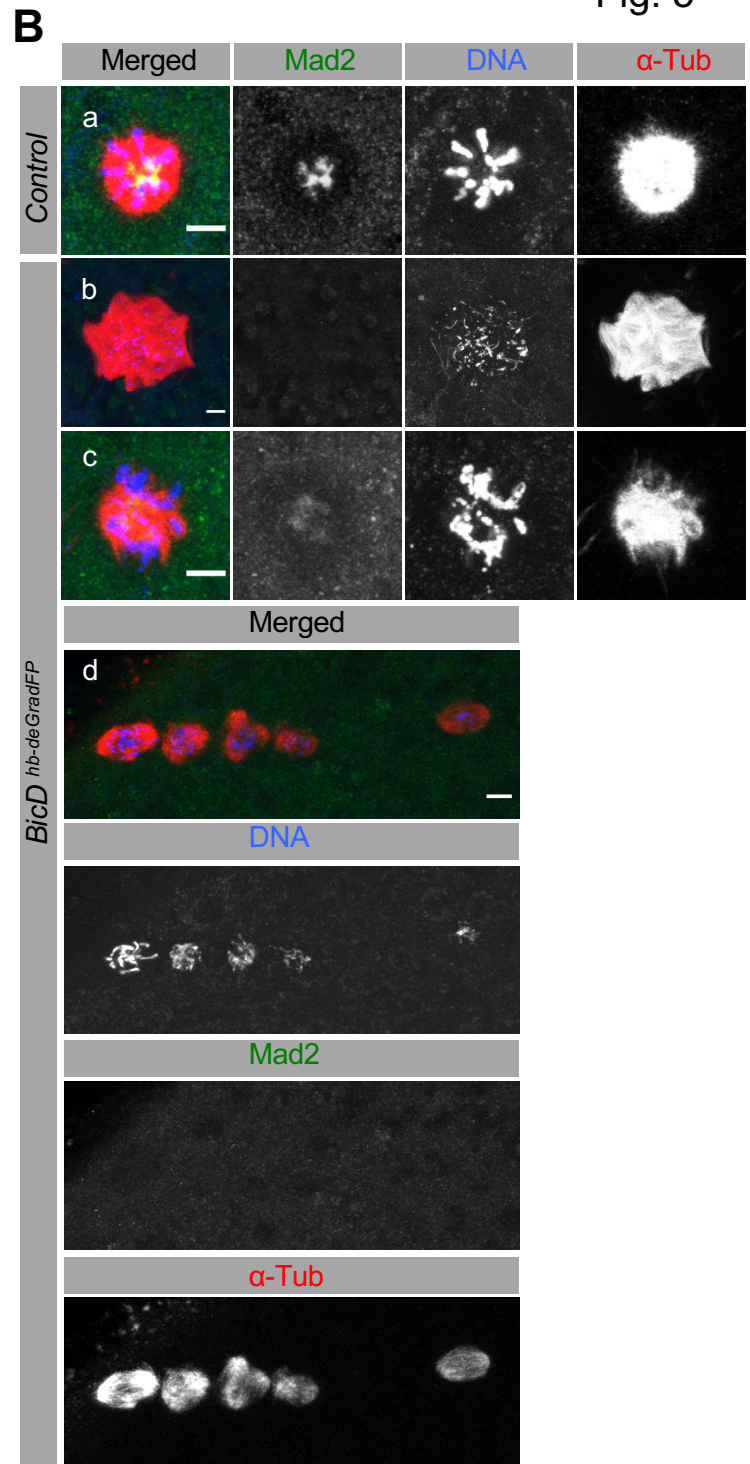

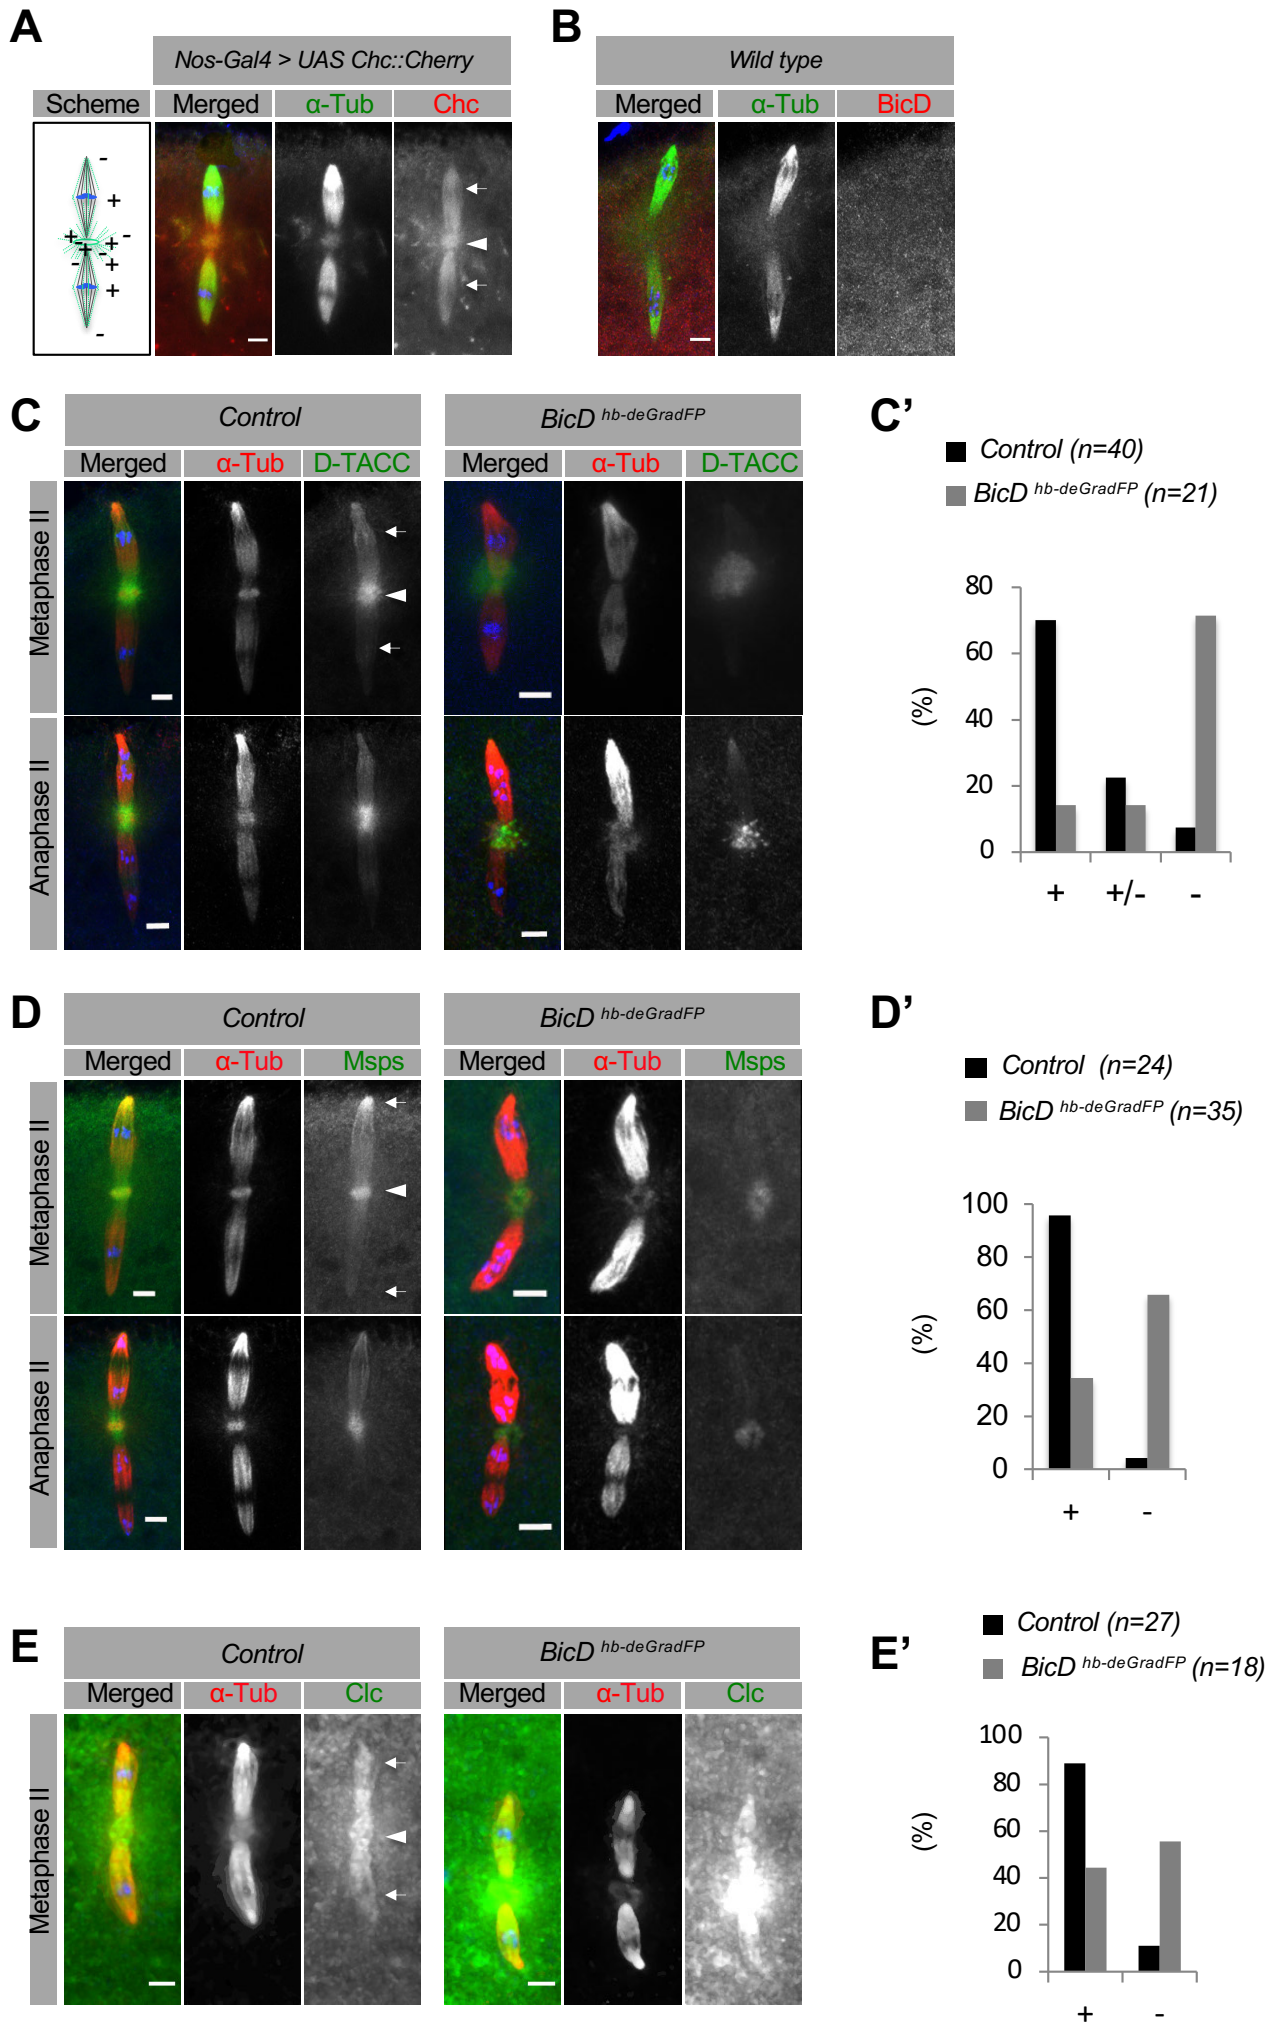

Fig. 7

**A**

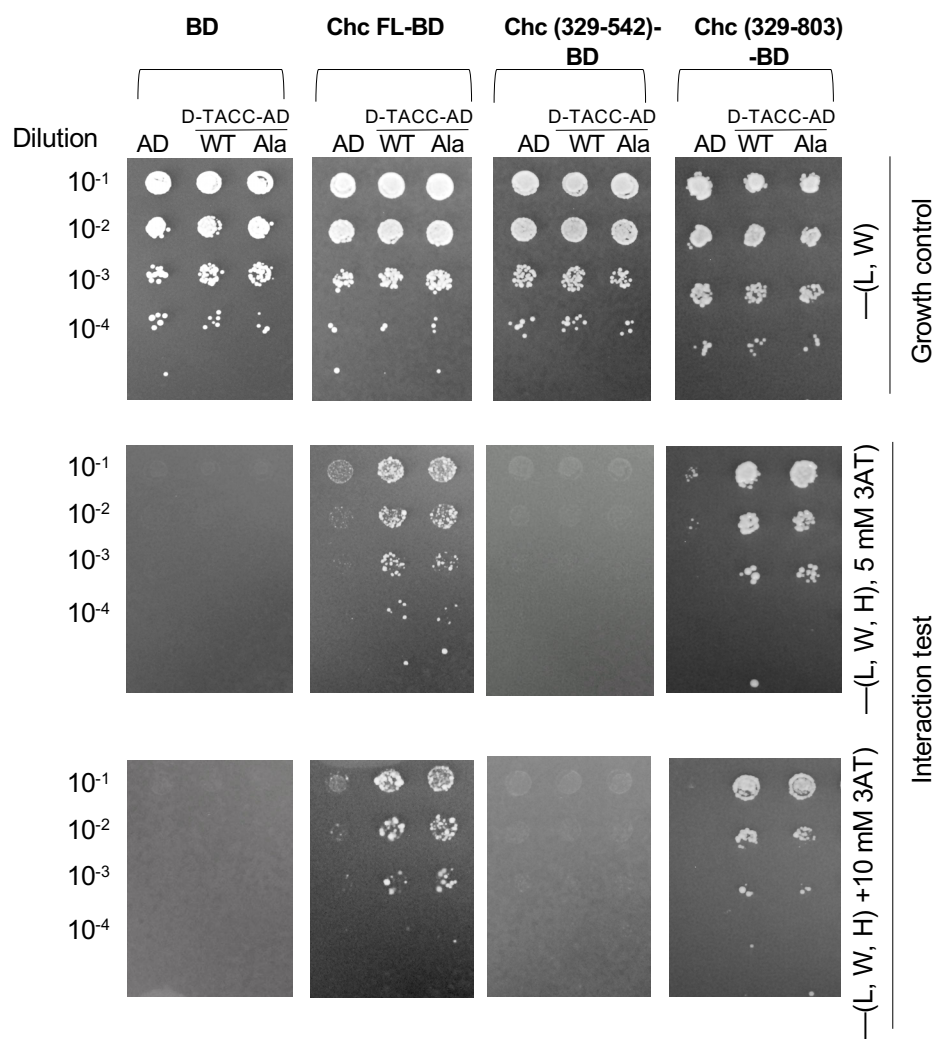

**B**

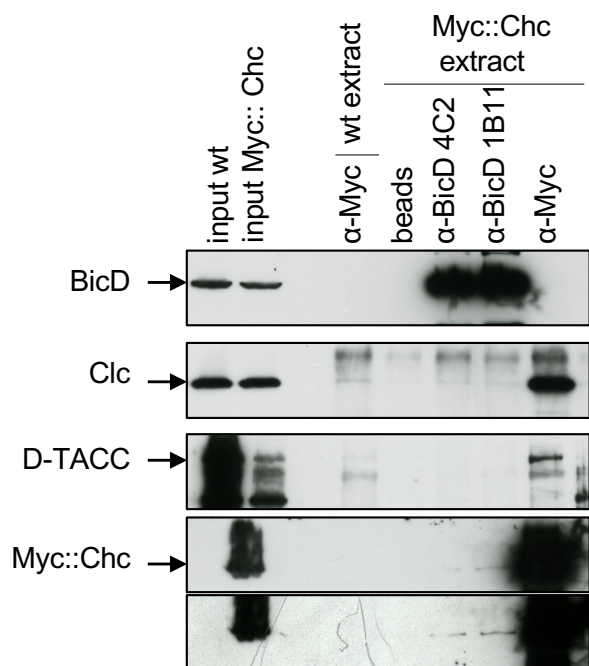



Fig. 8

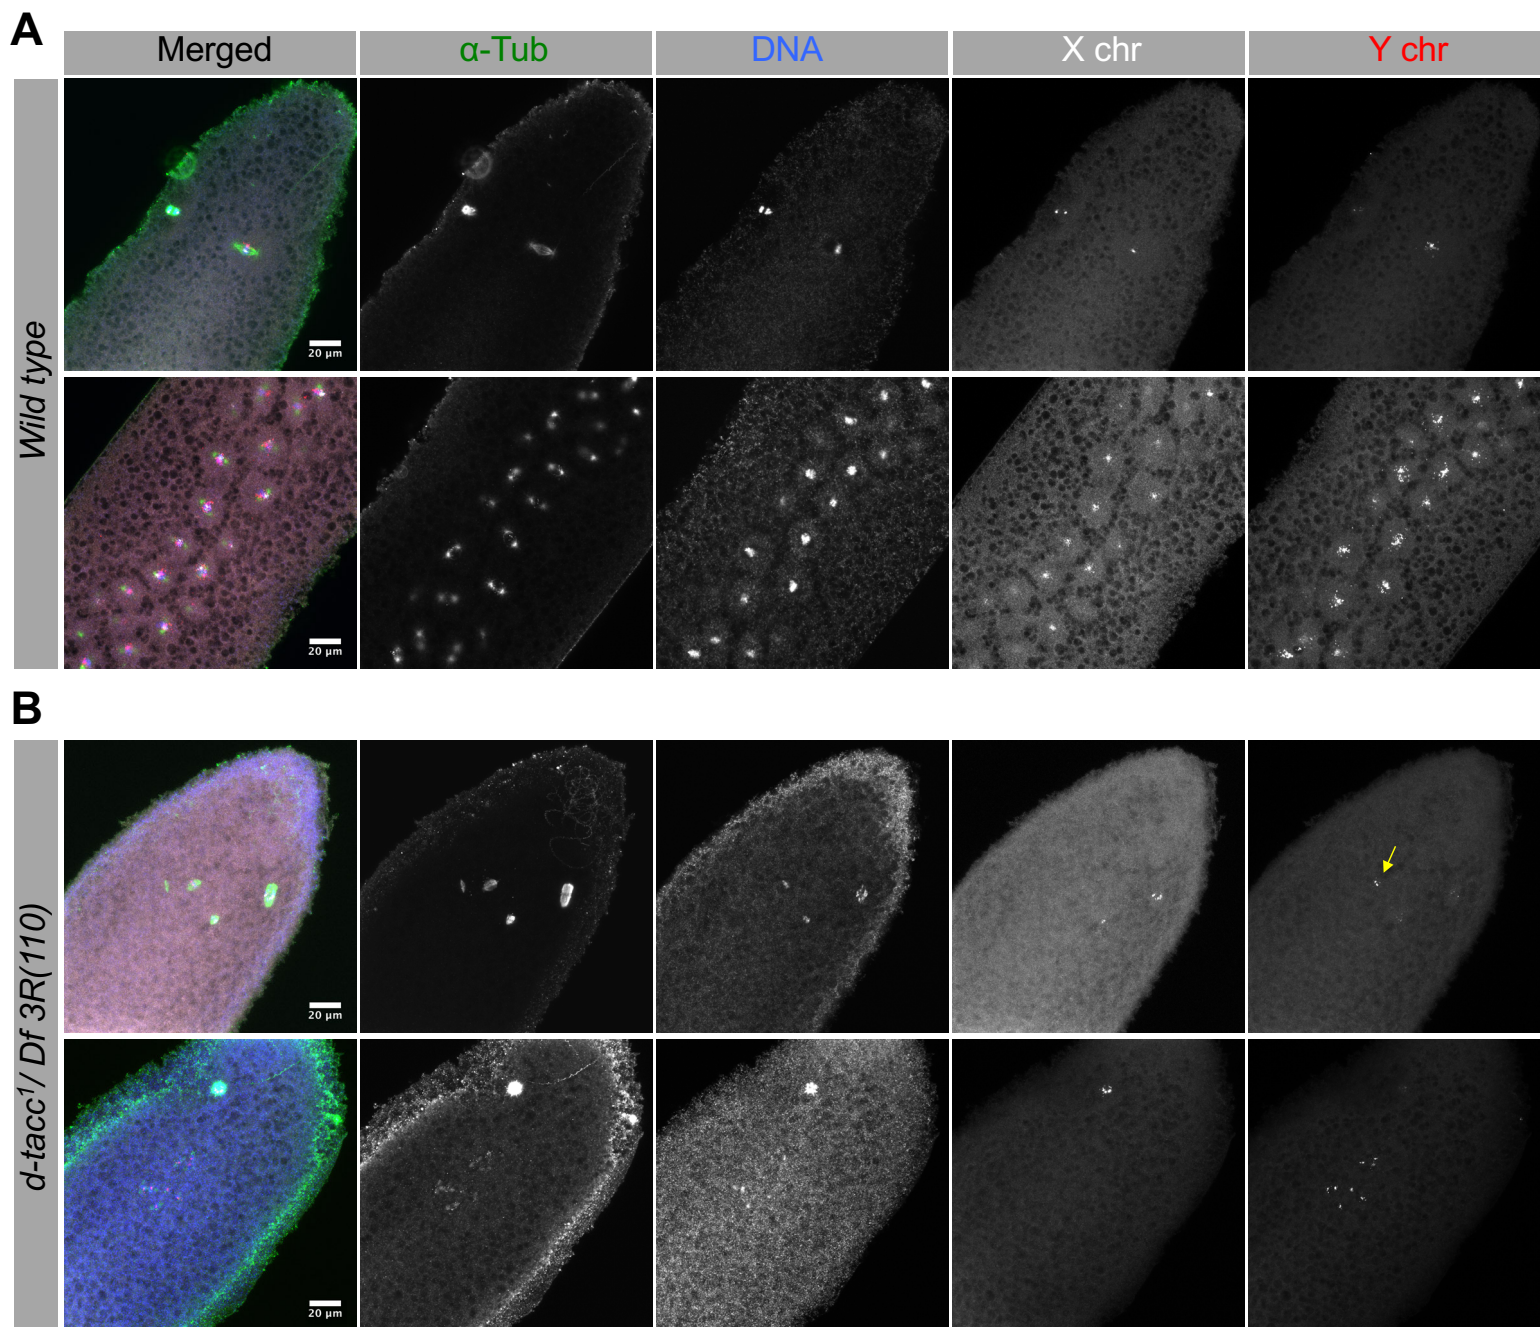

Fig. 9

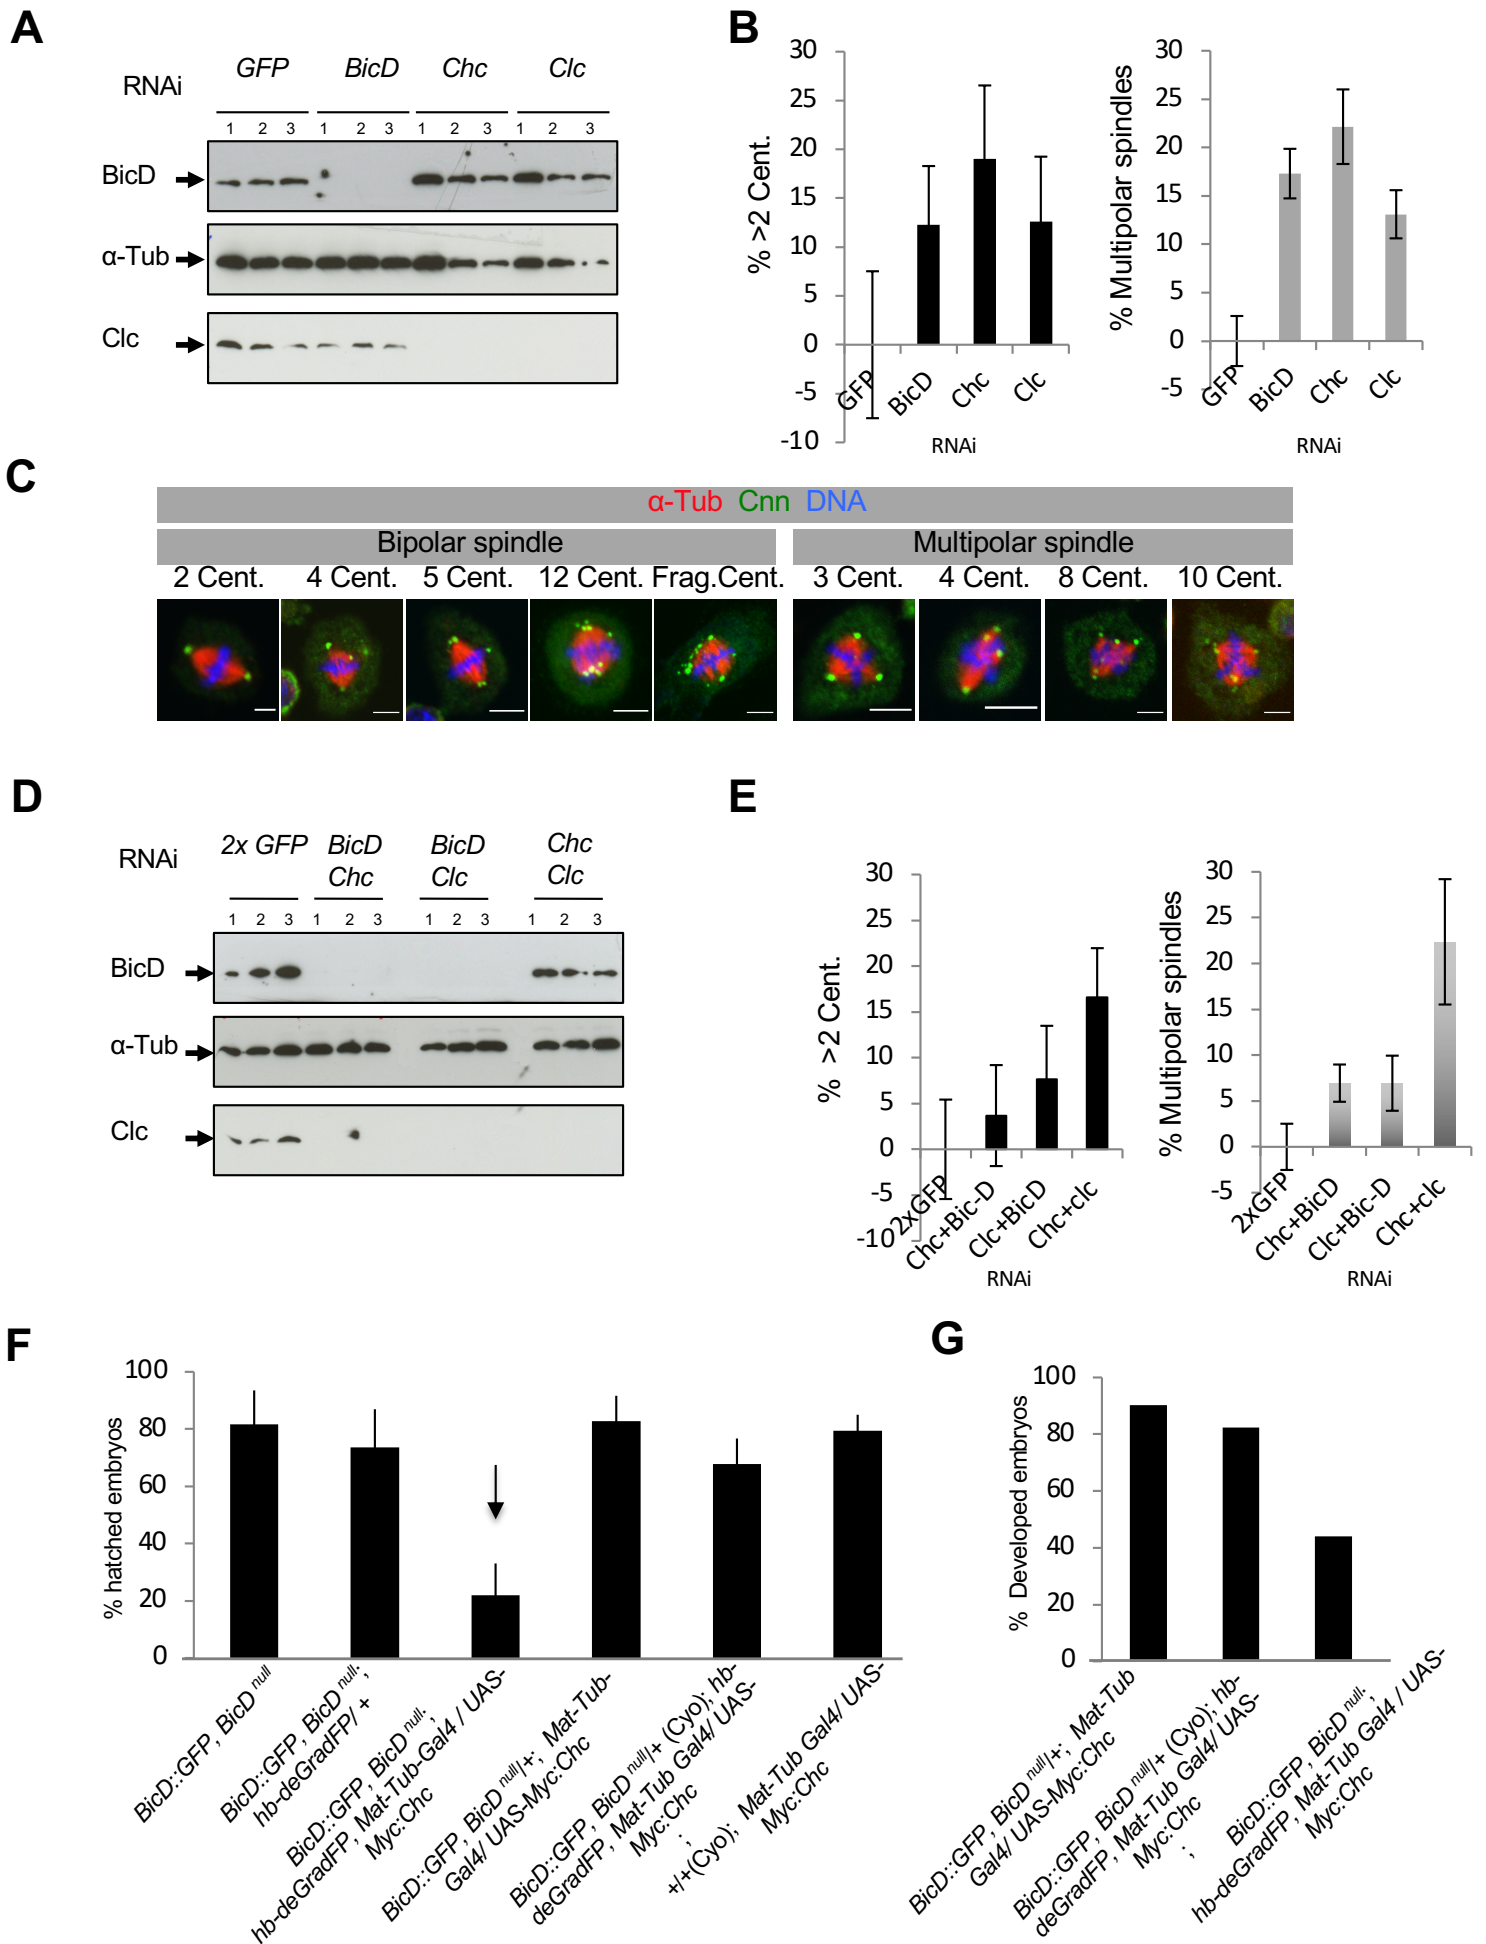



Fig. 10

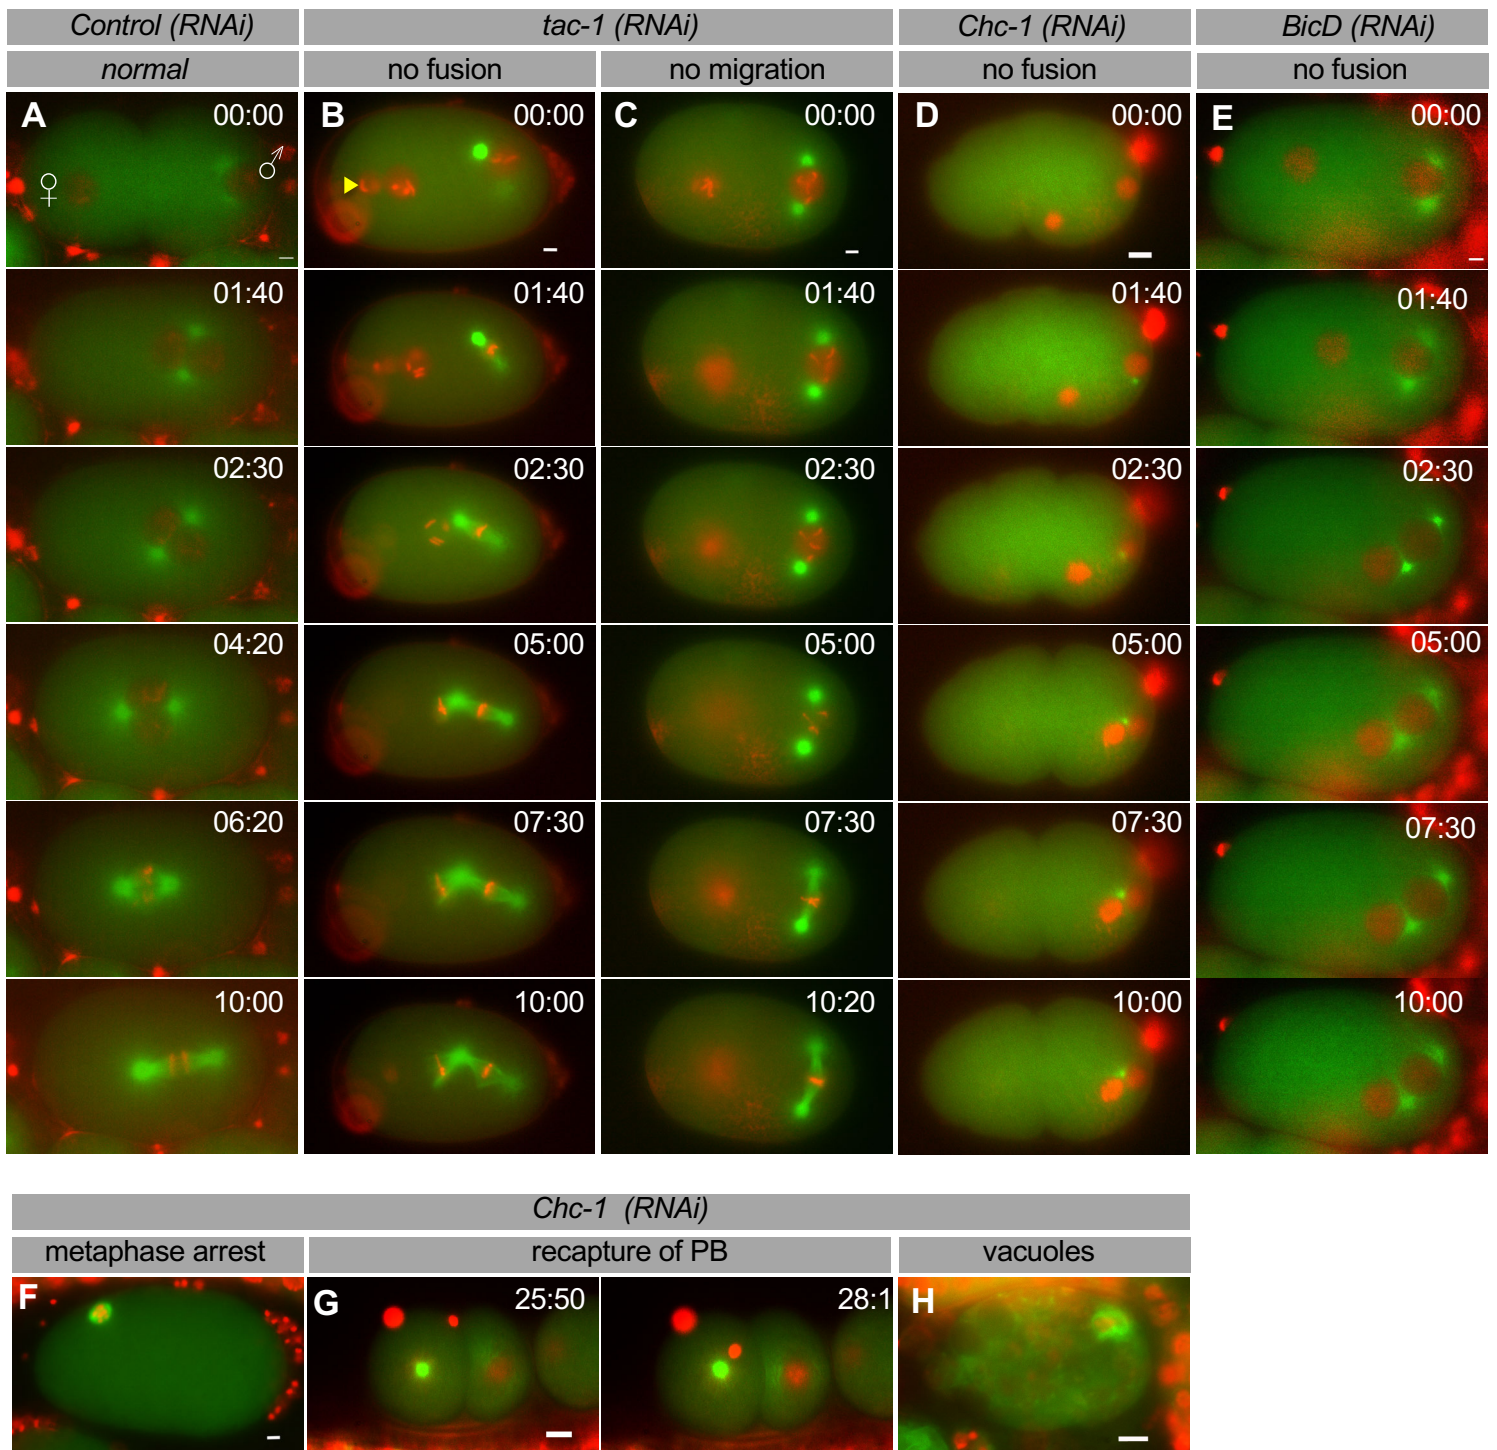



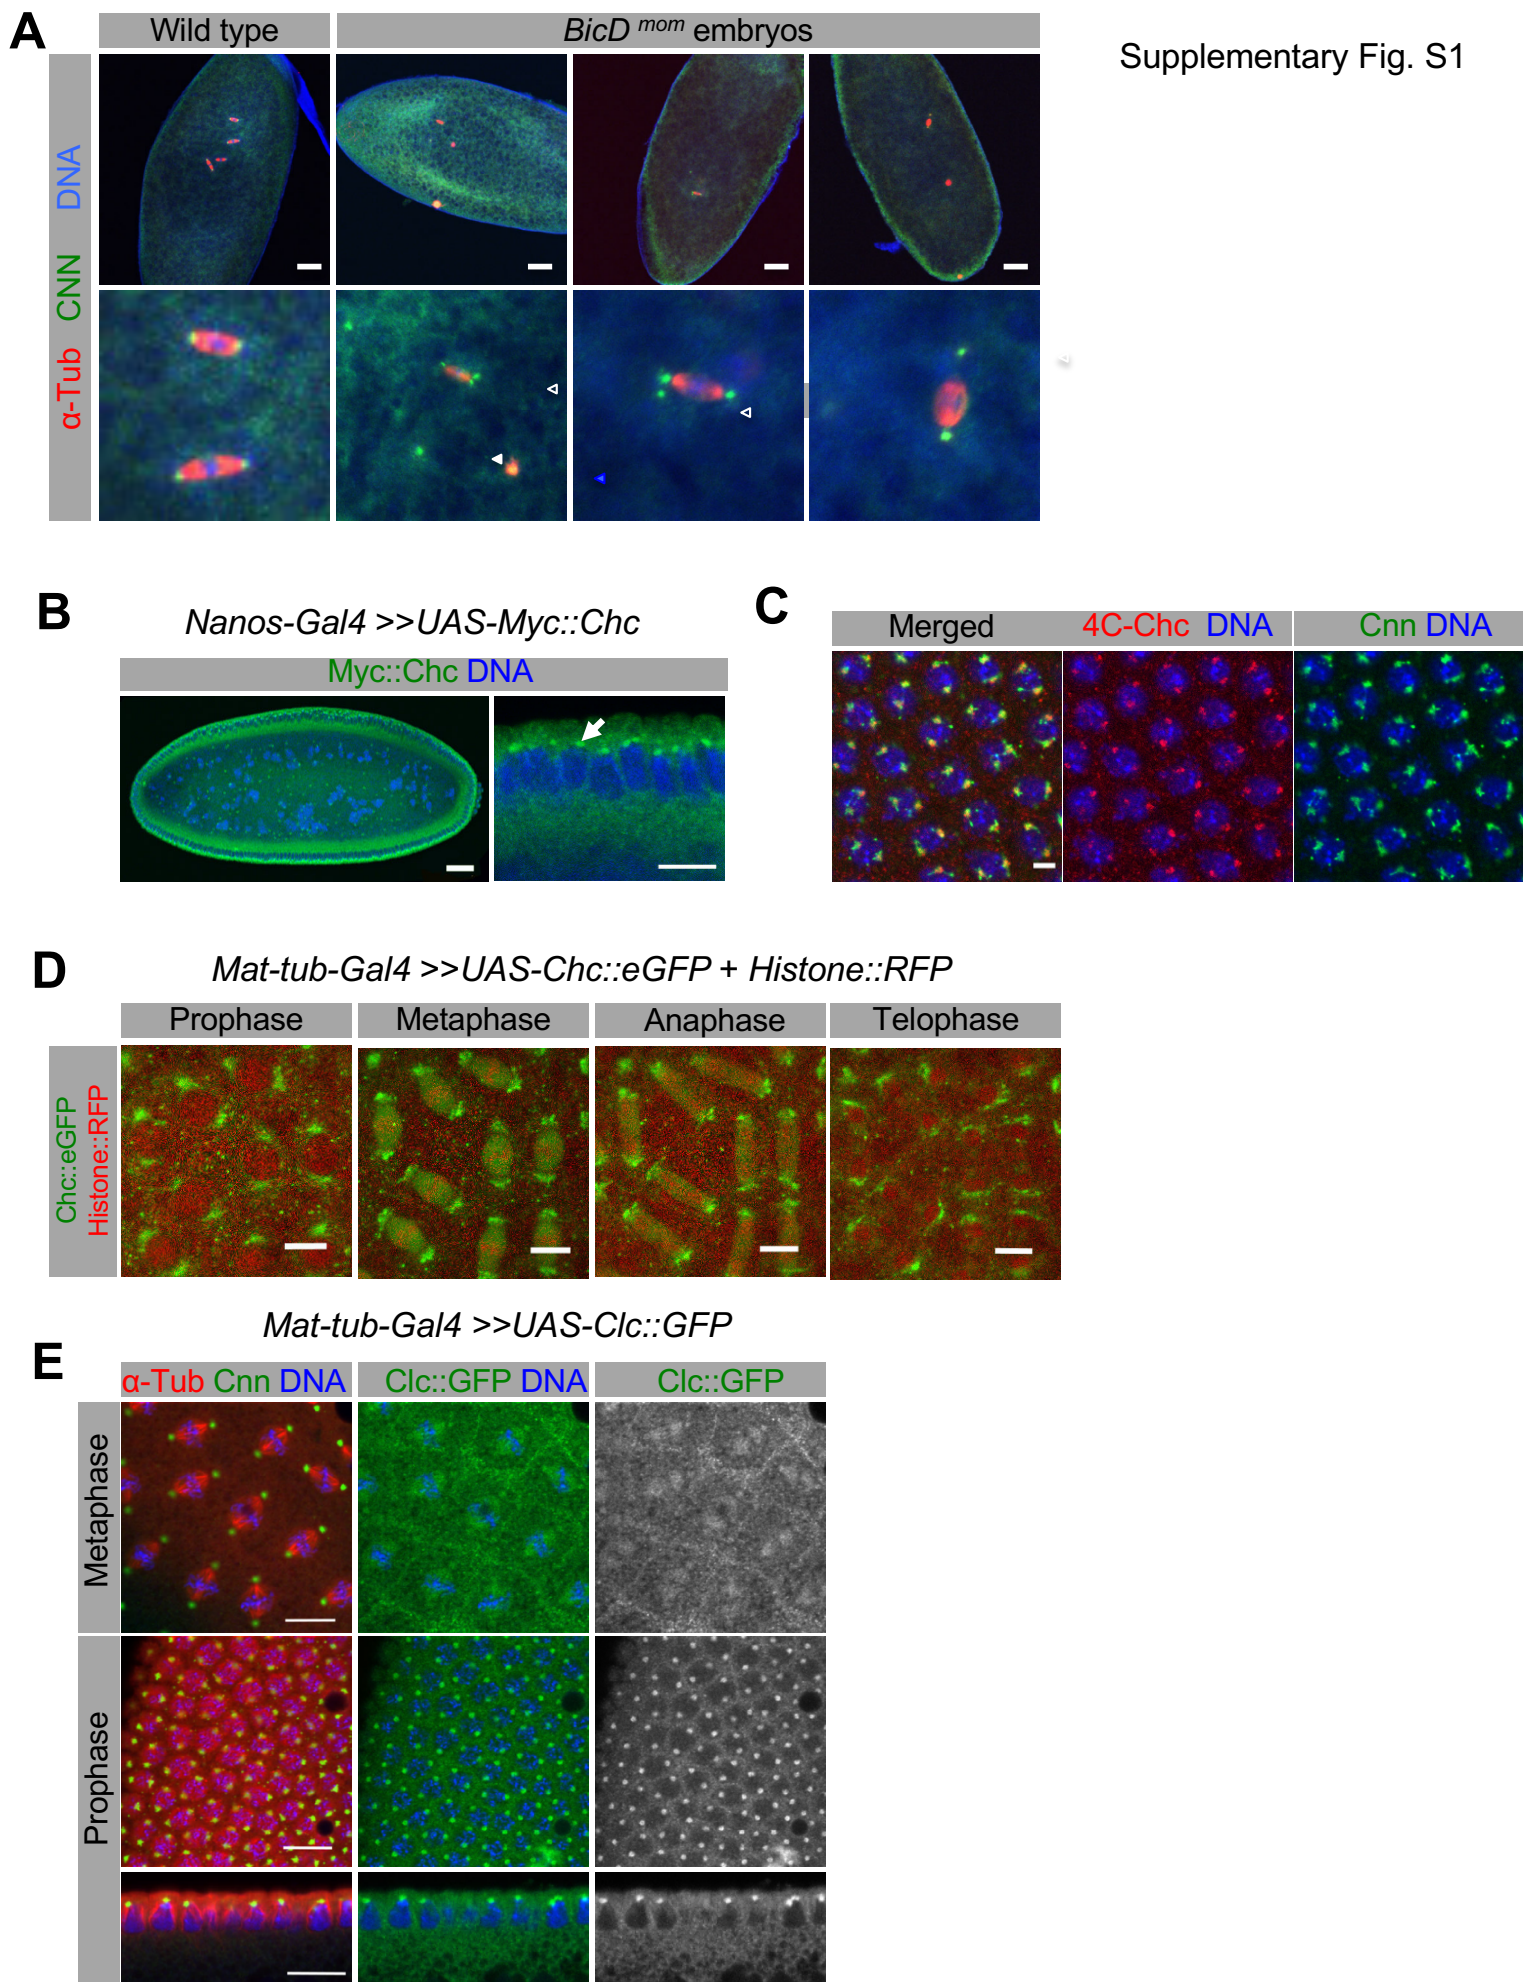

Supplementary Fig. S2

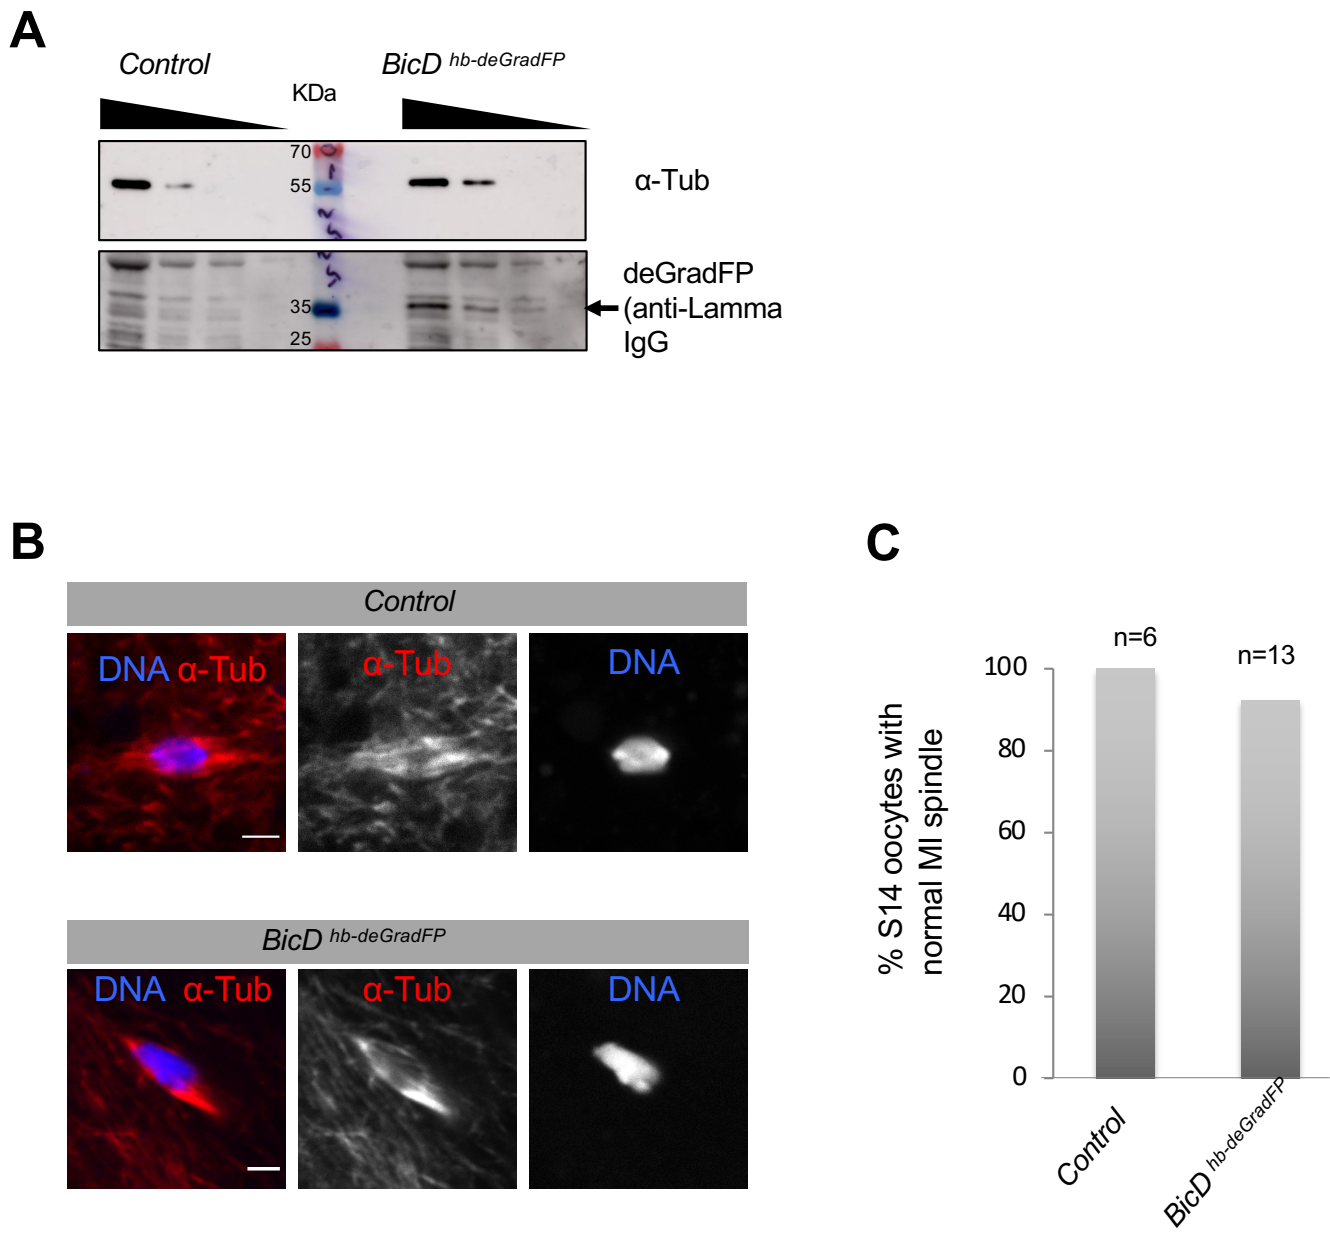

Supplementary Fig. S3

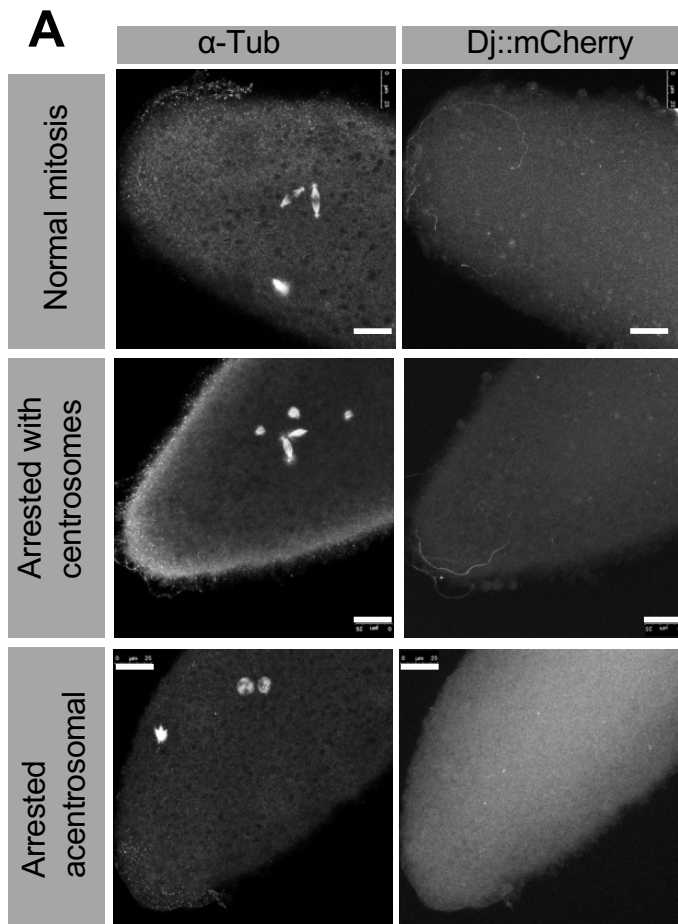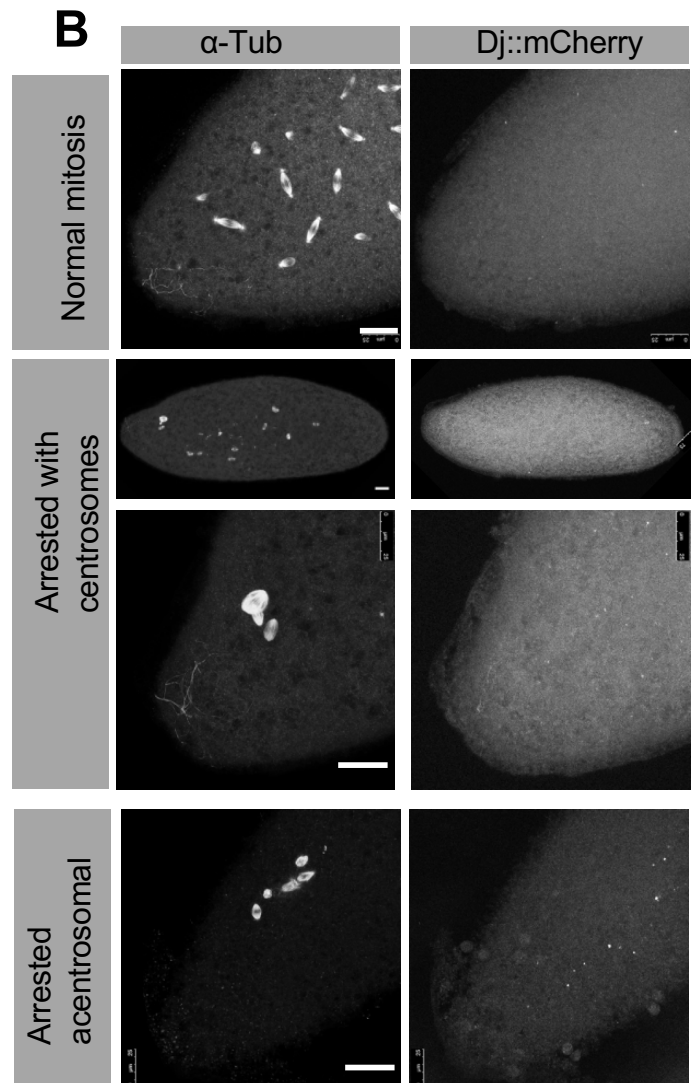



Supplementary Fig. S4

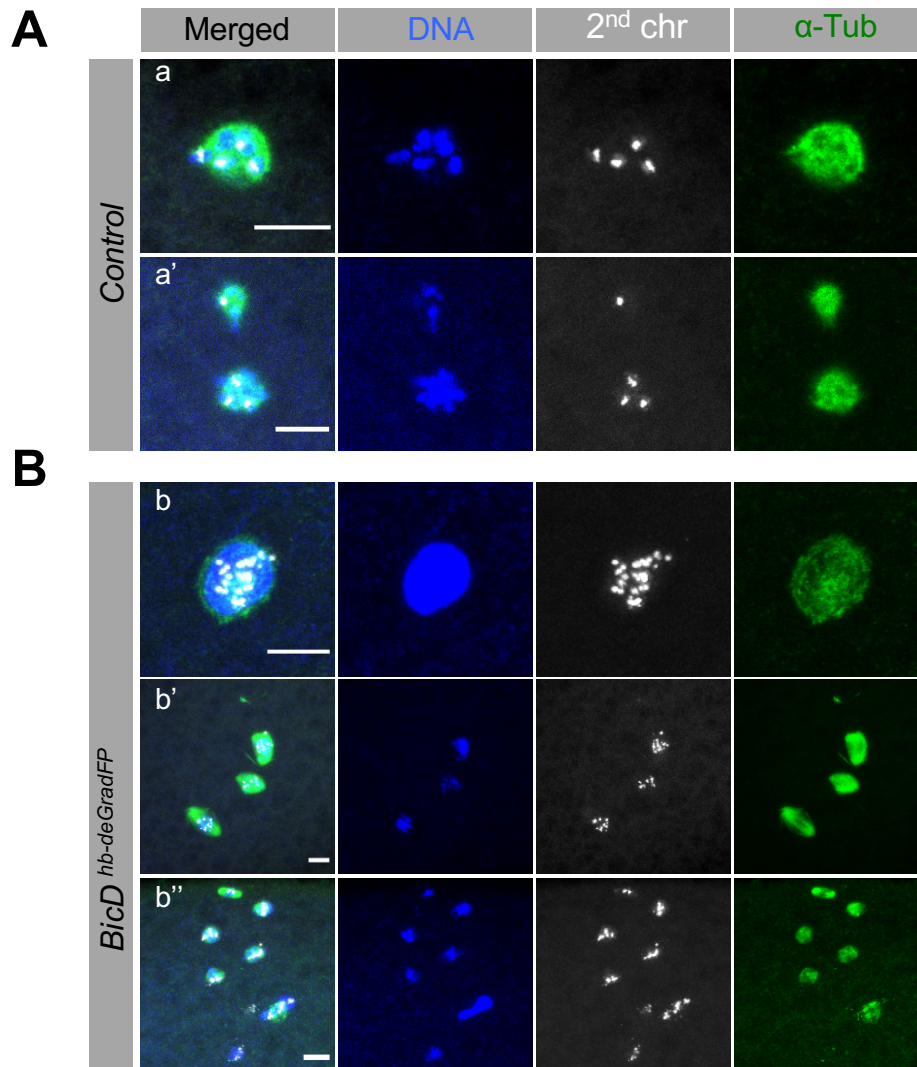

Supplementary Fig. S5

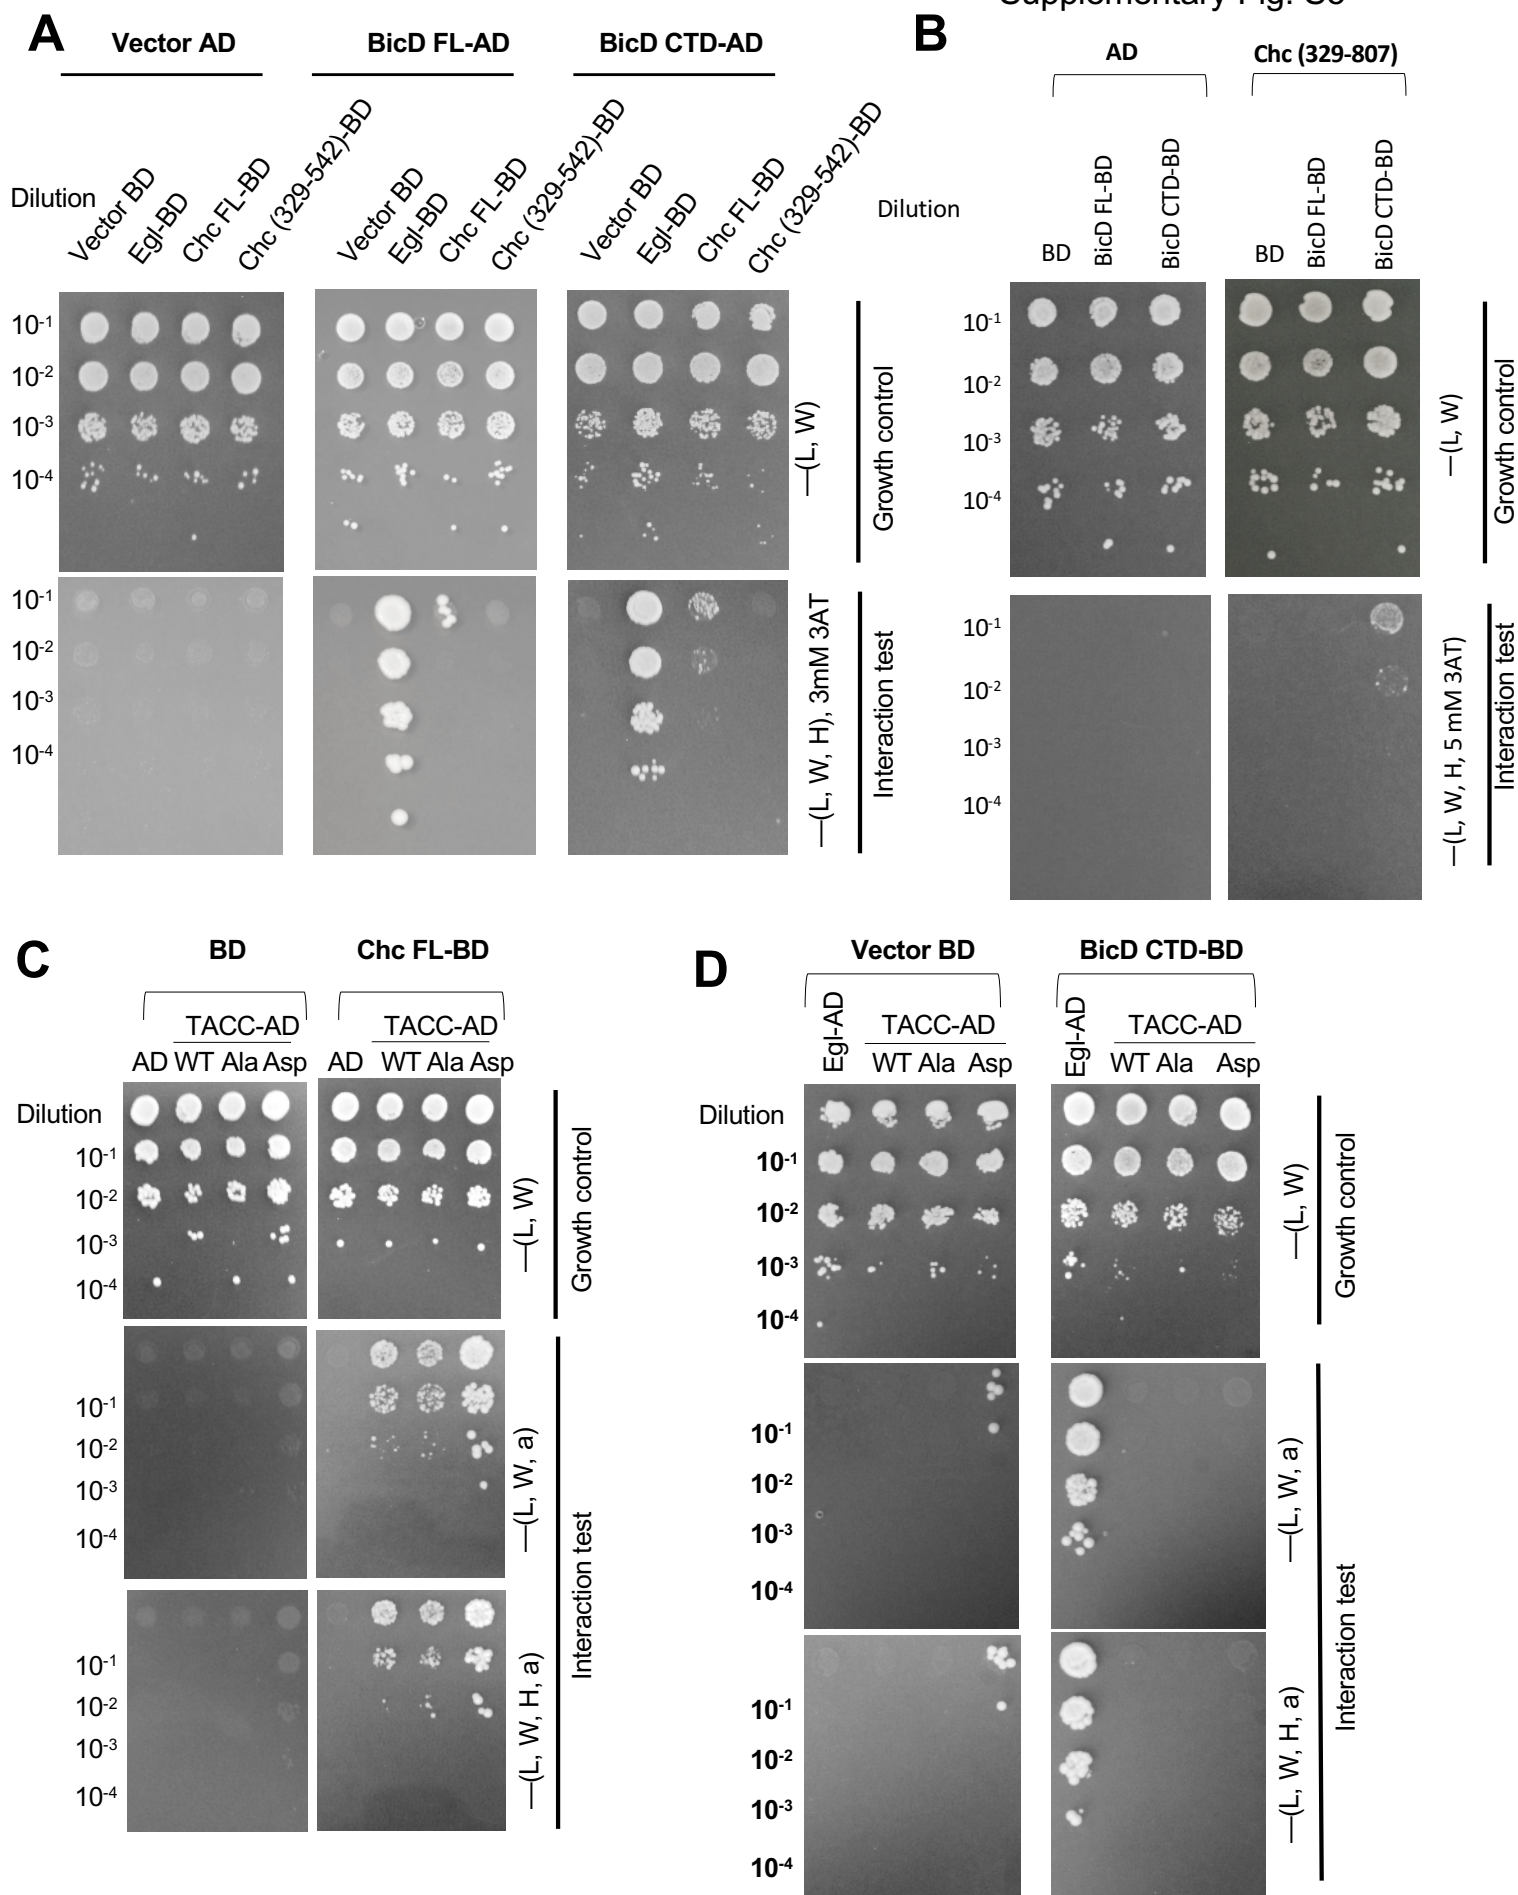

Supplementary Fig. S6

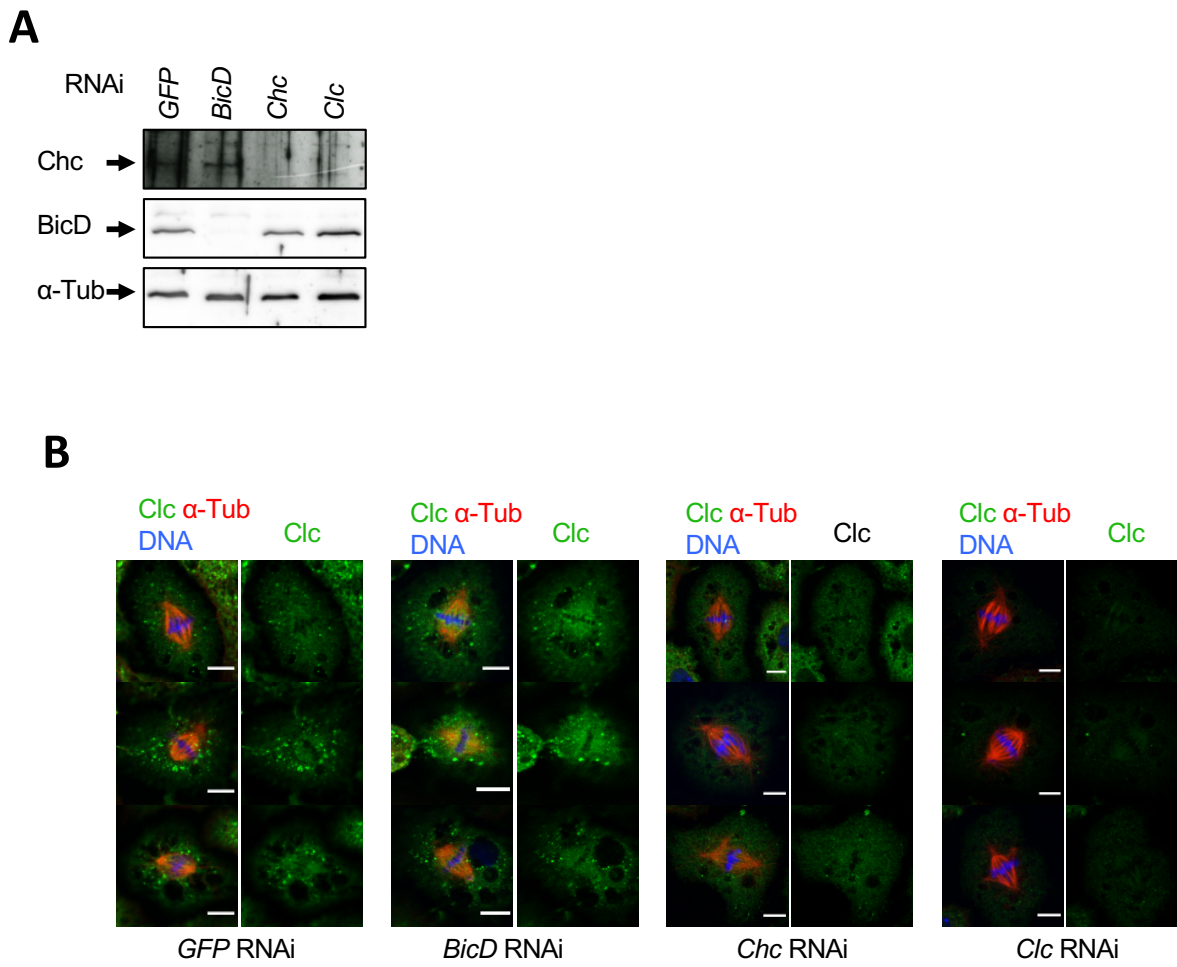



Supplementary Fig. S7

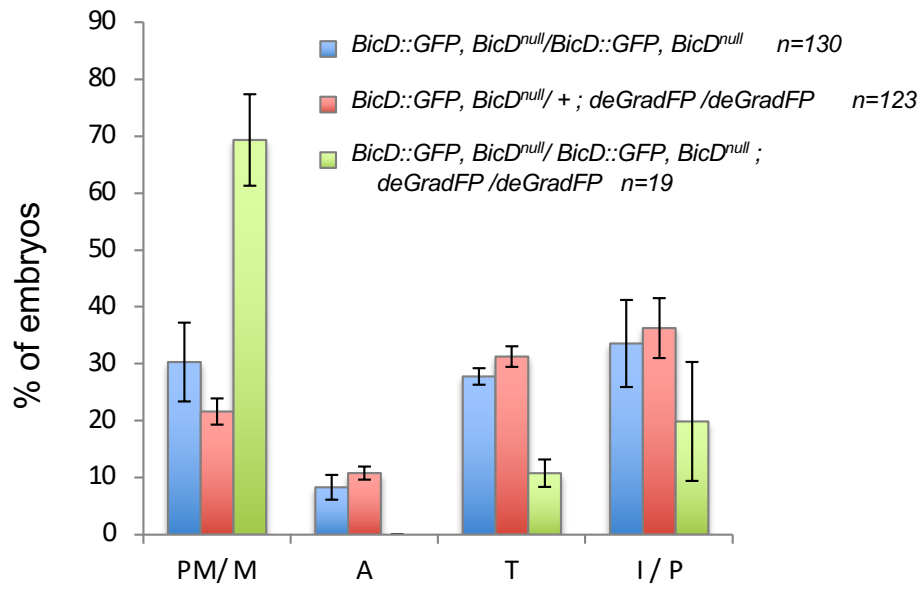

Source: https://www.biorxiv.org/content/10.1101/2020.12.22.423980v1.full.pdf
